# Supplementary material for: Mufangji Decoction Protects Against Post-Infarction Heart Failure by Reducing Oxidative Stress and Inflammatory Response
Source: Research Square preprint supplement (doi:10.21203/rs.3.rs-7956068/v1), 2025-11-13
Supplement: Supplementary file 1 [file 4bb26e61acee74d1141545fc.xlsx]

## Sheet: network pharmacology
compound	Target	中药
TNP00326	ABCB1	fj
Berbamine	ABCB1	fj
TNP00326	ABCG2	fj
Berbamine	ACE2	fj
menisperine	ACHE	fj
magnoflorine	ACHE	fj
Berbamine	ACHE	fj
Berbamine	ADCY10	fj
STOCK1N-53032	ADRB2	fj
N-Methylflindersine	ADRB2	fj
menisperine	ADRB2	fj
beta-sitosterol	ADRB2	fj
Berbamine	AKT1	fj
Berbamine	ANXA5	fj
aristolene	ANXA5	fj
TNP00326	AQP4	fj
menisperine	AR	fj
magnoflorine	AR	fj
TNP00326	AVP	fj
TNP00326	B2M	fj
beta-sitosterol	BAX	fj
Berbamine	BCHE	fj
beta-sitosterol	BCL2	fj
TNP00326	BCL2	fj
Berbamine	BCL2	fj
Berbamine	BCL2L1	fj
TNP00326	BDKRB2	fj
TNP00326	BIRC5	fj
Berbamine	BIRC5	fj
Berbamine	CA2	fj
menisperine	CALM2	fj
magnoflorine	CALM2	fj
Hesperetin	CALM2	fj
Berbamine	CAMK2G	fj
beta-sitosterol	CASP3	fj
Berbamine	CASP3	fj
beta-sitosterol	CASP8	fj
beta-sitosterol	CASP9	fj
TNP00326	CCK	fj
Berbamine	CCK	fj
tetrandrine	CCND1	fj
Berbamine	CCND1	fj
tetrandrine	CDK4	fj
tetrandrine	CDKN1A	fj
STOCK1N-53032	CHRM2	fj
patchouli alcohol	CHRM2	fj
N-Methylflindersine	CHRM2	fj
Hepanal	CHRM2	fj
beta-sitosterol	CHRM2	fj
beta-Gurjunene	CHRM2	fj
49070_FLUKA	CHRM2	fj
136458-42-9	CHRM2	fj
STOCK1N-53032	CHRM3	fj
patchouli alcohol	CHRM3	fj
N-Methylflindersine	CHRM3	fj
menisperine	CHRM3	fj
magnoflorine	CHRM3	fj
Hepanal	CHRM3	fj
beta-sitosterol	CHRM3	fj
beta-Gurjunene	CHRM3	fj
49070_FLUKA	CHRM3	fj
136458-42-9	CHRM3	fj
Berbamine	CHUK	fj
Berbamine	CPS1	fj
Berbamine	CSF3	fj
Berbamine	CTNNB1	fj
Berbamine	CYP27A1	fj
Berbamine	DCTN4	fj
TNP00326	EGFR	fj
TNP00326	F2	fj
Berbamine	F2	fj
TNP00326	F2R	fj
Berbamine	FBN2	fj
tetrandrine	FCER2	fj
tetrandrine	FOS	fj
Berbamine	G6PD	fj
TNP00326	GABPA	fj
Berbamine	GABPA	fj
Berbamine	GJB1	fj
TNP00326	GNAQ	fj
TNP00326	HMGA2	fj
TNP00326	HMOX1	fj
Berbamine	HMOX1	fj
STOCK1N-53032	HTR2A	fj
beta-sitosterol	HTR2A	fj
tetrandrine	IFNG	fj
tetrandrine	IL2	fj
tetrandrine	IL2RA	fj
tetrandrine	IL4	fj
TNP00326	IL6	fj
Berbamine	IL6	fj
aristolene	IL6	fj
TNP00326	INS	fj
Berbamine	INS	fj
Berbamine	JAK2	fj
beta-sitosterol	JUN	fj
Berbamine	JUN	fj
Berbamine	KCNH1	fj
menisperine	KCNH2	fj
magnoflorine	KCNH2	fj
beta-sitosterol	KCNH2	fj
TNP00326	KNG1	fj
Berbamine	LDLR	fj
TNP00326	MAPK8	fj
Berbamine	MAPK8	fj
Berbamine	MDM2	fj
TNP00326	MPO	fj
Berbamine	MTOR	fj
Berbamine	MYC	fj
TNP00326	MYCN	fj
Berbamine	NFKB1	fj
Berbamine	NFKBIA	fj
N-Methylflindersine	NOS2	fj
TNP00326	NOS3	fj
STOCK1N-53032	OPRM1	fj
menisperine	OPRM1	fj
beta-sitosterol	OPRM1	fj
Berbamine	PARP1	fj
N-Methylflindersine	PDE3A	fj
beta-sitosterol	PDE3A	fj
Berbamine	PIK3CA	fj
beta-sitosterol	PON1	fj
beta-sitosterol	PRKCA	fj
menisperine	PRSS1	fj
magnoflorine	PRSS1	fj
Tetraneurin A	PRTN3	fj
STOCK1N-53032	PTGS1	fj
N-Methylflindersine	PTGS1	fj
menisperine	PTGS1	fj
magnoflorine	PTGS1	fj
Hesperetin	PTGS1	fj
beta-sitosterol	PTGS1	fj
Betaine	PTGS1	fj
Aristololactum	PTGS1	fj
STOCK1N-53032	PTGS2	fj
N-Methylflindersine	PTGS2	fj
menisperine	PTGS2	fj
magnoflorine	PTGS2	fj
Hesperetin	PTGS2	fj
beta-sitosterol	PTGS2	fj
Betaine	PTGS2	fj
Aristololactum	PTGS2	fj
49070_FLUKA	PTGS2	fj
TNP00326	PTGS2	fj
Berbamine	PTGS2	fj
Berbamine	RARA	fj
tetrandrine	RELA	fj
Berbamine	RRAD	fj
STOCK1N-53032	RXRA	fj
N-Methylflindersine	RXRA	fj
menisperine	RXRA	fj
magnoflorine	RXRA	fj
STOCK1N-53032	SCN5A	fj
N-Methylflindersine	SCN5A	fj
menisperine	SCN5A	fj
magnoflorine	SCN5A	fj
Hesperetin	SCN5A	fj
beta-sitosterol	SCN5A	fj
Aristololactum	SCN5A	fj
STOCK1N-53032	SLC6A2	fj
N-Methylflindersine	SLC6A2	fj
STOCK1N-53032	SLC6A3	fj
N-Methylflindersine	SLC6A3	fj
STOCK1N-53032	SLC6A4	fj
N-Methylflindersine	SLC6A4	fj
beta-sitosterol	SLC6A4	fj
tetrandrine	SMAD3	fj
tetrandrine	SMAD7	fj
Berbamine	SOST	fj
TNP00326	SP1	fj
Berbamine	STAT3	fj
Berbamine	STAT4	fj
tetrandrine	TGFB1	fj
beta-sitosterol	TGFB1	fj
Berbamine	TNF	fj
aristolene	TNF	fj
Berbamine	TNFAIP3	fj
tetrandrine	TP53	fj
Berbamine	TP53	fj
Berbamine	VEGFA	fj
Berbamine	XDH	fj
ST069309	ACHE	gz
(-)-Epoxycaryophyllene	ACHE	gz
(-)-Caryophyllene oxide	ACHE	gz
1, 10, 14-trimethyl-2-pentadecanone	ACHE	gz
Peroxyergosterol	ACHE	gz
WLN: RVO2R	ADRA2B	gz
WLN: RVO2R	ADRA2C	gz
1,2-Dibenzoylethane	ADRA2C	gz
WLN: RVO2R	ADRB1	gz
1,2-Dibenzoylethane	ADRB1	gz
1,2-Benzenedicarboxylicacid, mono(2-ethyl) hexylester	ADRB1	gz
(&#8722;)-Alloaromadendrene	ADRB1	gz
WLN: RVO2R	ADRB2	gz
ST069309	ADRB2	gz
Sitogluside	ADRB2	gz
DMEP	ADRB2	gz
DIBP	ADRB2	gz
DBP	ADRB2	gz
beta-sitosterol	ADRB2	gz
1,2-Dibenzoylethane	ADRB2	gz
1,2-Benzenedicarboxylicacid, mono(2-ethyl) hexylester	ADRB2	gz
(&#8722;)-Alloaromadendrene	ADRB2	gz
taxifolin	AKR1B1	gz
Peroxyergosterol	AKR1B1	gz
Peroxyergosterol	AKT1	gz
Peroxyergosterol	AKT2	gz
1, 10, 14-trimethyl-2-pentadecanone	ALB	gz
ST069309	AR	gz
beta-sitosterol	BAX	gz
beta-sitosterol	BCL2	gz
Peroxyergosterol	BCL2	gz
Peroxyergosterol	BCL2L1	gz
1, 10, 14-trimethyl-2-pentadecanone	CA2	gz
Sitogluside	CALM2	gz
(+)-catechin	CALM2	gz
Peroxyergosterol	CAPN3	gz
beta-sitosterol	CASP3	gz
1, 10, 14-trimethyl-2-pentadecanone	CASP3	gz
Peroxyergosterol	CASP3	gz
beta-sitosterol	CASP8	gz
Peroxyergosterol	CASP8	gz
beta-sitosterol	CASP9	gz
Peroxyergosterol	CASP9	gz
1, 10, 14-trimethyl-2-pentadecanone	CAT	gz
1, 10, 14-trimethyl-2-pentadecanone	CCND1	gz
Peroxyergosterol	CCND1	gz
Peroxyergosterol	CDKN1A	gz
Peroxyergosterol	CDKN3	gz
ST069309	CHRM2	gz
Hepanal	CHRM2	gz
EIC	CHRM2	gz
DIBP	CHRM2	gz
DBP	CHRM2	gz
copaene	CHRM2	gz
copaene	CHRM2	gz
beta-sitosterol	CHRM2	gz
beta-Cubebene	CHRM2	gz
58870_FLUKA	CHRM2	gz
1H-Cycloprop(e)azulen-7-ol, decahydro-1,1,7-trimethyl-4-methylene-, (1aR-(1aalpha,4aalpha,7beta,7abeta,7balpha))-	CHRM2	gz
(-)-Epoxycaryophyllene	CHRM2	gz
(-)-Caryophyllene oxide	CHRM2	gz
()-Aromadendrene	CHRM2	gz
()-alpha-Longipinene	CHRM2	gz
()-alpha-Funebrene	CHRM2	gz
(&#8722;)-Alloaromadendrene	CHRM2	gz
α-Longipinene	CHRM3	gz
WLN: RVO2R	CHRM3	gz
ST069309	CHRM3	gz
Sitogluside	CHRM3	gz
phytol	CHRM3	gz
Hepanal	CHRM3	gz
DIBP	CHRM3	gz
copaene	CHRM3	gz
copaene	CHRM3	gz
beta-sitosterol	CHRM3	gz
58870_FLUKA	CHRM3	gz
1H-Cycloprop(e)azulen-7-ol, decahydro-1,1,7-trimethyl-4-methylene-, (1aR-(1aalpha,4aalpha,7beta,7abeta,7balpha))-	CHRM3	gz
1,2-Dibenzoylethane	CHRM3	gz
1,2-Benzenedicarboxylicacid, mono(2-ethyl) hexylester	CHRM3	gz
(-)-Epoxycaryophyllene	CHRM3	gz
(-)-Caryophyllene oxide	CHRM3	gz
()-Aromadendrene	CHRM3	gz
()-alpha-Longipinene	CHRM3	gz
()-alpha-Funebrene	CHRM3	gz
(-)-alpha-cedrene	CHRM3	gz
(&#8722;)-Alloaromadendrene	CHRM3	gz
Peroxyergosterol	CHUK	gz
oleic acid	CRP	gz
Peroxyergosterol	CTNNB1	gz
Peroxyergosterol	CXCL8	gz
Peroxyergosterol	EIF2AK2	gz
oleic acid	ERBB2	gz
ST069309	ESR1	gz
ent-Epicatechin	ESR1	gz
1,2-Dibenzoylethane	ESR1	gz
(+)-catechin	ESR1	gz
ST069309	ESR2	gz
Peroxyergosterol	FOXO3	gz
1, 10, 14-trimethyl-2-pentadecanone	GAA	gz
Peroxyergosterol	GAA	gz
DBP	GSK3B	gz
Peroxyergosterol	HSPB1	gz
DIBP	HTR2A	gz
DBP	HTR2A	gz
beta-sitosterol	HTR2A	gz
(&#8722;)-Alloaromadendrene	HTR2A	gz
taxifolin	ICAM1	gz
Peroxyergosterol	IKBKB	gz
Peroxyergosterol	IL2	gz
Peroxyergosterol	IL6	gz
1, 10, 14-trimethyl-2-pentadecanone	INS	gz
beta-sitosterol	JUN	gz
Sitogluside	KCNH2	gz
beta-sitosterol	KCNH2	gz
1, 10, 14-trimethyl-2-pentadecanone	KNG1	gz
Peroxyergosterol	LDLR	gz
oleic acid	LYZ	gz
EIC	LYZ	gz
()-Aromadendrene	LYZ	gz
1,2-Dibenzoylethane	MAOB	gz
Peroxyergosterol	MAPK14	gz
Peroxyergosterol	MAPK8	gz
oleic acid	MPO	gz
1, 10, 14-trimethyl-2-pentadecanone	MT-CO1	gz
1, 10, 14-trimethyl-2-pentadecanone	MT-CO2	gz
Peroxyergosterol	MX1	gz
Peroxyergosterol	MYC	gz
Peroxyergosterol	MYD88	gz
Peroxyergosterol	NFKB1	gz
ST069309	NOS2	gz
Peroxyergosterol	NOS2	gz
Peroxyergosterol	NR1H4	gz
Peroxyergosterol	NR1H4	gz
sitosterol	NR3C2	gz
DIBP	NR3C2	gz
ST069309	OPRM1	gz
beta-sitosterol	OPRM1	gz
Peroxyergosterol	PARP1	gz
Sitogluside	PDE3A	gz
DBP	PDE3A	gz
beta-sitosterol	PDE3A	gz
1,2-Dibenzoylethane	PDE3A	gz
1,2-Benzenedicarboxylicacid, mono(2-ethyl) hexylester	PDE3A	gz
Peroxyergosterol	PIK3CA	gz
oleic acid	PLAU	gz
oleic acid	PON1	gz
beta-sitosterol	PON1	gz
phytol	PPARA	gz
oleic acid	PPARA	gz
oleic acid	PPARD	gz
oleic acid	PPARG	gz
beta-sitosterol	PRKCA	gz
taxifolin	PTGS1	gz
Sitogluside	PTGS1	gz
oleic acid	PTGS1	gz
ent-Epicatechin	PTGS1	gz
ELD	PTGS1	gz
EIC	PTGS1	gz
DBP	PTGS1	gz
copaene	PTGS1	gz
beta-sitosterol	PTGS1	gz
1,2-Dibenzoylethane	PTGS1	gz
(+)-catechin	PTGS1	gz
(-)-taxifolin	PTGS1	gz
α-Longipinene	PTGS2	gz
taxifolin	PTGS2	gz
ST069309	PTGS2	gz
Sitogluside	PTGS2	gz
phytol	PTGS2	gz
oleic acid	PTGS2	gz
ent-Epicatechin	PTGS2	gz
ELD	PTGS2	gz
EIC	PTGS2	gz
DBP	PTGS2	gz
copaene	PTGS2	gz
copaene	PTGS2	gz
beta-sitosterol	PTGS2	gz
beta-Cubebene	PTGS2	gz
1,2-Dibenzoylethane	PTGS2	gz
1,2-Benzenedicarboxylicacid, mono(2-ethyl) hexylester	PTGS2	gz
(+)-catechin	PTGS2	gz
(-)-taxifolin	PTGS2	gz
(-)-Epoxycaryophyllene	PTGS2	gz
(-)-Caryophyllene oxide	PTGS2	gz
()-alpha-Funebrene	PTGS2	gz
(-)-alpha-cedrene	PTGS2	gz
Peroxyergosterol	PTGS2	gz
Peroxyergosterol	PTPN11	gz
Peroxyergosterol	RAC2	gz
taxifolin	RELA	gz
taxifolin	RXRA	gz
ST069309	RXRA	gz
Sitogluside	RXRA	gz
phytol	RXRA	gz
oleic acid	RXRA	gz
EIC	RXRA	gz
DIBP	RXRA	gz
DBP	RXRA	gz
copaene	RXRA	gz
1,2-Benzenedicarboxylicacid, mono(2-ethyl) hexylester	RXRA	gz
(+)-catechin	RXRA	gz
()-alpha-Funebrene	RXRA	gz
(-)-alpha-cedrene	RXRA	gz
(&#8722;)-Alloaromadendrene	RXRA	gz
Sitogluside	SCN5A	gz
DMEP	SCN5A	gz
beta-sitosterol	SCN5A	gz
1,2-Benzenedicarboxylicacid, mono(2-ethyl) hexylester	SCN5A	gz
oleic acid	SERPINE1	gz
Peroxyergosterol	SGCB	gz
EIC	SLC6A2	gz
DIBP	SLC6A2	gz
DBP	SLC6A2	gz
beta-Cubebene	SLC6A2	gz
1,2-Benzenedicarboxylicacid, mono(2-ethyl) hexylester	SLC6A2	gz
(&#8722;)-Alloaromadendrene	SLC6A2	gz
WLN: RVO2R	SLC6A3	gz
DBP	SLC6A3	gz
1,2-Dibenzoylethane	SLC6A3	gz
1,2-Benzenedicarboxylicacid, mono(2-ethyl) hexylester	SLC6A3	gz
(&#8722;)-Alloaromadendrene	SLC6A3	gz
WLN: RVO2R	SLC6A4	gz
DIBP	SLC6A4	gz
beta-sitosterol	SLC6A4	gz
1,2-Dibenzoylethane	SLC6A4	gz
1,2-Benzenedicarboxylicacid, mono(2-ethyl) hexylester	SLC6A4	gz
Peroxyergosterol	SMAD2	gz
Peroxyergosterol	SMAD3	gz
Peroxyergosterol	SMO	gz
oleic acid	SOD1	gz
Peroxyergosterol	SREBF1	gz
Peroxyergosterol	STAT1	gz
Peroxyergosterol	STAT3	gz
beta-sitosterol	TGFB1	gz
Peroxyergosterol	TLR4	gz
Peroxyergosterol	TNF	gz
Peroxyergosterol	TSPO	gz
Peroxyergosterol	VCP	gz
Peroxyergosterol	VEGFA	gz
Peroxyergosterol	VEGFC	gz
Gomisin B	ABCB1	rs
Panaxytriol	ABCB1	rs
20(s)-protopanaxadiol	ABCB1	rs
(3R,5R,8R,9R,10R,12R,13R,14R,17S)-17-[(2S)-2-hydroxy-6-methylhept-5-en-2-yl]-4,4,8,10,14-pentamethyl-2,3,5,6,7,9,11,12,13,15,16,17-dodecahydro-1H-cyclopenta[a]phenanthrene-3,12-diol	ABCB1	rs
(3S,5R,8R,9R,10R,12R,13R,14R,17S)-17-[(2S)-2-hydroxy-6-methylhept-5-en-2-yl]-4,4,8,10,14-pentamethyl-2,3,5,6,7,9,11,12,13,15,16,17-dodecahydro-1H-cyclopenta[a]phenanthrene-3,12-diol	ABCB1	rs
Folinic acid	ABCB1	rs
Folinic acid	ABCC1	rs
Folinic acid	ABCC2	rs
Folinic acid	ABCG2	rs
(3S,5R,6S,8R,9R,10R,12R,13R,14R,17S)-17-[(2S)-2-hydroxy-6-methylhept-5-en-2-yl]-4,4,8,10,14-pentamethyl-2,3,5,6,7,9,11,12,13,15,16,17-dodecahydro-1H-cyclopenta[a]phenanthrene-3,6,12-triol	ABCG2	rs
alexandrin	ABCG5	rs
(3S,5R,6S,8R,9R,10R,12R,13R,14R,17S)-17-[(2S)-2-hydroxy-6-methylhept-5-en-2-yl]-4,4,8,10,14-pentamethyl-2,3,5,6,7,9,11,12,13,15,16,17-dodecahydro-1H-cyclopenta[a]phenanthrene-3,6,12-triol	ABCG5	rs
alexandrin	ABCG8	rs
(3S,5R,6S,8R,9R,10R,12R,13R,14R,17S)-17-[(2S)-2-hydroxy-6-methylhept-5-en-2-yl]-4,4,8,10,14-pentamethyl-2,3,5,6,7,9,11,12,13,15,16,17-dodecahydro-1H-cyclopenta[a]phenanthrene-3,6,12-triol	ABCG8	rs
kaempferol	ACHE	rs
Frutinone A	ACHE	rs
Gomisin B	ACHE	rs
Panaxytriol	ACHE	rs
Vulgarin	ACHE	rs
alexandrin	ACHE	rs
(3S,5R,6S,8R,9R,10R,12R,13R,14R,17S)-17-[(2S)-2-hydroxy-6-methylhept-5-en-2-yl]-4,4,8,10,14-pentamethyl-2,3,5,6,7,9,11,12,13,15,16,17-dodecahydro-1H-cyclopenta[a]phenanthrene-3,6,12-triol	ACHE	rs
Campesteryl ferulate	ADIPOQ	rs
Linoleic	ADRA2B	rs
Stigmasterol	ADRB1	rs
Linoleic	ADRB1	rs
beta-sitosterol	ADRB2	rs
Stigmasterol	ADRB2	rs
DBP	ADRB2	rs
Linoleic	ADRB2	rs
Fumarine	ADRB2	rs
Diop	ADRB2	rs
Inermin	ADRB2	rs
Aposiopolamine	ADRB2	rs
Frutinone A	ADRB2	rs
Girinimbin	ADRB2	rs
suchilactone	ADRB2	rs
Folinic acid	AFP	rs
Stigmasterol	AKR1B1	rs
alexandrin	AKR1B1	rs
(3S,5R,6S,8R,9R,10R,12R,13R,14R,17S)-17-[(2S)-2-hydroxy-6-methylhept-5-en-2-yl]-4,4,8,10,14-pentamethyl-2,3,5,6,7,9,11,12,13,15,16,17-dodecahydro-1H-cyclopenta[a]phenanthrene-3,6,12-triol	AKR1B1	rs
(3S,5R,6S,8R,9R,10R,12R,13R,14R,17S)-17-[(2R)-2-hydroxy-6-methylhept-5-en-2-yl]-4,4,8,10,14-pentamethyl-2,3,5,6,7,9,11,12,13,15,16,17-dodecahydro-1H-cyclopenta[a]phenanthrene-3,6,12-triol	AKR1B1	rs
kaempferol	AKT1	rs
Gomisin B	AKT1	rs
Panaxytriol	AKT1	rs
20(s)-protopanaxadiol	AKT1	rs
(3R,5R,8R,9R,10R,12R,13R,14R,17S)-17-[(2S)-2-hydroxy-6-methylhept-5-en-2-yl]-4,4,8,10,14-pentamethyl-2,3,5,6,7,9,11,12,13,15,16,17-dodecahydro-1H-cyclopenta[a]phenanthrene-3,12-diol	AKT1	rs
(3S,5R,8R,9R,10R,12R,13R,14R,17S)-17-[(2S)-2-hydroxy-6-methylhept-5-en-2-yl]-4,4,8,10,14-pentamethyl-2,3,5,6,7,9,11,12,13,15,16,17-dodecahydro-1H-cyclopenta[a]phenanthrene-3,12-diol	AKT1	rs
alexandrin	AKT1	rs
(3S,5R,6S,8R,9R,10R,12R,13R,14R,17S)-17-[(2S)-2-hydroxy-6-methylhept-5-en-2-yl]-4,4,8,10,14-pentamethyl-2,3,5,6,7,9,11,12,13,15,16,17-dodecahydro-1H-cyclopenta[a]phenanthrene-3,6,12-triol	AKT1	rs
(3S,5R,6S,8R,9R,10R,12R,13R,14R,17S)-17-[(2R)-2-hydroxy-6-methylhept-5-en-2-yl]-4,4,8,10,14-pentamethyl-2,3,5,6,7,9,11,12,13,15,16,17-dodecahydro-1H-cyclopenta[a]phenanthrene-3,6,12-triol	AKT1	rs
Folinic acid	ALB	rs
kaempferol	ALOX5	rs
Gomisin B	ALPL	rs
Panaxytriol	ALPL	rs
Folinic acid	ALPL	rs
20(s)-protopanaxadiol	ANXA5	rs
(3R,5R,8R,9R,10R,12R,13R,14R,17S)-17-[(2S)-2-hydroxy-6-methylhept-5-en-2-yl]-4,4,8,10,14-pentamethyl-2,3,5,6,7,9,11,12,13,15,16,17-dodecahydro-1H-cyclopenta[a]phenanthrene-3,12-diol	ANXA5	rs
(3S,5R,8R,9R,10R,12R,13R,14R,17S)-17-[(2S)-2-hydroxy-6-methylhept-5-en-2-yl]-4,4,8,10,14-pentamethyl-2,3,5,6,7,9,11,12,13,15,16,17-dodecahydro-1H-cyclopenta[a]phenanthrene-3,12-diol	ANXA5	rs
alexandrin	ANXA5	rs
(3S,5R,6S,8R,9R,10R,12R,13R,14R,17S)-17-[(2S)-2-hydroxy-6-methylhept-5-en-2-yl]-4,4,8,10,14-pentamethyl-2,3,5,6,7,9,11,12,13,15,16,17-dodecahydro-1H-cyclopenta[a]phenanthrene-3,6,12-triol	ANXA5	rs
(3S,5R,6S,8R,9R,10R,12R,13R,14R,17S)-17-[(2R)-2-hydroxy-6-methylhept-5-en-2-yl]-4,4,8,10,14-pentamethyl-2,3,5,6,7,9,11,12,13,15,16,17-dodecahydro-1H-cyclopenta[a]phenanthrene-3,6,12-triol	ANXA5	rs
(3S,5R,6S,8R,9R,10R,12R,13R,14R,17S)-17-[(2S)-2-hydroxy-6-methylhept-5-en-2-yl]-4,4,8,10,14-pentamethyl-2,3,5,6,7,9,11,12,13,15,16,17-dodecahydro-1H-cyclopenta[a]phenanthrene-3,6,12-triol	APOE	rs
kaempferol	AR	rs
Deoxyharringtonine	AR	rs
Frutinone A	AR	rs
20(s)-protopanaxadiol	AR	rs
(3R,5R,8R,9R,10R,12R,13R,14R,17S)-17-[(2S)-2-hydroxy-6-methylhept-5-en-2-yl]-4,4,8,10,14-pentamethyl-2,3,5,6,7,9,11,12,13,15,16,17-dodecahydro-1H-cyclopenta[a]phenanthrene-3,12-diol	AR	rs
(3S,5R,8R,9R,10R,12R,13R,14R,17S)-17-[(2S)-2-hydroxy-6-methylhept-5-en-2-yl]-4,4,8,10,14-pentamethyl-2,3,5,6,7,9,11,12,13,15,16,17-dodecahydro-1H-cyclopenta[a]phenanthrene-3,12-diol	AR	rs
beta-sitosterol	BAX	rs
kaempferol	BAX	rs
ginsenoside rh2	BAX	rs
alexandrin	BCHE	rs
(3S,5R,6S,8R,9R,10R,12R,13R,14R,17S)-17-[(2S)-2-hydroxy-6-methylhept-5-en-2-yl]-4,4,8,10,14-pentamethyl-2,3,5,6,7,9,11,12,13,15,16,17-dodecahydro-1H-cyclopenta[a]phenanthrene-3,6,12-triol	BCHE	rs
beta-sitosterol	BCL2	rs
kaempferol	BCL2	rs
20(s)-protopanaxadiol	BCL2	rs
(3R,5R,8R,9R,10R,12R,13R,14R,17S)-17-[(2S)-2-hydroxy-6-methylhept-5-en-2-yl]-4,4,8,10,14-pentamethyl-2,3,5,6,7,9,11,12,13,15,16,17-dodecahydro-1H-cyclopenta[a]phenanthrene-3,12-diol	BCL2	rs
(3S,5R,8R,9R,10R,12R,13R,14R,17S)-17-[(2S)-2-hydroxy-6-methylhept-5-en-2-yl]-4,4,8,10,14-pentamethyl-2,3,5,6,7,9,11,12,13,15,16,17-dodecahydro-1H-cyclopenta[a]phenanthrene-3,12-diol	BCL2	rs
Folinic acid	BCL2	rs
alexandrin	BCL2	rs
(3S,5R,6S,8R,9R,10R,12R,13R,14R,17S)-17-[(2S)-2-hydroxy-6-methylhept-5-en-2-yl]-4,4,8,10,14-pentamethyl-2,3,5,6,7,9,11,12,13,15,16,17-dodecahydro-1H-cyclopenta[a]phenanthrene-3,6,12-triol	BCL2	rs
(3S,5R,6S,8R,9R,10R,12R,13R,14R,17S)-17-[(2R)-2-hydroxy-6-methylhept-5-en-2-yl]-4,4,8,10,14-pentamethyl-2,3,5,6,7,9,11,12,13,15,16,17-dodecahydro-1H-cyclopenta[a]phenanthrene-3,6,12-triol	BCL2	rs
alexandrin	BCL2L1	rs
(3S,5R,6S,8R,9R,10R,12R,13R,14R,17S)-17-[(2S)-2-hydroxy-6-methylhept-5-en-2-yl]-4,4,8,10,14-pentamethyl-2,3,5,6,7,9,11,12,13,15,16,17-dodecahydro-1H-cyclopenta[a]phenanthrene-3,6,12-triol	BCL2L1	rs
(3S,5R,6S,8R,9R,10R,12R,13R,14R,17S)-17-[(2S)-2-hydroxy-6-methylhept-5-en-2-yl]-4,4,8,10,14-pentamethyl-2,3,5,6,7,9,11,12,13,15,16,17-dodecahydro-1H-cyclopenta[a]phenanthrene-3,6,12-triol	BMP2	rs
(3S,5R,6S,8R,9R,10R,12R,13R,14R,17S)-17-[(2R)-2-hydroxy-6-methylhept-5-en-2-yl]-4,4,8,10,14-pentamethyl-2,3,5,6,7,9,11,12,13,15,16,17-dodecahydro-1H-cyclopenta[a]phenanthrene-3,6,12-triol	BMP2	rs
(3S,5R,6S,8R,9R,10R,12R,13R,14R,17S)-17-[(2S)-2-hydroxy-6-methylhept-5-en-2-yl]-4,4,8,10,14-pentamethyl-2,3,5,6,7,9,11,12,13,15,16,17-dodecahydro-1H-cyclopenta[a]phenanthrene-3,6,12-triol	BMPR2	rs
(3S,5R,6S,8R,9R,10R,12R,13R,14R,17S)-17-[(2R)-2-hydroxy-6-methylhept-5-en-2-yl]-4,4,8,10,14-pentamethyl-2,3,5,6,7,9,11,12,13,15,16,17-dodecahydro-1H-cyclopenta[a]phenanthrene-3,6,12-triol	BMPR2	rs
Folinic acid	BRAF	rs
Dauricine (8CI)	CA2	rs
kaempferol	CALM2	rs
Fumarine	CALM2	rs
9-HEXADECENOIC ACID	CALM2	rs
Inermin	CALM2	rs
suchilactone	CALM2	rs
Nepetin	CALM2	rs
beta-sitosterol	CASP3	rs
kaempferol	CASP3	rs
Chrysanthemaxanthin	CASP3	rs
ginsenoside rh2	CASP3	rs
20(s)-protopanaxadiol	CASP3	rs
(3R,5R,8R,9R,10R,12R,13R,14R,17S)-17-[(2S)-2-hydroxy-6-methylhept-5-en-2-yl]-4,4,8,10,14-pentamethyl-2,3,5,6,7,9,11,12,13,15,16,17-dodecahydro-1H-cyclopenta[a]phenanthrene-3,12-diol	CASP3	rs
(3S,5R,8R,9R,10R,12R,13R,14R,17S)-17-[(2S)-2-hydroxy-6-methylhept-5-en-2-yl]-4,4,8,10,14-pentamethyl-2,3,5,6,7,9,11,12,13,15,16,17-dodecahydro-1H-cyclopenta[a]phenanthrene-3,12-diol	CASP3	rs
alexandrin	CASP3	rs
(3S,5R,6S,8R,9R,10R,12R,13R,14R,17S)-17-[(2S)-2-hydroxy-6-methylhept-5-en-2-yl]-4,4,8,10,14-pentamethyl-2,3,5,6,7,9,11,12,13,15,16,17-dodecahydro-1H-cyclopenta[a]phenanthrene-3,6,12-triol	CASP3	rs
(3S,5R,6S,8R,9R,10R,12R,13R,14R,17S)-17-[(2R)-2-hydroxy-6-methylhept-5-en-2-yl]-4,4,8,10,14-pentamethyl-2,3,5,6,7,9,11,12,13,15,16,17-dodecahydro-1H-cyclopenta[a]phenanthrene-3,6,12-triol	CASP3	rs
beta-sitosterol	CASP8	rs
20(s)-protopanaxadiol	CASP8	rs
(3R,5R,8R,9R,10R,12R,13R,14R,17S)-17-[(2S)-2-hydroxy-6-methylhept-5-en-2-yl]-4,4,8,10,14-pentamethyl-2,3,5,6,7,9,11,12,13,15,16,17-dodecahydro-1H-cyclopenta[a]phenanthrene-3,12-diol	CASP8	rs
(3S,5R,8R,9R,10R,12R,13R,14R,17S)-17-[(2S)-2-hydroxy-6-methylhept-5-en-2-yl]-4,4,8,10,14-pentamethyl-2,3,5,6,7,9,11,12,13,15,16,17-dodecahydro-1H-cyclopenta[a]phenanthrene-3,12-diol	CASP8	rs
(3S,5R,6S,8R,9R,10R,12R,13R,14R,17S)-17-[(2S)-2-hydroxy-6-methylhept-5-en-2-yl]-4,4,8,10,14-pentamethyl-2,3,5,6,7,9,11,12,13,15,16,17-dodecahydro-1H-cyclopenta[a]phenanthrene-3,6,12-triol	CASP8	rs
beta-sitosterol	CASP9	rs
20(s)-protopanaxadiol	CASP9	rs
(3R,5R,8R,9R,10R,12R,13R,14R,17S)-17-[(2S)-2-hydroxy-6-methylhept-5-en-2-yl]-4,4,8,10,14-pentamethyl-2,3,5,6,7,9,11,12,13,15,16,17-dodecahydro-1H-cyclopenta[a]phenanthrene-3,12-diol	CASP9	rs
(3S,5R,8R,9R,10R,12R,13R,14R,17S)-17-[(2S)-2-hydroxy-6-methylhept-5-en-2-yl]-4,4,8,10,14-pentamethyl-2,3,5,6,7,9,11,12,13,15,16,17-dodecahydro-1H-cyclopenta[a]phenanthrene-3,12-diol	CASP9	rs
alexandrin	CASP9	rs
(3S,5R,6S,8R,9R,10R,12R,13R,14R,17S)-17-[(2S)-2-hydroxy-6-methylhept-5-en-2-yl]-4,4,8,10,14-pentamethyl-2,3,5,6,7,9,11,12,13,15,16,17-dodecahydro-1H-cyclopenta[a]phenanthrene-3,6,12-triol	CASP9	rs
20(s)-protopanaxadiol	CAT	rs
(3R,5R,8R,9R,10R,12R,13R,14R,17S)-17-[(2S)-2-hydroxy-6-methylhept-5-en-2-yl]-4,4,8,10,14-pentamethyl-2,3,5,6,7,9,11,12,13,15,16,17-dodecahydro-1H-cyclopenta[a]phenanthrene-3,12-diol	CAT	rs
(3S,5R,8R,9R,10R,12R,13R,14R,17S)-17-[(2S)-2-hydroxy-6-methylhept-5-en-2-yl]-4,4,8,10,14-pentamethyl-2,3,5,6,7,9,11,12,13,15,16,17-dodecahydro-1H-cyclopenta[a]phenanthrene-3,12-diol	CAT	rs
alexandrin	CAT	rs
(3S,5R,6S,8R,9R,10R,12R,13R,14R,17S)-17-[(2S)-2-hydroxy-6-methylhept-5-en-2-yl]-4,4,8,10,14-pentamethyl-2,3,5,6,7,9,11,12,13,15,16,17-dodecahydro-1H-cyclopenta[a]phenanthrene-3,6,12-triol	CAT	rs
(3S,5R,6S,8R,9R,10R,12R,13R,14R,17S)-17-[(2R)-2-hydroxy-6-methylhept-5-en-2-yl]-4,4,8,10,14-pentamethyl-2,3,5,6,7,9,11,12,13,15,16,17-dodecahydro-1H-cyclopenta[a]phenanthrene-3,6,12-triol	CAT	rs
alexandrin	CCK	rs
(3S,5R,6S,8R,9R,10R,12R,13R,14R,17S)-17-[(2S)-2-hydroxy-6-methylhept-5-en-2-yl]-4,4,8,10,14-pentamethyl-2,3,5,6,7,9,11,12,13,15,16,17-dodecahydro-1H-cyclopenta[a]phenanthrene-3,6,12-triol	CCK	rs
20(s)-protopanaxadiol	CCND1	rs
(3R,5R,8R,9R,10R,12R,13R,14R,17S)-17-[(2S)-2-hydroxy-6-methylhept-5-en-2-yl]-4,4,8,10,14-pentamethyl-2,3,5,6,7,9,11,12,13,15,16,17-dodecahydro-1H-cyclopenta[a]phenanthrene-3,12-diol	CCND1	rs
(3S,5R,8R,9R,10R,12R,13R,14R,17S)-17-[(2S)-2-hydroxy-6-methylhept-5-en-2-yl]-4,4,8,10,14-pentamethyl-2,3,5,6,7,9,11,12,13,15,16,17-dodecahydro-1H-cyclopenta[a]phenanthrene-3,12-diol	CCND1	rs
Folinic acid	CD274	rs
Folinic acid	CD4	rs
alexandrin	CD4	rs
(3S,5R,6S,8R,9R,10R,12R,13R,14R,17S)-17-[(2S)-2-hydroxy-6-methylhept-5-en-2-yl]-4,4,8,10,14-pentamethyl-2,3,5,6,7,9,11,12,13,15,16,17-dodecahydro-1H-cyclopenta[a]phenanthrene-3,6,12-triol	CD4	rs
kaempferol	CD40LG	rs
ginsenoside rh2	CD40LG	rs
Folinic acid	CD40LG	rs
alexandrin	CD40LG	rs
(3S,5R,6S,8R,9R,10R,12R,13R,14R,17S)-17-[(2S)-2-hydroxy-6-methylhept-5-en-2-yl]-4,4,8,10,14-pentamethyl-2,3,5,6,7,9,11,12,13,15,16,17-dodecahydro-1H-cyclopenta[a]phenanthrene-3,6,12-triol	CD40LG	rs
(3S,5R,6S,8R,9R,10R,12R,13R,14R,17S)-17-[(2R)-2-hydroxy-6-methylhept-5-en-2-yl]-4,4,8,10,14-pentamethyl-2,3,5,6,7,9,11,12,13,15,16,17-dodecahydro-1H-cyclopenta[a]phenanthrene-3,6,12-triol	CD40LG	rs
Folinic acid	CD8A	rs
20(s)-protopanaxadiol	CDH1	rs
(3R,5R,8R,9R,10R,12R,13R,14R,17S)-17-[(2S)-2-hydroxy-6-methylhept-5-en-2-yl]-4,4,8,10,14-pentamethyl-2,3,5,6,7,9,11,12,13,15,16,17-dodecahydro-1H-cyclopenta[a]phenanthrene-3,12-diol	CDH1	rs
(3S,5R,8R,9R,10R,12R,13R,14R,17S)-17-[(2S)-2-hydroxy-6-methylhept-5-en-2-yl]-4,4,8,10,14-pentamethyl-2,3,5,6,7,9,11,12,13,15,16,17-dodecahydro-1H-cyclopenta[a]phenanthrene-3,12-diol	CDH1	rs
kaempferol	CDK1	rs
20(s)-protopanaxadiol	CDKN1A	rs
(3R,5R,8R,9R,10R,12R,13R,14R,17S)-17-[(2S)-2-hydroxy-6-methylhept-5-en-2-yl]-4,4,8,10,14-pentamethyl-2,3,5,6,7,9,11,12,13,15,16,17-dodecahydro-1H-cyclopenta[a]phenanthrene-3,12-diol	CDKN1A	rs
(3S,5R,8R,9R,10R,12R,13R,14R,17S)-17-[(2S)-2-hydroxy-6-methylhept-5-en-2-yl]-4,4,8,10,14-pentamethyl-2,3,5,6,7,9,11,12,13,15,16,17-dodecahydro-1H-cyclopenta[a]phenanthrene-3,12-diol	CDKN1A	rs
Folinic acid	CDKN2A	rs
20(s)-protopanaxadiol	CEBPA	rs
(3R,5R,8R,9R,10R,12R,13R,14R,17S)-17-[(2S)-2-hydroxy-6-methylhept-5-en-2-yl]-4,4,8,10,14-pentamethyl-2,3,5,6,7,9,11,12,13,15,16,17-dodecahydro-1H-cyclopenta[a]phenanthrene-3,12-diol	CEBPA	rs
(3S,5R,8R,9R,10R,12R,13R,14R,17S)-17-[(2S)-2-hydroxy-6-methylhept-5-en-2-yl]-4,4,8,10,14-pentamethyl-2,3,5,6,7,9,11,12,13,15,16,17-dodecahydro-1H-cyclopenta[a]phenanthrene-3,12-diol	CEBPA	rs
alloaromadedrene	CHRM2	rs
beta-sitosterol	CHRM2	rs
kaempferol	CHRM2	rs
Stigmasterol	CHRM2	rs
DBP	CHRM2	rs
Linoleic	CHRM2	rs
Hepanal	CHRM2	rs
(+)-Maalioxide	CHRM2	rs
Gomisin B	CHRM2	rs
Panaxytriol	CHRM2	rs
cis-Widdrol alpha-epoxide	CHRM2	rs
alloaromadedrene	CHRM3	rs
beta-sitosterol	CHRM3	rs
Stigmasterol	CHRM3	rs
DBP	CHRM3	rs
Fumarine	CHRM3	rs
Hepanal	CHRM3	rs
Diop	CHRM3	rs
Inermin	CHRM3	rs
(+)-Maalioxide	CHRM3	rs
Aposiopolamine	CHRM3	rs
cis-Widdrol alpha-epoxide	CHRM3	rs
Folinic acid	CRP	rs
Folinic acid	CSF2	rs
Folinic acid	CSF3	rs
20(s)-protopanaxadiol	CTNNB1	rs
(3S,5R,8R,9R,10R,12R,13R,14R,17S)-17-[(2S)-2-hydroxy-6-methylhept-5-en-2-yl]-4,4,8,10,14-pentamethyl-2,3,5,6,7,9,11,12,13,15,16,17-dodecahydro-1H-cyclopenta[a]phenanthrene-3,12-diol	CTNNB1	rs
darutoside	CXCL8	rs
kaempferol	CYP1A1	rs
Gomisin B	CYP1A2	rs
Panaxytriol	CYP1A2	rs
kaempferol	CYP1B1	rs
Gomisin B	CYP2C19	rs
Panaxytriol	CYP2C19	rs
Gomisin B	CYP2C9	rs
Panaxytriol	CYP2C9	rs
Gomisin B	CYP2D6	rs
Panaxytriol	CYP2D6	rs
(3S,5R,6S,8R,9R,10R,12R,13R,14R,17S)-17-[(2S)-2-hydroxy-6-methylhept-5-en-2-yl]-4,4,8,10,14-pentamethyl-2,3,5,6,7,9,11,12,13,15,16,17-dodecahydro-1H-cyclopenta[a]phenanthrene-3,6,12-triol	CYP2D6	rs
kaempferol	CYP3A4	rs
Gomisin B	CYP3A4	rs
Gomisin B	CYP3A4	rs
Panaxytriol	CYP3A4	rs
20(s)-protopanaxadiol	CYP3A4	rs
(3R,5R,8R,9R,10R,12R,13R,14R,17S)-17-[(2S)-2-hydroxy-6-methylhept-5-en-2-yl]-4,4,8,10,14-pentamethyl-2,3,5,6,7,9,11,12,13,15,16,17-dodecahydro-1H-cyclopenta[a]phenanthrene-3,12-diol	CYP3A4	rs
(3S,5R,8R,9R,10R,12R,13R,14R,17S)-17-[(2S)-2-hydroxy-6-methylhept-5-en-2-yl]-4,4,8,10,14-pentamethyl-2,3,5,6,7,9,11,12,13,15,16,17-dodecahydro-1H-cyclopenta[a]phenanthrene-3,12-diol	CYP3A4	rs
(3S,5R,6S,8R,9R,10R,12R,13R,14R,17S)-17-[(2S)-2-hydroxy-6-methylhept-5-en-2-yl]-4,4,8,10,14-pentamethyl-2,3,5,6,7,9,11,12,13,15,16,17-dodecahydro-1H-cyclopenta[a]phenanthrene-3,6,12-triol	CYP3A4	rs
(3S,5R,6S,8R,9R,10R,12R,13R,14R,17S)-17-[(2R)-2-hydroxy-6-methylhept-5-en-2-yl]-4,4,8,10,14-pentamethyl-2,3,5,6,7,9,11,12,13,15,16,17-dodecahydro-1H-cyclopenta[a]phenanthrene-3,6,12-triol	CYP3A4	rs
Folinic acid	DHFR	rs
(3R,5R,8R,9R,10R,12R,13R,14R,17S)-17-[(2S)-2-hydroxy-6-methylhept-5-en-2-yl]-4,4,8,10,14-pentamethyl-2,3,5,6,7,9,11,12,13,15,16,17-dodecahydro-1H-cyclopenta[a]phenanthrene-3,12-diol	DLD	rs
(3S,5R,6S,8R,9R,10R,12R,13R,14R,17S)-17-[(2S)-2-hydroxy-6-methylhept-5-en-2-yl]-4,4,8,10,14-pentamethyl-2,3,5,6,7,9,11,12,13,15,16,17-dodecahydro-1H-cyclopenta[a]phenanthrene-3,6,12-triol	DLD	rs
(3S,5R,6S,8R,9R,10R,12R,13R,14R,17S)-17-[(2R)-2-hydroxy-6-methylhept-5-en-2-yl]-4,4,8,10,14-pentamethyl-2,3,5,6,7,9,11,12,13,15,16,17-dodecahydro-1H-cyclopenta[a]phenanthrene-3,6,12-triol	DLD	rs
methyl (Z)-icos-11-enoate	DLK1	rs
Nepetin	DPP4	rs
Folinic acid	DPYD	rs
Folinic acid	EGF	rs
alexandrin	EGF	rs
(3S,5R,6S,8R,9R,10R,12R,13R,14R,17S)-17-[(2S)-2-hydroxy-6-methylhept-5-en-2-yl]-4,4,8,10,14-pentamethyl-2,3,5,6,7,9,11,12,13,15,16,17-dodecahydro-1H-cyclopenta[a]phenanthrene-3,6,12-triol	EGF	rs
Gomisin B	EGFR	rs
Panaxytriol	EGFR	rs
20(s)-protopanaxadiol	EGFR	rs
(3R,5R,8R,9R,10R,12R,13R,14R,17S)-17-[(2S)-2-hydroxy-6-methylhept-5-en-2-yl]-4,4,8,10,14-pentamethyl-2,3,5,6,7,9,11,12,13,15,16,17-dodecahydro-1H-cyclopenta[a]phenanthrene-3,12-diol	EGFR	rs
(3S,5R,8R,9R,10R,12R,13R,14R,17S)-17-[(2S)-2-hydroxy-6-methylhept-5-en-2-yl]-4,4,8,10,14-pentamethyl-2,3,5,6,7,9,11,12,13,15,16,17-dodecahydro-1H-cyclopenta[a]phenanthrene-3,12-diol	EGFR	rs
Folinic acid	EGFR	rs
alexandrin	EGFR	rs
(3S,5R,6S,8R,9R,10R,12R,13R,14R,17S)-17-[(2S)-2-hydroxy-6-methylhept-5-en-2-yl]-4,4,8,10,14-pentamethyl-2,3,5,6,7,9,11,12,13,15,16,17-dodecahydro-1H-cyclopenta[a]phenanthrene-3,6,12-triol	EGFR	rs
Folinic acid	EPCAM	rs
Folinic acid	ERBB2	rs
Folinic acid	ERCC1	rs
Folinic acid	ERCC2	rs
Gomisin B	ESR1	rs
Panaxytriol	ESR1	rs
20(s)-protopanaxadiol	ESR1	rs
(3R,5R,8R,9R,10R,12R,13R,14R,17S)-17-[(2S)-2-hydroxy-6-methylhept-5-en-2-yl]-4,4,8,10,14-pentamethyl-2,3,5,6,7,9,11,12,13,15,16,17-dodecahydro-1H-cyclopenta[a]phenanthrene-3,12-diol	ESR1	rs
(3S,5R,8R,9R,10R,12R,13R,14R,17S)-17-[(2S)-2-hydroxy-6-methylhept-5-en-2-yl]-4,4,8,10,14-pentamethyl-2,3,5,6,7,9,11,12,13,15,16,17-dodecahydro-1H-cyclopenta[a]phenanthrene-3,12-diol	ESR1	rs
(3S,5R,6S,8R,9R,10R,12R,13R,14R,17S)-17-[(2S)-2-hydroxy-6-methylhept-5-en-2-yl]-4,4,8,10,14-pentamethyl-2,3,5,6,7,9,11,12,13,15,16,17-dodecahydro-1H-cyclopenta[a]phenanthrene-3,6,12-triol	ESR1	rs
(3S,5R,6S,8R,9R,10R,12R,13R,14R,17S)-17-[(2R)-2-hydroxy-6-methylhept-5-en-2-yl]-4,4,8,10,14-pentamethyl-2,3,5,6,7,9,11,12,13,15,16,17-dodecahydro-1H-cyclopenta[a]phenanthrene-3,6,12-triol	ESR1	rs
kaempferol	F7	rs
Fumarine	F7	rs
suchilactone	F7	rs
Nepetin	F7	rs
alexandrin	F9	rs
(3S,5R,6S,8R,9R,10R,12R,13R,14R,17S)-17-[(2S)-2-hydroxy-6-methylhept-5-en-2-yl]-4,4,8,10,14-pentamethyl-2,3,5,6,7,9,11,12,13,15,16,17-dodecahydro-1H-cyclopenta[a]phenanthrene-3,6,12-triol	F9	rs
(3S,5R,6S,8R,9R,10R,12R,13R,14R,17S)-17-[(2S)-2-hydroxy-6-methylhept-5-en-2-yl]-4,4,8,10,14-pentamethyl-2,3,5,6,7,9,11,12,13,15,16,17-dodecahydro-1H-cyclopenta[a]phenanthrene-3,6,12-triol	FABP4	rs
Ditertbutyl phthalate	FOS	rs
20(s)-protopanaxadiol	FOS	rs
(3R,5R,8R,9R,10R,12R,13R,14R,17S)-17-[(2S)-2-hydroxy-6-methylhept-5-en-2-yl]-4,4,8,10,14-pentamethyl-2,3,5,6,7,9,11,12,13,15,16,17-dodecahydro-1H-cyclopenta[a]phenanthrene-3,12-diol	FOS	rs
(3S,5R,8R,9R,10R,12R,13R,14R,17S)-17-[(2S)-2-hydroxy-6-methylhept-5-en-2-yl]-4,4,8,10,14-pentamethyl-2,3,5,6,7,9,11,12,13,15,16,17-dodecahydro-1H-cyclopenta[a]phenanthrene-3,12-diol	FOS	rs
20(s)-protopanaxadiol	FOXO1	rs
(3R,5R,8R,9R,10R,12R,13R,14R,17S)-17-[(2S)-2-hydroxy-6-methylhept-5-en-2-yl]-4,4,8,10,14-pentamethyl-2,3,5,6,7,9,11,12,13,15,16,17-dodecahydro-1H-cyclopenta[a]phenanthrene-3,12-diol	FOXO1	rs
(3S,5R,8R,9R,10R,12R,13R,14R,17S)-17-[(2S)-2-hydroxy-6-methylhept-5-en-2-yl]-4,4,8,10,14-pentamethyl-2,3,5,6,7,9,11,12,13,15,16,17-dodecahydro-1H-cyclopenta[a]phenanthrene-3,12-diol	FOXO1	rs
alexandrin	FOXP3	rs
(3S,5R,6S,8R,9R,10R,12R,13R,14R,17S)-17-[(2S)-2-hydroxy-6-methylhept-5-en-2-yl]-4,4,8,10,14-pentamethyl-2,3,5,6,7,9,11,12,13,15,16,17-dodecahydro-1H-cyclopenta[a]phenanthrene-3,6,12-triol	FOXP3	rs
(3R,5R,8R,9R,10R,12R,13R,14R,17S)-17-[(2S)-2-hydroxy-6-methylhept-5-en-2-yl]-4,4,8,10,14-pentamethyl-2,3,5,6,7,9,11,12,13,15,16,17-dodecahydro-1H-cyclopenta[a]phenanthrene-3,12-diol	GABPA	rs
(3S,5R,6S,8R,9R,10R,12R,13R,14R,17S)-17-[(2S)-2-hydroxy-6-methylhept-5-en-2-yl]-4,4,8,10,14-pentamethyl-2,3,5,6,7,9,11,12,13,15,16,17-dodecahydro-1H-cyclopenta[a]phenanthrene-3,6,12-triol	GABPA	rs
(3S,5R,6S,8R,9R,10R,12R,13R,14R,17S)-17-[(2R)-2-hydroxy-6-methylhept-5-en-2-yl]-4,4,8,10,14-pentamethyl-2,3,5,6,7,9,11,12,13,15,16,17-dodecahydro-1H-cyclopenta[a]phenanthrene-3,6,12-triol	GABPA	rs
(3R,5R,8R,9R,10R,12R,13R,14R,17S)-17-[(2S)-2-hydroxy-6-methylhept-5-en-2-yl]-4,4,8,10,14-pentamethyl-2,3,5,6,7,9,11,12,13,15,16,17-dodecahydro-1H-cyclopenta[a]phenanthrene-3,12-diol	GLB1	rs
(3S,5R,6S,8R,9R,10R,12R,13R,14R,17S)-17-[(2S)-2-hydroxy-6-methylhept-5-en-2-yl]-4,4,8,10,14-pentamethyl-2,3,5,6,7,9,11,12,13,15,16,17-dodecahydro-1H-cyclopenta[a]phenanthrene-3,6,12-triol	GLB1	rs
(3S,5R,6S,8R,9R,10R,12R,13R,14R,17S)-17-[(2R)-2-hydroxy-6-methylhept-5-en-2-yl]-4,4,8,10,14-pentamethyl-2,3,5,6,7,9,11,12,13,15,16,17-dodecahydro-1H-cyclopenta[a]phenanthrene-3,6,12-triol	GLB1	rs
Gomisin B	GPT	rs
Panaxytriol	GPT	rs
Folinic acid	GPT	rs
alexandrin	GPT	rs
(3S,5R,6S,8R,9R,10R,12R,13R,14R,17S)-17-[(2S)-2-hydroxy-6-methylhept-5-en-2-yl]-4,4,8,10,14-pentamethyl-2,3,5,6,7,9,11,12,13,15,16,17-dodecahydro-1H-cyclopenta[a]phenanthrene-3,6,12-triol	GPT	rs
(3R,5R,8R,9R,10R,12R,13R,14R,17S)-17-[(2S)-2-hydroxy-6-methylhept-5-en-2-yl]-4,4,8,10,14-pentamethyl-2,3,5,6,7,9,11,12,13,15,16,17-dodecahydro-1H-cyclopenta[a]phenanthrene-3,12-diol	GRB2	rs
DBP	GSK3B	rs
kaempferol	GSTM1	rs
Folinic acid	GSTP1	rs
20(s)-protopanaxadiol	HIF1A	rs
(3R,5R,8R,9R,10R,12R,13R,14R,17S)-17-[(2S)-2-hydroxy-6-methylhept-5-en-2-yl]-4,4,8,10,14-pentamethyl-2,3,5,6,7,9,11,12,13,15,16,17-dodecahydro-1H-cyclopenta[a]phenanthrene-3,12-diol	HIF1A	rs
(3S,5R,8R,9R,10R,12R,13R,14R,17S)-17-[(2S)-2-hydroxy-6-methylhept-5-en-2-yl]-4,4,8,10,14-pentamethyl-2,3,5,6,7,9,11,12,13,15,16,17-dodecahydro-1H-cyclopenta[a]phenanthrene-3,12-diol	HIF1A	rs
(3R,5R,8R,9R,10R,12R,13R,14R,17S)-17-[(2S)-2-hydroxy-6-methylhept-5-en-2-yl]-4,4,8,10,14-pentamethyl-2,3,5,6,7,9,11,12,13,15,16,17-dodecahydro-1H-cyclopenta[a]phenanthrene-3,12-diol	HMGCR	rs
(3S,5R,8R,9R,10R,12R,13R,14R,17S)-17-[(2S)-2-hydroxy-6-methylhept-5-en-2-yl]-4,4,8,10,14-pentamethyl-2,3,5,6,7,9,11,12,13,15,16,17-dodecahydro-1H-cyclopenta[a]phenanthrene-3,12-diol	HMGCR	rs
kaempferol	HMOX1	rs
20(s)-protopanaxadiol	HMOX1	rs
(3S,5R,8R,9R,10R,12R,13R,14R,17S)-17-[(2S)-2-hydroxy-6-methylhept-5-en-2-yl]-4,4,8,10,14-pentamethyl-2,3,5,6,7,9,11,12,13,15,16,17-dodecahydro-1H-cyclopenta[a]phenanthrene-3,12-diol	HMOX1	rs
Nepetin	HSP90AA1	rs
beta-sitosterol	HTR2A	rs
Stigmasterol	HTR2A	rs
DBP	HTR2A	rs
Fumarine	HTR2A	rs
kaempferol	ICAM1	rs
Folinic acid	IFNA1	rs
Folinic acid	IFNAR1	rs
ginsenoside rh2	IFNG	rs
Folinic acid	IKZF3	rs
methyl (Z)-icos-11-enoate	IL10	rs
alexandrin	IL10	rs
(3S,5R,6S,8R,9R,10R,12R,13R,14R,17S)-17-[(2S)-2-hydroxy-6-methylhept-5-en-2-yl]-4,4,8,10,14-pentamethyl-2,3,5,6,7,9,11,12,13,15,16,17-dodecahydro-1H-cyclopenta[a]phenanthrene-3,6,12-triol	IL10	rs
(3S,5R,6S,8R,9R,10R,12R,13R,14R,17S)-17-[(2R)-2-hydroxy-6-methylhept-5-en-2-yl]-4,4,8,10,14-pentamethyl-2,3,5,6,7,9,11,12,13,15,16,17-dodecahydro-1H-cyclopenta[a]phenanthrene-3,6,12-triol	IL10	rs
Chrysanthemaxanthin	IL17A	rs
ginsenoside rh2	IL1B	rs
Folinic acid	IL2	rs
alexandrin	IL2	rs
(3S,5R,6S,8R,9R,10R,12R,13R,14R,17S)-17-[(2S)-2-hydroxy-6-methylhept-5-en-2-yl]-4,4,8,10,14-pentamethyl-2,3,5,6,7,9,11,12,13,15,16,17-dodecahydro-1H-cyclopenta[a]phenanthrene-3,6,12-triol	IL2	rs
alexandrin	IL4	rs
(3S,5R,6S,8R,9R,10R,12R,13R,14R,17S)-17-[(2S)-2-hydroxy-6-methylhept-5-en-2-yl]-4,4,8,10,14-pentamethyl-2,3,5,6,7,9,11,12,13,15,16,17-dodecahydro-1H-cyclopenta[a]phenanthrene-3,6,12-triol	IL4	rs
(3S,5R,6S,8R,9R,10R,12R,13R,14R,17S)-17-[(2R)-2-hydroxy-6-methylhept-5-en-2-yl]-4,4,8,10,14-pentamethyl-2,3,5,6,7,9,11,12,13,15,16,17-dodecahydro-1H-cyclopenta[a]phenanthrene-3,6,12-triol	IL4	rs
20(s)-protopanaxadiol	IL6	rs
(3R,5R,8R,9R,10R,12R,13R,14R,17S)-17-[(2S)-2-hydroxy-6-methylhept-5-en-2-yl]-4,4,8,10,14-pentamethyl-2,3,5,6,7,9,11,12,13,15,16,17-dodecahydro-1H-cyclopenta[a]phenanthrene-3,12-diol	IL6	rs
(3S,5R,8R,9R,10R,12R,13R,14R,17S)-17-[(2S)-2-hydroxy-6-methylhept-5-en-2-yl]-4,4,8,10,14-pentamethyl-2,3,5,6,7,9,11,12,13,15,16,17-dodecahydro-1H-cyclopenta[a]phenanthrene-3,12-diol	IL6	rs
methyl (Z)-icos-11-enoate	IL6	rs
Folinic acid	IL6	rs
Campesteryl ferulate	IL6	rs
alexandrin	IL6	rs
(3S,5R,6S,8R,9R,10R,12R,13R,14R,17S)-17-[(2S)-2-hydroxy-6-methylhept-5-en-2-yl]-4,4,8,10,14-pentamethyl-2,3,5,6,7,9,11,12,13,15,16,17-dodecahydro-1H-cyclopenta[a]phenanthrene-3,6,12-triol	IL6	rs
(3S,5R,6S,8R,9R,10R,12R,13R,14R,17S)-17-[(2R)-2-hydroxy-6-methylhept-5-en-2-yl]-4,4,8,10,14-pentamethyl-2,3,5,6,7,9,11,12,13,15,16,17-dodecahydro-1H-cyclopenta[a]phenanthrene-3,6,12-triol	IL6	rs
Folinic acid	IL9	rs
20(s)-protopanaxadiol	INS	rs
(3R,5R,8R,9R,10R,12R,13R,14R,17S)-17-[(2S)-2-hydroxy-6-methylhept-5-en-2-yl]-4,4,8,10,14-pentamethyl-2,3,5,6,7,9,11,12,13,15,16,17-dodecahydro-1H-cyclopenta[a]phenanthrene-3,12-diol	INS	rs
(3S,5R,8R,9R,10R,12R,13R,14R,17S)-17-[(2S)-2-hydroxy-6-methylhept-5-en-2-yl]-4,4,8,10,14-pentamethyl-2,3,5,6,7,9,11,12,13,15,16,17-dodecahydro-1H-cyclopenta[a]phenanthrene-3,12-diol	INS	rs
alexandrin	INS	rs
(3S,5R,6S,8R,9R,10R,12R,13R,14R,17S)-17-[(2S)-2-hydroxy-6-methylhept-5-en-2-yl]-4,4,8,10,14-pentamethyl-2,3,5,6,7,9,11,12,13,15,16,17-dodecahydro-1H-cyclopenta[a]phenanthrene-3,6,12-triol	INS	rs
(3S,5R,6S,8R,9R,10R,12R,13R,14R,17S)-17-[(2R)-2-hydroxy-6-methylhept-5-en-2-yl]-4,4,8,10,14-pentamethyl-2,3,5,6,7,9,11,12,13,15,16,17-dodecahydro-1H-cyclopenta[a]phenanthrene-3,6,12-triol	INS	rs
kaempferol	INSR	rs
(3R,5R,8R,9R,10R,12R,13R,14R,17S)-17-[(2S)-2-hydroxy-6-methylhept-5-en-2-yl]-4,4,8,10,14-pentamethyl-2,3,5,6,7,9,11,12,13,15,16,17-dodecahydro-1H-cyclopenta[a]phenanthrene-3,12-diol	IRF3	rs
beta-sitosterol	JUN	rs
kaempferol	JUN	rs
(3S,5R,6S,8R,9R,10R,12R,13R,14R,17S)-17-[(2S)-2-hydroxy-6-methylhept-5-en-2-yl]-4,4,8,10,14-pentamethyl-2,3,5,6,7,9,11,12,13,15,16,17-dodecahydro-1H-cyclopenta[a]phenanthrene-3,6,12-triol	JUN	rs
(3S,5R,6S,8R,9R,10R,12R,13R,14R,17S)-17-[(2R)-2-hydroxy-6-methylhept-5-en-2-yl]-4,4,8,10,14-pentamethyl-2,3,5,6,7,9,11,12,13,15,16,17-dodecahydro-1H-cyclopenta[a]phenanthrene-3,6,12-triol	JUN	rs
beta-sitosterol	KCNH2	rs
Fumarine	KCNH2	rs
suchilactone	KCNH2	rs
Folinic acid	KDR	rs
Folinic acid	KRAS	rs
(3S,5R,6S,8R,9R,10R,12R,13R,14R,17S)-17-[(2S)-2-hydroxy-6-methylhept-5-en-2-yl]-4,4,8,10,14-pentamethyl-2,3,5,6,7,9,11,12,13,15,16,17-dodecahydro-1H-cyclopenta[a]phenanthrene-3,6,12-triol	LRBA	rs
(3S,5R,6S,8R,9R,10R,12R,13R,14R,17S)-17-[(2R)-2-hydroxy-6-methylhept-5-en-2-yl]-4,4,8,10,14-pentamethyl-2,3,5,6,7,9,11,12,13,15,16,17-dodecahydro-1H-cyclopenta[a]phenanthrene-3,6,12-triol	LRBA	rs
Dauricine (8CI)	LYZ	rs
Stigmasterol	MAOA	rs
Dauricine (8CI)	MAOA	rs
Stigmasterol	MAOB	rs
Linoleic	MAOB	rs
N-Salicylidene-salicylamine	MAOB	rs
Dauricine (8CI)	MAOB	rs
Chrysanthemaxanthin	MAPK1	rs
20(s)-protopanaxadiol	MAPK1	rs
(3R,5R,8R,9R,10R,12R,13R,14R,17S)-17-[(2S)-2-hydroxy-6-methylhept-5-en-2-yl]-4,4,8,10,14-pentamethyl-2,3,5,6,7,9,11,12,13,15,16,17-dodecahydro-1H-cyclopenta[a]phenanthrene-3,12-diol	MAPK1	rs
(3S,5R,8R,9R,10R,12R,13R,14R,17S)-17-[(2S)-2-hydroxy-6-methylhept-5-en-2-yl]-4,4,8,10,14-pentamethyl-2,3,5,6,7,9,11,12,13,15,16,17-dodecahydro-1H-cyclopenta[a]phenanthrene-3,12-diol	MAPK1	rs
alexandrin	MAPK1	rs
(3S,5R,6S,8R,9R,10R,12R,13R,14R,17S)-17-[(2S)-2-hydroxy-6-methylhept-5-en-2-yl]-4,4,8,10,14-pentamethyl-2,3,5,6,7,9,11,12,13,15,16,17-dodecahydro-1H-cyclopenta[a]phenanthrene-3,6,12-triol	MAPK1	rs
(3S,5R,6S,8R,9R,10R,12R,13R,14R,17S)-17-[(2R)-2-hydroxy-6-methylhept-5-en-2-yl]-4,4,8,10,14-pentamethyl-2,3,5,6,7,9,11,12,13,15,16,17-dodecahydro-1H-cyclopenta[a]phenanthrene-3,6,12-triol	MAPK1	rs
20(s)-protopanaxadiol	MAPK14	rs
(3R,5R,8R,9R,10R,12R,13R,14R,17S)-17-[(2S)-2-hydroxy-6-methylhept-5-en-2-yl]-4,4,8,10,14-pentamethyl-2,3,5,6,7,9,11,12,13,15,16,17-dodecahydro-1H-cyclopenta[a]phenanthrene-3,12-diol	MAPK14	rs
(3S,5R,8R,9R,10R,12R,13R,14R,17S)-17-[(2S)-2-hydroxy-6-methylhept-5-en-2-yl]-4,4,8,10,14-pentamethyl-2,3,5,6,7,9,11,12,13,15,16,17-dodecahydro-1H-cyclopenta[a]phenanthrene-3,12-diol	MAPK14	rs
(3S,5R,6S,8R,9R,10R,12R,13R,14R,17S)-17-[(2S)-2-hydroxy-6-methylhept-5-en-2-yl]-4,4,8,10,14-pentamethyl-2,3,5,6,7,9,11,12,13,15,16,17-dodecahydro-1H-cyclopenta[a]phenanthrene-3,6,12-triol	MAPK14	rs
(3S,5R,6S,8R,9R,10R,12R,13R,14R,17S)-17-[(2R)-2-hydroxy-6-methylhept-5-en-2-yl]-4,4,8,10,14-pentamethyl-2,3,5,6,7,9,11,12,13,15,16,17-dodecahydro-1H-cyclopenta[a]phenanthrene-3,6,12-triol	MAPK14	rs
20(s)-protopanaxadiol	MAPK8	rs
(3R,5R,8R,9R,10R,12R,13R,14R,17S)-17-[(2S)-2-hydroxy-6-methylhept-5-en-2-yl]-4,4,8,10,14-pentamethyl-2,3,5,6,7,9,11,12,13,15,16,17-dodecahydro-1H-cyclopenta[a]phenanthrene-3,12-diol	MAPK8	rs
(3S,5R,8R,9R,10R,12R,13R,14R,17S)-17-[(2S)-2-hydroxy-6-methylhept-5-en-2-yl]-4,4,8,10,14-pentamethyl-2,3,5,6,7,9,11,12,13,15,16,17-dodecahydro-1H-cyclopenta[a]phenanthrene-3,12-diol	MAPK8	rs
darutoside	MAPK8	rs
(3S,5R,6S,8R,9R,10R,12R,13R,14R,17S)-17-[(2S)-2-hydroxy-6-methylhept-5-en-2-yl]-4,4,8,10,14-pentamethyl-2,3,5,6,7,9,11,12,13,15,16,17-dodecahydro-1H-cyclopenta[a]phenanthrene-3,6,12-triol	MAPK8	rs
(3S,5R,6S,8R,9R,10R,12R,13R,14R,17S)-17-[(2R)-2-hydroxy-6-methylhept-5-en-2-yl]-4,4,8,10,14-pentamethyl-2,3,5,6,7,9,11,12,13,15,16,17-dodecahydro-1H-cyclopenta[a]phenanthrene-3,6,12-triol	MAPK8	rs
20(s)-protopanaxadiol	MDM2	rs
(3R,5R,8R,9R,10R,12R,13R,14R,17S)-17-[(2S)-2-hydroxy-6-methylhept-5-en-2-yl]-4,4,8,10,14-pentamethyl-2,3,5,6,7,9,11,12,13,15,16,17-dodecahydro-1H-cyclopenta[a]phenanthrene-3,12-diol	MDM2	rs
(3S,5R,8R,9R,10R,12R,13R,14R,17S)-17-[(2S)-2-hydroxy-6-methylhept-5-en-2-yl]-4,4,8,10,14-pentamethyl-2,3,5,6,7,9,11,12,13,15,16,17-dodecahydro-1H-cyclopenta[a]phenanthrene-3,12-diol	MDM2	rs
Folinic acid	MKI67	rs
Folinic acid	MLH1	rs
kaempferol	MMP1	rs
20(s)-protopanaxadiol	MMP2	rs
(3R,5R,8R,9R,10R,12R,13R,14R,17S)-17-[(2S)-2-hydroxy-6-methylhept-5-en-2-yl]-4,4,8,10,14-pentamethyl-2,3,5,6,7,9,11,12,13,15,16,17-dodecahydro-1H-cyclopenta[a]phenanthrene-3,12-diol	MMP2	rs
(3S,5R,8R,9R,10R,12R,13R,14R,17S)-17-[(2S)-2-hydroxy-6-methylhept-5-en-2-yl]-4,4,8,10,14-pentamethyl-2,3,5,6,7,9,11,12,13,15,16,17-dodecahydro-1H-cyclopenta[a]phenanthrene-3,12-diol	MMP2	rs
(3S,5R,6S,8R,9R,10R,12R,13R,14R,17S)-17-[(2S)-2-hydroxy-6-methylhept-5-en-2-yl]-4,4,8,10,14-pentamethyl-2,3,5,6,7,9,11,12,13,15,16,17-dodecahydro-1H-cyclopenta[a]phenanthrene-3,6,12-triol	MMP2	rs
(3S,5R,6S,8R,9R,10R,12R,13R,14R,17S)-17-[(2R)-2-hydroxy-6-methylhept-5-en-2-yl]-4,4,8,10,14-pentamethyl-2,3,5,6,7,9,11,12,13,15,16,17-dodecahydro-1H-cyclopenta[a]phenanthrene-3,6,12-triol	MMP2	rs
(3S,5R,6S,8R,9R,10R,12R,13R,14R,17S)-17-[(2S)-2-hydroxy-6-methylhept-5-en-2-yl]-4,4,8,10,14-pentamethyl-2,3,5,6,7,9,11,12,13,15,16,17-dodecahydro-1H-cyclopenta[a]phenanthrene-3,6,12-triol	MPO	rs
(3S,5R,6S,8R,9R,10R,12R,13R,14R,17S)-17-[(2R)-2-hydroxy-6-methylhept-5-en-2-yl]-4,4,8,10,14-pentamethyl-2,3,5,6,7,9,11,12,13,15,16,17-dodecahydro-1H-cyclopenta[a]phenanthrene-3,6,12-triol	MPO	rs
Folinic acid	MSH3	rs
20(s)-protopanaxadiol	MT-CO2	rs
(3R,5R,8R,9R,10R,12R,13R,14R,17S)-17-[(2S)-2-hydroxy-6-methylhept-5-en-2-yl]-4,4,8,10,14-pentamethyl-2,3,5,6,7,9,11,12,13,15,16,17-dodecahydro-1H-cyclopenta[a]phenanthrene-3,12-diol	MT-CO2	rs
(3S,5R,8R,9R,10R,12R,13R,14R,17S)-17-[(2S)-2-hydroxy-6-methylhept-5-en-2-yl]-4,4,8,10,14-pentamethyl-2,3,5,6,7,9,11,12,13,15,16,17-dodecahydro-1H-cyclopenta[a]phenanthrene-3,12-diol	MT-CO2	rs
Folinic acid	MTHFD1	rs
Folinic acid	MTHFR	rs
Gomisin B	MTOR	rs
Panaxytriol	MTOR	rs
20(s)-protopanaxadiol	MTOR	rs
(3R,5R,8R,9R,10R,12R,13R,14R,17S)-17-[(2S)-2-hydroxy-6-methylhept-5-en-2-yl]-4,4,8,10,14-pentamethyl-2,3,5,6,7,9,11,12,13,15,16,17-dodecahydro-1H-cyclopenta[a]phenanthrene-3,12-diol	MTOR	rs
(3S,5R,8R,9R,10R,12R,13R,14R,17S)-17-[(2S)-2-hydroxy-6-methylhept-5-en-2-yl]-4,4,8,10,14-pentamethyl-2,3,5,6,7,9,11,12,13,15,16,17-dodecahydro-1H-cyclopenta[a]phenanthrene-3,12-diol	MTOR	rs
(3S,5R,6S,8R,9R,10R,12R,13R,14R,17S)-17-[(2S)-2-hydroxy-6-methylhept-5-en-2-yl]-4,4,8,10,14-pentamethyl-2,3,5,6,7,9,11,12,13,15,16,17-dodecahydro-1H-cyclopenta[a]phenanthrene-3,6,12-triol	MTOR	rs
(3S,5R,6S,8R,9R,10R,12R,13R,14R,17S)-17-[(2R)-2-hydroxy-6-methylhept-5-en-2-yl]-4,4,8,10,14-pentamethyl-2,3,5,6,7,9,11,12,13,15,16,17-dodecahydro-1H-cyclopenta[a]phenanthrene-3,6,12-triol	MTOR	rs
Folinic acid	MTR	rs
Folinic acid	MUC16	rs
Ditertbutyl phthalate	NFATC1	rs
(3R,5R,8R,9R,10R,12R,13R,14R,17S)-17-[(2S)-2-hydroxy-6-methylhept-5-en-2-yl]-4,4,8,10,14-pentamethyl-2,3,5,6,7,9,11,12,13,15,16,17-dodecahydro-1H-cyclopenta[a]phenanthrene-3,12-diol	NFE2L2	rs
(3S,5R,6S,8R,9R,10R,12R,13R,14R,17S)-17-[(2S)-2-hydroxy-6-methylhept-5-en-2-yl]-4,4,8,10,14-pentamethyl-2,3,5,6,7,9,11,12,13,15,16,17-dodecahydro-1H-cyclopenta[a]phenanthrene-3,6,12-triol	NFKB1	rs
(3S,5R,6S,8R,9R,10R,12R,13R,14R,17S)-17-[(2R)-2-hydroxy-6-methylhept-5-en-2-yl]-4,4,8,10,14-pentamethyl-2,3,5,6,7,9,11,12,13,15,16,17-dodecahydro-1H-cyclopenta[a]phenanthrene-3,6,12-triol	NFKB1	rs
ginsenoside rh2	NFKBIA	rs
20(s)-protopanaxadiol	NFKBIA	rs
(3S,5R,8R,9R,10R,12R,13R,14R,17S)-17-[(2S)-2-hydroxy-6-methylhept-5-en-2-yl]-4,4,8,10,14-pentamethyl-2,3,5,6,7,9,11,12,13,15,16,17-dodecahydro-1H-cyclopenta[a]phenanthrene-3,12-diol	NFKBIA	rs
kaempferol	NOS2	rs
20(s)-protopanaxadiol	NOS2	rs
(3R,5R,8R,9R,10R,12R,13R,14R,17S)-17-[(2S)-2-hydroxy-6-methylhept-5-en-2-yl]-4,4,8,10,14-pentamethyl-2,3,5,6,7,9,11,12,13,15,16,17-dodecahydro-1H-cyclopenta[a]phenanthrene-3,12-diol	NOS2	rs
(3S,5R,8R,9R,10R,12R,13R,14R,17S)-17-[(2S)-2-hydroxy-6-methylhept-5-en-2-yl]-4,4,8,10,14-pentamethyl-2,3,5,6,7,9,11,12,13,15,16,17-dodecahydro-1H-cyclopenta[a]phenanthrene-3,12-diol	NOS2	rs
Campesteryl ferulate	NOS2	rs
(3S,5R,6S,8R,9R,10R,12R,13R,14R,17S)-17-[(2R)-2-hydroxy-6-methylhept-5-en-2-yl]-4,4,8,10,14-pentamethyl-2,3,5,6,7,9,11,12,13,15,16,17-dodecahydro-1H-cyclopenta[a]phenanthrene-3,6,12-triol	NOS3	rs
darutoside	NPPA	rs
(3S,5R,6S,8R,9R,10R,12R,13R,14R,17S)-17-[(2S)-2-hydroxy-6-methylhept-5-en-2-yl]-4,4,8,10,14-pentamethyl-2,3,5,6,7,9,11,12,13,15,16,17-dodecahydro-1H-cyclopenta[a]phenanthrene-3,6,12-triol	NQO1	rs
kaempferol	NR1I3	rs
20(s)-protopanaxadiol	NR3C1	rs
(3R,5R,8R,9R,10R,12R,13R,14R,17S)-17-[(2S)-2-hydroxy-6-methylhept-5-en-2-yl]-4,4,8,10,14-pentamethyl-2,3,5,6,7,9,11,12,13,15,16,17-dodecahydro-1H-cyclopenta[a]phenanthrene-3,12-diol	NR3C1	rs
(3S,5R,8R,9R,10R,12R,13R,14R,17S)-17-[(2S)-2-hydroxy-6-methylhept-5-en-2-yl]-4,4,8,10,14-pentamethyl-2,3,5,6,7,9,11,12,13,15,16,17-dodecahydro-1H-cyclopenta[a]phenanthrene-3,12-diol	NR3C1	rs
(3S,5R,6S,8R,9R,10R,12R,13R,14R,17S)-17-[(2S)-2-hydroxy-6-methylhept-5-en-2-yl]-4,4,8,10,14-pentamethyl-2,3,5,6,7,9,11,12,13,15,16,17-dodecahydro-1H-cyclopenta[a]phenanthrene-3,6,12-triol	NR3C1	rs
(3S,5R,6S,8R,9R,10R,12R,13R,14R,17S)-17-[(2R)-2-hydroxy-6-methylhept-5-en-2-yl]-4,4,8,10,14-pentamethyl-2,3,5,6,7,9,11,12,13,15,16,17-dodecahydro-1H-cyclopenta[a]phenanthrene-3,6,12-triol	NR3C1	rs
Stigmasterol	NR3C2	rs
Deoxyharringtonine	NR3C2	rs
Ginsenoside-Rh4_qt	NR3C2	rs
Folinic acid	NRAS	rs
alexandrin	OCRL	rs
(3S,5R,6S,8R,9R,10R,12R,13R,14R,17S)-17-[(2S)-2-hydroxy-6-methylhept-5-en-2-yl]-4,4,8,10,14-pentamethyl-2,3,5,6,7,9,11,12,13,15,16,17-dodecahydro-1H-cyclopenta[a]phenanthrene-3,6,12-triol	OCRL	rs
beta-sitosterol	OPRM1	rs
Fumarine	OPRM1	rs
20(s)-protopanaxadiol	PARP1	rs
(3R,5R,8R,9R,10R,12R,13R,14R,17S)-17-[(2S)-2-hydroxy-6-methylhept-5-en-2-yl]-4,4,8,10,14-pentamethyl-2,3,5,6,7,9,11,12,13,15,16,17-dodecahydro-1H-cyclopenta[a]phenanthrene-3,12-diol	PARP1	rs
(3S,5R,8R,9R,10R,12R,13R,14R,17S)-17-[(2S)-2-hydroxy-6-methylhept-5-en-2-yl]-4,4,8,10,14-pentamethyl-2,3,5,6,7,9,11,12,13,15,16,17-dodecahydro-1H-cyclopenta[a]phenanthrene-3,12-diol	PARP1	rs
alexandrin	PARP1	rs
(3S,5R,6S,8R,9R,10R,12R,13R,14R,17S)-17-[(2S)-2-hydroxy-6-methylhept-5-en-2-yl]-4,4,8,10,14-pentamethyl-2,3,5,6,7,9,11,12,13,15,16,17-dodecahydro-1H-cyclopenta[a]phenanthrene-3,6,12-triol	PARP1	rs
(3S,5R,6S,8R,9R,10R,12R,13R,14R,17S)-17-[(2R)-2-hydroxy-6-methylhept-5-en-2-yl]-4,4,8,10,14-pentamethyl-2,3,5,6,7,9,11,12,13,15,16,17-dodecahydro-1H-cyclopenta[a]phenanthrene-3,6,12-triol	PARP1	rs
Folinic acid	PDCD1	rs
beta-sitosterol	PDE3A	rs
DBP	PDE3A	rs
Fumarine	PDE3A	rs
Frutinone A	PDE3A	rs
suchilactone	PDE3A	rs
Folinic acid	PGF	rs
Gomisin B	PIK3CA	rs
Gomisin B	PIK3CA	rs
Panaxytriol	PIK3CA	rs
20(s)-protopanaxadiol	PIK3CA	rs
(3R,5R,8R,9R,10R,12R,13R,14R,17S)-17-[(2S)-2-hydroxy-6-methylhept-5-en-2-yl]-4,4,8,10,14-pentamethyl-2,3,5,6,7,9,11,12,13,15,16,17-dodecahydro-1H-cyclopenta[a]phenanthrene-3,12-diol	PIK3CA	rs
(3S,5R,8R,9R,10R,12R,13R,14R,17S)-17-[(2S)-2-hydroxy-6-methylhept-5-en-2-yl]-4,4,8,10,14-pentamethyl-2,3,5,6,7,9,11,12,13,15,16,17-dodecahydro-1H-cyclopenta[a]phenanthrene-3,12-diol	PIK3CA	rs
Folinic acid	PIK3CA	rs
alexandrin	PIK3CA	rs
(3S,5R,6S,8R,9R,10R,12R,13R,14R,17S)-17-[(2S)-2-hydroxy-6-methylhept-5-en-2-yl]-4,4,8,10,14-pentamethyl-2,3,5,6,7,9,11,12,13,15,16,17-dodecahydro-1H-cyclopenta[a]phenanthrene-3,6,12-triol	PIK3CA	rs
(3S,5R,6S,8R,9R,10R,12R,13R,14R,17S)-17-[(2R)-2-hydroxy-6-methylhept-5-en-2-yl]-4,4,8,10,14-pentamethyl-2,3,5,6,7,9,11,12,13,15,16,17-dodecahydro-1H-cyclopenta[a]phenanthrene-3,6,12-triol	PIK3CA	rs
20(s)-protopanaxadiol	PIK3CD	rs
(3S,5R,8R,9R,10R,12R,13R,14R,17S)-17-[(2S)-2-hydroxy-6-methylhept-5-en-2-yl]-4,4,8,10,14-pentamethyl-2,3,5,6,7,9,11,12,13,15,16,17-dodecahydro-1H-cyclopenta[a]phenanthrene-3,12-diol	PIK3CD	rs
(3S,5R,6S,8R,9R,10R,12R,13R,14R,17S)-17-[(2S)-2-hydroxy-6-methylhept-5-en-2-yl]-4,4,8,10,14-pentamethyl-2,3,5,6,7,9,11,12,13,15,16,17-dodecahydro-1H-cyclopenta[a]phenanthrene-3,6,12-triol	PIK3CD	rs
(3S,5R,6S,8R,9R,10R,12R,13R,14R,17S)-17-[(2R)-2-hydroxy-6-methylhept-5-en-2-yl]-4,4,8,10,14-pentamethyl-2,3,5,6,7,9,11,12,13,15,16,17-dodecahydro-1H-cyclopenta[a]phenanthrene-3,6,12-triol	PIK3CD	rs
20(s)-protopanaxadiol	PIK3R1	rs
(3R,5R,8R,9R,10R,12R,13R,14R,17S)-17-[(2S)-2-hydroxy-6-methylhept-5-en-2-yl]-4,4,8,10,14-pentamethyl-2,3,5,6,7,9,11,12,13,15,16,17-dodecahydro-1H-cyclopenta[a]phenanthrene-3,12-diol	PIK3R1	rs
(3S,5R,8R,9R,10R,12R,13R,14R,17S)-17-[(2S)-2-hydroxy-6-methylhept-5-en-2-yl]-4,4,8,10,14-pentamethyl-2,3,5,6,7,9,11,12,13,15,16,17-dodecahydro-1H-cyclopenta[a]phenanthrene-3,12-diol	PIK3R1	rs
(3S,5R,6S,8R,9R,10R,12R,13R,14R,17S)-17-[(2S)-2-hydroxy-6-methylhept-5-en-2-yl]-4,4,8,10,14-pentamethyl-2,3,5,6,7,9,11,12,13,15,16,17-dodecahydro-1H-cyclopenta[a]phenanthrene-3,6,12-triol	PIK3R1	rs
alexandrin	PLAT	rs
Stigmasterol	PLAU	rs
beta-sitosterol	PON1	rs
Gomisin B	POR	rs
Panaxytriol	POR	rs
20(s)-protopanaxadiol	POR	rs
(3R,5R,8R,9R,10R,12R,13R,14R,17S)-17-[(2S)-2-hydroxy-6-methylhept-5-en-2-yl]-4,4,8,10,14-pentamethyl-2,3,5,6,7,9,11,12,13,15,16,17-dodecahydro-1H-cyclopenta[a]phenanthrene-3,12-diol	POR	rs
(3S,5R,8R,9R,10R,12R,13R,14R,17S)-17-[(2S)-2-hydroxy-6-methylhept-5-en-2-yl]-4,4,8,10,14-pentamethyl-2,3,5,6,7,9,11,12,13,15,16,17-dodecahydro-1H-cyclopenta[a]phenanthrene-3,12-diol	POR	rs
(3S,5R,6S,8R,9R,10R,12R,13R,14R,17S)-17-[(2S)-2-hydroxy-6-methylhept-5-en-2-yl]-4,4,8,10,14-pentamethyl-2,3,5,6,7,9,11,12,13,15,16,17-dodecahydro-1H-cyclopenta[a]phenanthrene-3,6,12-triol	POR	rs
(3S,5R,6S,8R,9R,10R,12R,13R,14R,17S)-17-[(2R)-2-hydroxy-6-methylhept-5-en-2-yl]-4,4,8,10,14-pentamethyl-2,3,5,6,7,9,11,12,13,15,16,17-dodecahydro-1H-cyclopenta[a]phenanthrene-3,6,12-triol	POR	rs
alexandrin	POU5F1	rs
(3S,5R,6S,8R,9R,10R,12R,13R,14R,17S)-17-[(2S)-2-hydroxy-6-methylhept-5-en-2-yl]-4,4,8,10,14-pentamethyl-2,3,5,6,7,9,11,12,13,15,16,17-dodecahydro-1H-cyclopenta[a]phenanthrene-3,6,12-triol	POU5F1	rs
kaempferol	PPARG	rs
Campesteryl ferulate	PPARG	rs
darutoside	PPARG	rs
alexandrin	PPARG	rs
(3S,5R,6S,8R,9R,10R,12R,13R,14R,17S)-17-[(2S)-2-hydroxy-6-methylhept-5-en-2-yl]-4,4,8,10,14-pentamethyl-2,3,5,6,7,9,11,12,13,15,16,17-dodecahydro-1H-cyclopenta[a]phenanthrene-3,6,12-triol	PPARG	rs
alexandrin	PRIMA1	rs
(3S,5R,6S,8R,9R,10R,12R,13R,14R,17S)-17-[(2S)-2-hydroxy-6-methylhept-5-en-2-yl]-4,4,8,10,14-pentamethyl-2,3,5,6,7,9,11,12,13,15,16,17-dodecahydro-1H-cyclopenta[a]phenanthrene-3,6,12-triol	PRIMA1	rs
20(s)-protopanaxadiol	PRKAG2	rs
(3R,5R,8R,9R,10R,12R,13R,14R,17S)-17-[(2S)-2-hydroxy-6-methylhept-5-en-2-yl]-4,4,8,10,14-pentamethyl-2,3,5,6,7,9,11,12,13,15,16,17-dodecahydro-1H-cyclopenta[a]phenanthrene-3,12-diol	PRKAG2	rs
(3S,5R,8R,9R,10R,12R,13R,14R,17S)-17-[(2S)-2-hydroxy-6-methylhept-5-en-2-yl]-4,4,8,10,14-pentamethyl-2,3,5,6,7,9,11,12,13,15,16,17-dodecahydro-1H-cyclopenta[a]phenanthrene-3,12-diol	PRKAG2	rs
(3S,5R,6S,8R,9R,10R,12R,13R,14R,17S)-17-[(2S)-2-hydroxy-6-methylhept-5-en-2-yl]-4,4,8,10,14-pentamethyl-2,3,5,6,7,9,11,12,13,15,16,17-dodecahydro-1H-cyclopenta[a]phenanthrene-3,6,12-triol	PRKAG2	rs
(3S,5R,6S,8R,9R,10R,12R,13R,14R,17S)-17-[(2R)-2-hydroxy-6-methylhept-5-en-2-yl]-4,4,8,10,14-pentamethyl-2,3,5,6,7,9,11,12,13,15,16,17-dodecahydro-1H-cyclopenta[a]phenanthrene-3,6,12-triol	PRKAG2	rs
beta-sitosterol	PRKCA	rs
kaempferol	PRSS1	rs
Inermin	PRSS1	rs
Nepetin	PRSS1	rs
beta-sitosterol	PTGS1	rs
kaempferol	PTGS1	rs
Stigmasterol	PTGS1	rs
DBP	PTGS1	rs
Linoleic	PTGS1	rs
Fumarine	PTGS1	rs
9-HEXADECENOIC ACID	PTGS1	rs
METHYL LINOLEATE	PTGS1	rs
Methyl palmitelaidate	PTGS1	rs
Inermin	PTGS1	rs
N-Salicylidene-salicylamine	PTGS1	rs
Dianthramine	PTGS1	rs
arachidonate	PTGS1	rs
Frutinone A	PTGS1	rs
Ginsenoyne B	PTGS1	rs
Girinimbin	PTGS1	rs
Gomisin B	PTGS1	rs
Malvic acid	PTGS1	rs
Panaxytriol	PTGS1	rs
suchilactone	PTGS1	rs
alexandrin	PTGS1	rs
(3S,5R,6S,8R,9R,10R,12R,13R,14R,17S)-17-[(2S)-2-hydroxy-6-methylhept-5-en-2-yl]-4,4,8,10,14-pentamethyl-2,3,5,6,7,9,11,12,13,15,16,17-dodecahydro-1H-cyclopenta[a]phenanthrene-3,6,12-triol	PTGS1	rs
beta-sitosterol	PTGS2	rs
kaempferol	PTGS2	rs
Stigmasterol	PTGS2	rs
DBP	PTGS2	rs
Linoleic	PTGS2	rs
Fumarine	PTGS2	rs
9-HEXADECENOIC ACID	PTGS2	rs
METHYL LINOLEATE	PTGS2	rs
Methyl palmitelaidate	PTGS2	rs
Inermin	PTGS2	rs
N-Salicylidene-salicylamine	PTGS2	rs
Dianthramine	PTGS2	rs
arachidonate	PTGS2	rs
Frutinone A	PTGS2	rs
ginsenoside rh2	PTGS2	rs
Ginsenoyne A	PTGS2	rs
Ginsenoyne B	PTGS2	rs
Ginsenoyne E	PTGS2	rs
Girinimbin	PTGS2	rs
Gomisin B	PTGS2	rs
Malvic acid	PTGS2	rs
Panaxytriol	PTGS2	rs
suchilactone	PTGS2	rs
Nepetin	PTGS2	rs
Dauricine (8CI)	PTGS2	rs
20(s)-protopanaxadiol	PTGS2	rs
(3R,5R,8R,9R,10R,12R,13R,14R,17S)-17-[(2S)-2-hydroxy-6-methylhept-5-en-2-yl]-4,4,8,10,14-pentamethyl-2,3,5,6,7,9,11,12,13,15,16,17-dodecahydro-1H-cyclopenta[a]phenanthrene-3,12-diol	PTGS2	rs
(3S,5R,8R,9R,10R,12R,13R,14R,17S)-17-[(2S)-2-hydroxy-6-methylhept-5-en-2-yl]-4,4,8,10,14-pentamethyl-2,3,5,6,7,9,11,12,13,15,16,17-dodecahydro-1H-cyclopenta[a]phenanthrene-3,12-diol	PTGS2	rs
Folinic acid	PTGS2	rs
Campesteryl ferulate	PTGS2	rs
darutoside	PTGS2	rs
alexandrin	PTGS2	rs
(3S,5R,6S,8R,9R,10R,12R,13R,14R,17S)-17-[(2S)-2-hydroxy-6-methylhept-5-en-2-yl]-4,4,8,10,14-pentamethyl-2,3,5,6,7,9,11,12,13,15,16,17-dodecahydro-1H-cyclopenta[a]phenanthrene-3,6,12-triol	PTGS2	rs
alexandrin	RAC2	rs
(3S,5R,6S,8R,9R,10R,12R,13R,14R,17S)-17-[(2S)-2-hydroxy-6-methylhept-5-en-2-yl]-4,4,8,10,14-pentamethyl-2,3,5,6,7,9,11,12,13,15,16,17-dodecahydro-1H-cyclopenta[a]phenanthrene-3,6,12-triol	RAC2	rs
Folinic acid	RALBP1	rs
20(s)-protopanaxadiol	RB1	rs
(3R,5R,8R,9R,10R,12R,13R,14R,17S)-17-[(2S)-2-hydroxy-6-methylhept-5-en-2-yl]-4,4,8,10,14-pentamethyl-2,3,5,6,7,9,11,12,13,15,16,17-dodecahydro-1H-cyclopenta[a]phenanthrene-3,12-diol	RB1	rs
(3S,5R,8R,9R,10R,12R,13R,14R,17S)-17-[(2S)-2-hydroxy-6-methylhept-5-en-2-yl]-4,4,8,10,14-pentamethyl-2,3,5,6,7,9,11,12,13,15,16,17-dodecahydro-1H-cyclopenta[a]phenanthrene-3,12-diol	RB1	rs
(3S,5R,6S,8R,9R,10R,12R,13R,14R,17S)-17-[(2S)-2-hydroxy-6-methylhept-5-en-2-yl]-4,4,8,10,14-pentamethyl-2,3,5,6,7,9,11,12,13,15,16,17-dodecahydro-1H-cyclopenta[a]phenanthrene-3,6,12-triol	RB1	rs
(3S,5R,6S,8R,9R,10R,12R,13R,14R,17S)-17-[(2R)-2-hydroxy-6-methylhept-5-en-2-yl]-4,4,8,10,14-pentamethyl-2,3,5,6,7,9,11,12,13,15,16,17-dodecahydro-1H-cyclopenta[a]phenanthrene-3,6,12-triol	RB1	rs
kaempferol	RELA	rs
(3S,5R,6S,8R,9R,10R,12R,13R,14R,17S)-17-[(2S)-2-hydroxy-6-methylhept-5-en-2-yl]-4,4,8,10,14-pentamethyl-2,3,5,6,7,9,11,12,13,15,16,17-dodecahydro-1H-cyclopenta[a]phenanthrene-3,6,12-triol	RUNX2	rs
(3S,5R,6S,8R,9R,10R,12R,13R,14R,17S)-17-[(2R)-2-hydroxy-6-methylhept-5-en-2-yl]-4,4,8,10,14-pentamethyl-2,3,5,6,7,9,11,12,13,15,16,17-dodecahydro-1H-cyclopenta[a]phenanthrene-3,6,12-triol	RUNX2	rs
Stigmasterol	RXRA	rs
DBP	RXRA	rs
Linoleic	RXRA	rs
METHYL LINOLEATE	RXRA	rs
Methyl palmitelaidate	RXRA	rs
Inermin	RXRA	rs
Frutinone A	RXRA	rs
Girinimbin	RXRA	rs
suchilactone	RXRA	rs
suchilactone	RXRA	rs
beta-sitosterol	SCN5A	rs
Stigmasterol	SCN5A	rs
Fumarine	SCN5A	rs
Diop	SCN5A	rs
Inermin	SCN5A	rs
Frutinone A	SCN5A	rs
Girinimbin	SCN5A	rs
suchilactone	SCN5A	rs
kaempferol	SELE	rs
Gomisin B	SETD2	rs
Panaxytriol	SETD2	rs
alexandrin	SETD2	rs
(3S,5R,6S,8R,9R,10R,12R,13R,14R,17S)-17-[(2S)-2-hydroxy-6-methylhept-5-en-2-yl]-4,4,8,10,14-pentamethyl-2,3,5,6,7,9,11,12,13,15,16,17-dodecahydro-1H-cyclopenta[a]phenanthrene-3,6,12-triol	SETD2	rs
(3R,5R,8R,9R,10R,12R,13R,14R,17S)-17-[(2S)-2-hydroxy-6-methylhept-5-en-2-yl]-4,4,8,10,14-pentamethyl-2,3,5,6,7,9,11,12,13,15,16,17-dodecahydro-1H-cyclopenta[a]phenanthrene-3,12-diol	SGCB	rs
alexandrin	SI	rs
(3S,5R,6S,8R,9R,10R,12R,13R,14R,17S)-17-[(2S)-2-hydroxy-6-methylhept-5-en-2-yl]-4,4,8,10,14-pentamethyl-2,3,5,6,7,9,11,12,13,15,16,17-dodecahydro-1H-cyclopenta[a]phenanthrene-3,6,12-triol	SI	rs
(3S,5R,6S,8R,9R,10R,12R,13R,14R,17S)-17-[(2R)-2-hydroxy-6-methylhept-5-en-2-yl]-4,4,8,10,14-pentamethyl-2,3,5,6,7,9,11,12,13,15,16,17-dodecahydro-1H-cyclopenta[a]phenanthrene-3,6,12-triol	SI	rs
20(s)-protopanaxadiol	SIRT1	rs
(3R,5R,8R,9R,10R,12R,13R,14R,17S)-17-[(2S)-2-hydroxy-6-methylhept-5-en-2-yl]-4,4,8,10,14-pentamethyl-2,3,5,6,7,9,11,12,13,15,16,17-dodecahydro-1H-cyclopenta[a]phenanthrene-3,12-diol	SIRT1	rs
(3S,5R,8R,9R,10R,12R,13R,14R,17S)-17-[(2S)-2-hydroxy-6-methylhept-5-en-2-yl]-4,4,8,10,14-pentamethyl-2,3,5,6,7,9,11,12,13,15,16,17-dodecahydro-1H-cyclopenta[a]phenanthrene-3,12-diol	SIRT1	rs
alexandrin	SLC10A2	rs
(3S,5R,6S,8R,9R,10R,12R,13R,14R,17S)-17-[(2S)-2-hydroxy-6-methylhept-5-en-2-yl]-4,4,8,10,14-pentamethyl-2,3,5,6,7,9,11,12,13,15,16,17-dodecahydro-1H-cyclopenta[a]phenanthrene-3,6,12-triol	SLC10A2	rs
Gomisin B	SLC1A2	rs
Gomisin B	SLC1A2	rs
Panaxytriol	SLC1A2	rs
alexandrin	SLC22A4	rs
(3S,5R,6S,8R,9R,10R,12R,13R,14R,17S)-17-[(2S)-2-hydroxy-6-methylhept-5-en-2-yl]-4,4,8,10,14-pentamethyl-2,3,5,6,7,9,11,12,13,15,16,17-dodecahydro-1H-cyclopenta[a]phenanthrene-3,6,12-triol	SLC22A4	rs
20(s)-protopanaxadiol	SLC2A1	rs
(3S,5R,8R,9R,10R,12R,13R,14R,17S)-17-[(2S)-2-hydroxy-6-methylhept-5-en-2-yl]-4,4,8,10,14-pentamethyl-2,3,5,6,7,9,11,12,13,15,16,17-dodecahydro-1H-cyclopenta[a]phenanthrene-3,12-diol	SLC2A1	rs
kaempferol	SLC2A4	rs
ginsenoside rh2	SLC2A4	rs
20(s)-protopanaxadiol	SLC3A1	rs
(3R,5R,8R,9R,10R,12R,13R,14R,17S)-17-[(2S)-2-hydroxy-6-methylhept-5-en-2-yl]-4,4,8,10,14-pentamethyl-2,3,5,6,7,9,11,12,13,15,16,17-dodecahydro-1H-cyclopenta[a]phenanthrene-3,12-diol	SLC3A1	rs
(3S,5R,8R,9R,10R,12R,13R,14R,17S)-17-[(2S)-2-hydroxy-6-methylhept-5-en-2-yl]-4,4,8,10,14-pentamethyl-2,3,5,6,7,9,11,12,13,15,16,17-dodecahydro-1H-cyclopenta[a]phenanthrene-3,12-diol	SLC3A1	rs
(3S,5R,6S,8R,9R,10R,12R,13R,14R,17S)-17-[(2R)-2-hydroxy-6-methylhept-5-en-2-yl]-4,4,8,10,14-pentamethyl-2,3,5,6,7,9,11,12,13,15,16,17-dodecahydro-1H-cyclopenta[a]phenanthrene-3,6,12-triol	SLC3A1	rs
20(s)-protopanaxadiol	SLC5A1	rs
(3R,5R,8R,9R,10R,12R,13R,14R,17S)-17-[(2S)-2-hydroxy-6-methylhept-5-en-2-yl]-4,4,8,10,14-pentamethyl-2,3,5,6,7,9,11,12,13,15,16,17-dodecahydro-1H-cyclopenta[a]phenanthrene-3,12-diol	SLC5A1	rs
(3S,5R,8R,9R,10R,12R,13R,14R,17S)-17-[(2S)-2-hydroxy-6-methylhept-5-en-2-yl]-4,4,8,10,14-pentamethyl-2,3,5,6,7,9,11,12,13,15,16,17-dodecahydro-1H-cyclopenta[a]phenanthrene-3,12-diol	SLC5A1	rs
(3S,5R,6S,8R,9R,10R,12R,13R,14R,17S)-17-[(2S)-2-hydroxy-6-methylhept-5-en-2-yl]-4,4,8,10,14-pentamethyl-2,3,5,6,7,9,11,12,13,15,16,17-dodecahydro-1H-cyclopenta[a]phenanthrene-3,6,12-triol	SLC5A1	rs
(3S,5R,6S,8R,9R,10R,12R,13R,14R,17S)-17-[(2R)-2-hydroxy-6-methylhept-5-en-2-yl]-4,4,8,10,14-pentamethyl-2,3,5,6,7,9,11,12,13,15,16,17-dodecahydro-1H-cyclopenta[a]phenanthrene-3,6,12-triol	SLC5A1	rs
kaempferol	SLC6A2	rs
Stigmasterol	SLC6A2	rs
DBP	SLC6A2	rs
Linoleic	SLC6A2	rs
9-HEXADECENOIC ACID	SLC6A2	rs
Aposiopolamine	SLC6A2	rs
Malvic acid	SLC6A2	rs
Stigmasterol	SLC6A3	rs
DBP	SLC6A3	rs
Linoleic	SLC6A3	rs
Fumarine	SLC6A3	rs
Aposiopolamine	SLC6A3	rs
beta-sitosterol	SLC6A4	rs
DBP	SLC6A4	rs
Linoleic	SLC6A4	rs
Fumarine	SLC6A4	rs
Inermin	SLC6A4	rs
Aposiopolamine	SLC6A4	rs
Gomisin B	SLC6A4	rs
Panaxytriol	SLC6A4	rs
Gomisin B	SLCO1B1	rs
Panaxytriol	SLCO1B1	rs
(3R,5R,8R,9R,10R,12R,13R,14R,17S)-17-[(2S)-2-hydroxy-6-methylhept-5-en-2-yl]-4,4,8,10,14-pentamethyl-2,3,5,6,7,9,11,12,13,15,16,17-dodecahydro-1H-cyclopenta[a]phenanthrene-3,12-diol	SLCO1B1	rs
(3S,5R,6S,8R,9R,10R,12R,13R,14R,17S)-17-[(2S)-2-hydroxy-6-methylhept-5-en-2-yl]-4,4,8,10,14-pentamethyl-2,3,5,6,7,9,11,12,13,15,16,17-dodecahydro-1H-cyclopenta[a]phenanthrene-3,6,12-triol	SLCO1B1	rs
(3S,5R,6S,8R,9R,10R,12R,13R,14R,17S)-17-[(2R)-2-hydroxy-6-methylhept-5-en-2-yl]-4,4,8,10,14-pentamethyl-2,3,5,6,7,9,11,12,13,15,16,17-dodecahydro-1H-cyclopenta[a]phenanthrene-3,6,12-triol	SLCO1B1	rs
alexandrin	SNCA	rs
(3S,5R,6S,8R,9R,10R,12R,13R,14R,17S)-17-[(2S)-2-hydroxy-6-methylhept-5-en-2-yl]-4,4,8,10,14-pentamethyl-2,3,5,6,7,9,11,12,13,15,16,17-dodecahydro-1H-cyclopenta[a]phenanthrene-3,6,12-triol	SNCA	rs
(3S,5R,6S,8R,9R,10R,12R,13R,14R,17S)-17-[(2S)-2-hydroxy-6-methylhept-5-en-2-yl]-4,4,8,10,14-pentamethyl-2,3,5,6,7,9,11,12,13,15,16,17-dodecahydro-1H-cyclopenta[a]phenanthrene-3,6,12-triol	SREBF1	rs
kaempferol	STAT1	rs
Gomisin B	STAT3	rs
Panaxytriol	STAT3	rs
20(s)-protopanaxadiol	STAT3	rs
(3R,5R,8R,9R,10R,12R,13R,14R,17S)-17-[(2S)-2-hydroxy-6-methylhept-5-en-2-yl]-4,4,8,10,14-pentamethyl-2,3,5,6,7,9,11,12,13,15,16,17-dodecahydro-1H-cyclopenta[a]phenanthrene-3,12-diol	STAT3	rs
(3S,5R,8R,9R,10R,12R,13R,14R,17S)-17-[(2S)-2-hydroxy-6-methylhept-5-en-2-yl]-4,4,8,10,14-pentamethyl-2,3,5,6,7,9,11,12,13,15,16,17-dodecahydro-1H-cyclopenta[a]phenanthrene-3,12-diol	STAT3	rs
(3S,5R,6S,8R,9R,10R,12R,13R,14R,17S)-17-[(2R)-2-hydroxy-6-methylhept-5-en-2-yl]-4,4,8,10,14-pentamethyl-2,3,5,6,7,9,11,12,13,15,16,17-dodecahydro-1H-cyclopenta[a]phenanthrene-3,6,12-triol	TAC1	rs
(3R,5R,8R,9R,10R,12R,13R,14R,17S)-17-[(2S)-2-hydroxy-6-methylhept-5-en-2-yl]-4,4,8,10,14-pentamethyl-2,3,5,6,7,9,11,12,13,15,16,17-dodecahydro-1H-cyclopenta[a]phenanthrene-3,12-diol	TBK1	rs
(3S,5R,6S,8R,9R,10R,12R,13R,14R,17S)-17-[(2S)-2-hydroxy-6-methylhept-5-en-2-yl]-4,4,8,10,14-pentamethyl-2,3,5,6,7,9,11,12,13,15,16,17-dodecahydro-1H-cyclopenta[a]phenanthrene-3,6,12-triol	TBX21	rs
(3S,5R,6S,8R,9R,10R,12R,13R,14R,17S)-17-[(2R)-2-hydroxy-6-methylhept-5-en-2-yl]-4,4,8,10,14-pentamethyl-2,3,5,6,7,9,11,12,13,15,16,17-dodecahydro-1H-cyclopenta[a]phenanthrene-3,6,12-triol	TBX21	rs
beta-sitosterol	TGFB1	rs
Folinic acid	TGFB2	rs
alexandrin	TH	rs
(3S,5R,6S,8R,9R,10R,12R,13R,14R,17S)-17-[(2S)-2-hydroxy-6-methylhept-5-en-2-yl]-4,4,8,10,14-pentamethyl-2,3,5,6,7,9,11,12,13,15,16,17-dodecahydro-1H-cyclopenta[a]phenanthrene-3,6,12-triol	TH	rs
Gomisin B	TNF	rs
Panaxytriol	TNF	rs
20(s)-protopanaxadiol	TNF	rs
(3R,5R,8R,9R,10R,12R,13R,14R,17S)-17-[(2S)-2-hydroxy-6-methylhept-5-en-2-yl]-4,4,8,10,14-pentamethyl-2,3,5,6,7,9,11,12,13,15,16,17-dodecahydro-1H-cyclopenta[a]phenanthrene-3,12-diol	TNF	rs
(3S,5R,8R,9R,10R,12R,13R,14R,17S)-17-[(2S)-2-hydroxy-6-methylhept-5-en-2-yl]-4,4,8,10,14-pentamethyl-2,3,5,6,7,9,11,12,13,15,16,17-dodecahydro-1H-cyclopenta[a]phenanthrene-3,12-diol	TNF	rs
methyl (Z)-icos-11-enoate	TNF	rs
Folinic acid	TNF	rs
Campesteryl ferulate	TNF	rs
darutoside	TNF	rs
alexandrin	TNF	rs
(3S,5R,6S,8R,9R,10R,12R,13R,14R,17S)-17-[(2S)-2-hydroxy-6-methylhept-5-en-2-yl]-4,4,8,10,14-pentamethyl-2,3,5,6,7,9,11,12,13,15,16,17-dodecahydro-1H-cyclopenta[a]phenanthrene-3,6,12-triol	TNF	rs
(3S,5R,6S,8R,9R,10R,12R,13R,14R,17S)-17-[(2R)-2-hydroxy-6-methylhept-5-en-2-yl]-4,4,8,10,14-pentamethyl-2,3,5,6,7,9,11,12,13,15,16,17-dodecahydro-1H-cyclopenta[a]phenanthrene-3,6,12-triol	TNF	rs
20(s)-protopanaxadiol	TNFRSF1B	rs
(3R,5R,8R,9R,10R,12R,13R,14R,17S)-17-[(2S)-2-hydroxy-6-methylhept-5-en-2-yl]-4,4,8,10,14-pentamethyl-2,3,5,6,7,9,11,12,13,15,16,17-dodecahydro-1H-cyclopenta[a]phenanthrene-3,12-diol	TNFRSF1B	rs
(3S,5R,8R,9R,10R,12R,13R,14R,17S)-17-[(2S)-2-hydroxy-6-methylhept-5-en-2-yl]-4,4,8,10,14-pentamethyl-2,3,5,6,7,9,11,12,13,15,16,17-dodecahydro-1H-cyclopenta[a]phenanthrene-3,12-diol	TNFRSF1B	rs
Folinic acid	TNFRSF1B	rs
alexandrin	TNFRSF1B	rs
(3S,5R,6S,8R,9R,10R,12R,13R,14R,17S)-17-[(2S)-2-hydroxy-6-methylhept-5-en-2-yl]-4,4,8,10,14-pentamethyl-2,3,5,6,7,9,11,12,13,15,16,17-dodecahydro-1H-cyclopenta[a]phenanthrene-3,6,12-triol	TNFRSF1B	rs
Ditertbutyl phthalate	TNFSF11	rs
Gomisin B	TP53	rs
Panaxytriol	TP53	rs
20(s)-protopanaxadiol	TP53	rs
(3R,5R,8R,9R,10R,12R,13R,14R,17S)-17-[(2S)-2-hydroxy-6-methylhept-5-en-2-yl]-4,4,8,10,14-pentamethyl-2,3,5,6,7,9,11,12,13,15,16,17-dodecahydro-1H-cyclopenta[a]phenanthrene-3,12-diol	TP53	rs
(3S,5R,8R,9R,10R,12R,13R,14R,17S)-17-[(2S)-2-hydroxy-6-methylhept-5-en-2-yl]-4,4,8,10,14-pentamethyl-2,3,5,6,7,9,11,12,13,15,16,17-dodecahydro-1H-cyclopenta[a]phenanthrene-3,12-diol	TP53	rs
Folinic acid	TP53	rs
alexandrin	TP53	rs
(3S,5R,6S,8R,9R,10R,12R,13R,14R,17S)-17-[(2S)-2-hydroxy-6-methylhept-5-en-2-yl]-4,4,8,10,14-pentamethyl-2,3,5,6,7,9,11,12,13,15,16,17-dodecahydro-1H-cyclopenta[a]phenanthrene-3,6,12-triol	TP53	rs
Folinic acid	TYMP	rs
Folinic acid	TYMS	rs
Gomisin B	UGT1A1	rs
Panaxytriol	UGT1A1	rs
Folinic acid	UGT1A1	rs
(3S,5R,6S,8R,9R,10R,12R,13R,14R,17S)-17-[(2S)-2-hydroxy-6-methylhept-5-en-2-yl]-4,4,8,10,14-pentamethyl-2,3,5,6,7,9,11,12,13,15,16,17-dodecahydro-1H-cyclopenta[a]phenanthrene-3,6,12-triol	UGT1A1	rs
kaempferol	VCAM1	rs
20(s)-protopanaxadiol	VDR	rs
(3S,5R,8R,9R,10R,12R,13R,14R,17S)-17-[(2S)-2-hydroxy-6-methylhept-5-en-2-yl]-4,4,8,10,14-pentamethyl-2,3,5,6,7,9,11,12,13,15,16,17-dodecahydro-1H-cyclopenta[a]phenanthrene-3,12-diol	VDR	rs
Gomisin B	VEGFA	rs
Panaxytriol	VEGFA	rs
20(s)-protopanaxadiol	VEGFA	rs
(3S,5R,8R,9R,10R,12R,13R,14R,17S)-17-[(2S)-2-hydroxy-6-methylhept-5-en-2-yl]-4,4,8,10,14-pentamethyl-2,3,5,6,7,9,11,12,13,15,16,17-dodecahydro-1H-cyclopenta[a]phenanthrene-3,12-diol	VEGFA	rs
Folinic acid	VEGFA	rs
alexandrin	VEGFA	rs
(3S,5R,6S,8R,9R,10R,12R,13R,14R,17S)-17-[(2S)-2-hydroxy-6-methylhept-5-en-2-yl]-4,4,8,10,14-pentamethyl-2,3,5,6,7,9,11,12,13,15,16,17-dodecahydro-1H-cyclopenta[a]phenanthrene-3,6,12-triol	VEGFA	rs
kaempferol	XDH	rs
alexandrin	XDH	rs
(3S,5R,6S,8R,9R,10R,12R,13R,14R,17S)-17-[(2S)-2-hydroxy-6-methylhept-5-en-2-yl]-4,4,8,10,14-pentamethyl-2,3,5,6,7,9,11,12,13,15,16,17-dodecahydro-1H-cyclopenta[a]phenanthrene-3,6,12-triol	XDH	rs
Folinic acid	XRCC1	rs
Caso4·2H2O	ACHE	sg
Caso4·2H2O	BMP2	sg
Caso4·2H2O	BMP7	sg
Caso4·2H2O	CAT	sg
Caso4·2H2O	FN1	sg
Caso4·2H2O	GNRH1	sg
Caso4·2H2O	HMGB1	sg
Caso4·2H2O	SMAD3	sg
Caso4·2H2O	SPP1	sg
Caso4·2H2O	STAG2	sg
Caso4·2H2O	TAC1	sg
Caso4·2H2O	TBP	sg
Caso4·2H2O	TGFB1	sg
Caso4·2H2O	VEGFA	sg

## Sheet: herbs target genes network
compound	MOL ID	targets	herb
kaempferol	MOL000422	XDH	Panax Ginseng
alexandrin	MOL005398	XDH	Panax Ginseng
(3S,5R,6S,8R,9R,10R,12R,13R,14R,17S)-17-[(2S)-2-hydroxy-6-methylhept-5-en-2-yl]-4,4,8,10,14-pentamethyl-2,3,5,6,7,9,11,12,13,15,16,17-dodecahydro-1H-cyclopenta[a]phenanthrene-3,6,12-triol	MOL005284	XDH	Panax Ginseng
Gomisin B	MOL005357	VEGFA	Panax Ginseng
Panaxytriol	MOL005378	VEGFA	Panax Ginseng
20(s)-protopanaxadiol	MOL005285	VEGFA	Panax Ginseng
(3S,5R,8R,9R,10R,12R,13R,14R,17S)-17-[(2S)-2-hydroxy-6-methylhept-5-en-2-yl]-4,4,8,10,14-pentamethyl-2,3,5,6,7,9,11,12,13,15,16,17-dodecahydro-1H-cyclopenta[a]phenanthrene-3,12-diol	MOL005334	VEGFA	Panax Ginseng
Folinic acid	MOL003845	VEGFA	Panax Ginseng
alexandrin	MOL005398	VEGFA	Panax Ginseng
(3S,5R,6S,8R,9R,10R,12R,13R,14R,17S)-17-[(2S)-2-hydroxy-6-methylhept-5-en-2-yl]-4,4,8,10,14-pentamethyl-2,3,5,6,7,9,11,12,13,15,16,17-dodecahydro-1H-cyclopenta[a]phenanthrene-3,6,12-triol	MOL005284	VEGFA	Panax Ginseng
20(s)-protopanaxadiol	MOL005285	VDR	Panax Ginseng
(3S,5R,8R,9R,10R,12R,13R,14R,17S)-17-[(2S)-2-hydroxy-6-methylhept-5-en-2-yl]-4,4,8,10,14-pentamethyl-2,3,5,6,7,9,11,12,13,15,16,17-dodecahydro-1H-cyclopenta[a]phenanthrene-3,12-diol	MOL005334	VDR	Panax Ginseng
kaempferol	MOL000422	VCAM1	Panax Ginseng
alexandrin	MOL005398	TXNRD1	Panax Ginseng
(3S,5R,6S,8R,9R,10R,12R,13R,14R,17S)-17-[(2S)-2-hydroxy-6-methylhept-5-en-2-yl]-4,4,8,10,14-pentamethyl-2,3,5,6,7,9,11,12,13,15,16,17-dodecahydro-1H-cyclopenta[a]phenanthrene-3,6,12-triol	MOL005284	TXNRD1	Panax Ginseng
Gomisin B	MOL005357	TP53	Panax Ginseng
Panaxytriol	MOL005378	TP53	Panax Ginseng
20(s)-protopanaxadiol	MOL005285	TP53	Panax Ginseng
(3R,5R,8R,9R,10R,12R,13R,14R,17S)-17-[(2S)-2-hydroxy-6-methylhept-5-en-2-yl]-4,4,8,10,14-pentamethyl-2,3,5,6,7,9,11,12,13,15,16,17-dodecahydro-1H-cyclopenta[a]phenanthrene-3,12-diol	MOL005332	TP53	Panax Ginseng
(3S,5R,8R,9R,10R,12R,13R,14R,17S)-17-[(2S)-2-hydroxy-6-methylhept-5-en-2-yl]-4,4,8,10,14-pentamethyl-2,3,5,6,7,9,11,12,13,15,16,17-dodecahydro-1H-cyclopenta[a]phenanthrene-3,12-diol	MOL005334	TP53	Panax Ginseng
Folinic acid	MOL003845	TP53	Panax Ginseng
alexandrin	MOL005398	TP53	Panax Ginseng
(3S,5R,6S,8R,9R,10R,12R,13R,14R,17S)-17-[(2S)-2-hydroxy-6-methylhept-5-en-2-yl]-4,4,8,10,14-pentamethyl-2,3,5,6,7,9,11,12,13,15,16,17-dodecahydro-1H-cyclopenta[a]phenanthrene-3,6,12-triol	MOL005284	TP53	Panax Ginseng
20(s)-protopanaxadiol	MOL005285	TNFRSF1B	Panax Ginseng
(3R,5R,8R,9R,10R,12R,13R,14R,17S)-17-[(2S)-2-hydroxy-6-methylhept-5-en-2-yl]-4,4,8,10,14-pentamethyl-2,3,5,6,7,9,11,12,13,15,16,17-dodecahydro-1H-cyclopenta[a]phenanthrene-3,12-diol	MOL005332	TNFRSF1B	Panax Ginseng
(3S,5R,8R,9R,10R,12R,13R,14R,17S)-17-[(2S)-2-hydroxy-6-methylhept-5-en-2-yl]-4,4,8,10,14-pentamethyl-2,3,5,6,7,9,11,12,13,15,16,17-dodecahydro-1H-cyclopenta[a]phenanthrene-3,12-diol	MOL005334	TNFRSF1B	Panax Ginseng
Folinic acid	MOL003845	TNFRSF1B	Panax Ginseng
alexandrin	MOL005398	TNFRSF1B	Panax Ginseng
(3S,5R,6S,8R,9R,10R,12R,13R,14R,17S)-17-[(2S)-2-hydroxy-6-methylhept-5-en-2-yl]-4,4,8,10,14-pentamethyl-2,3,5,6,7,9,11,12,13,15,16,17-dodecahydro-1H-cyclopenta[a]phenanthrene-3,6,12-triol	MOL005284	TNFRSF1B	Panax Ginseng
Gomisin B	MOL005357	TNF	Panax Ginseng
Panaxytriol	MOL005378	TNF	Panax Ginseng
20(s)-protopanaxadiol	MOL005285	TNF	Panax Ginseng
(3R,5R,8R,9R,10R,12R,13R,14R,17S)-17-[(2S)-2-hydroxy-6-methylhept-5-en-2-yl]-4,4,8,10,14-pentamethyl-2,3,5,6,7,9,11,12,13,15,16,17-dodecahydro-1H-cyclopenta[a]phenanthrene-3,12-diol	MOL005332	TNF	Panax Ginseng
(3S,5R,8R,9R,10R,12R,13R,14R,17S)-17-[(2S)-2-hydroxy-6-methylhept-5-en-2-yl]-4,4,8,10,14-pentamethyl-2,3,5,6,7,9,11,12,13,15,16,17-dodecahydro-1H-cyclopenta[a]phenanthrene-3,12-diol	MOL005334	TNF	Panax Ginseng
methyl (Z)-icos-11-enoate	MOL003902	TNF	Panax Ginseng
Folinic acid	MOL003845	TNF	Panax Ginseng
Campesteryl ferulate	MOL002669	TNF	Panax Ginseng
darutoside	MOL000628	TNF	Panax Ginseng
alexandrin	MOL005398	TNF	Panax Ginseng
(3S,5R,6S,8R,9R,10R,12R,13R,14R,17S)-17-[(2S)-2-hydroxy-6-methylhept-5-en-2-yl]-4,4,8,10,14-pentamethyl-2,3,5,6,7,9,11,12,13,15,16,17-dodecahydro-1H-cyclopenta[a]phenanthrene-3,6,12-triol	MOL005284	TNF	Panax Ginseng
(3S,5R,6S,8R,9R,10R,12R,13R,14R,17S)-17-[(2R)-2-hydroxy-6-methylhept-5-en-2-yl]-4,4,8,10,14-pentamethyl-2,3,5,6,7,9,11,12,13,15,16,17-dodecahydro-1H-cyclopenta[a]phenanthrene-3,6,12-triol	MOL005340	TNF	Panax Ginseng
alexandrin	MOL005398	TH	Panax Ginseng
(3S,5R,6S,8R,9R,10R,12R,13R,14R,17S)-17-[(2S)-2-hydroxy-6-methylhept-5-en-2-yl]-4,4,8,10,14-pentamethyl-2,3,5,6,7,9,11,12,13,15,16,17-dodecahydro-1H-cyclopenta[a]phenanthrene-3,6,12-triol	MOL005284	TH	Panax Ginseng
Folinic acid	MOL003845	TGFB2	Panax Ginseng
beta-sitosterol	MOL000358	TGFB1	Panax Ginseng
(3S,5R,6S,8R,9R,10R,12R,13R,14R,17S)-17-[(2R)-2-hydroxy-6-methylhept-5-en-2-yl]-4,4,8,10,14-pentamethyl-2,3,5,6,7,9,11,12,13,15,16,17-dodecahydro-1H-cyclopenta[a]phenanthrene-3,6,12-triol	MOL005340	TAC1	Panax Ginseng
Gomisin B	MOL005357	STAT3	Panax Ginseng
Panaxytriol	MOL005378	STAT3	Panax Ginseng
20(s)-protopanaxadiol	MOL005285	STAT3	Panax Ginseng
(3R,5R,8R,9R,10R,12R,13R,14R,17S)-17-[(2S)-2-hydroxy-6-methylhept-5-en-2-yl]-4,4,8,10,14-pentamethyl-2,3,5,6,7,9,11,12,13,15,16,17-dodecahydro-1H-cyclopenta[a]phenanthrene-3,12-diol	MOL005332	STAT3	Panax Ginseng
(3S,5R,8R,9R,10R,12R,13R,14R,17S)-17-[(2S)-2-hydroxy-6-methylhept-5-en-2-yl]-4,4,8,10,14-pentamethyl-2,3,5,6,7,9,11,12,13,15,16,17-dodecahydro-1H-cyclopenta[a]phenanthrene-3,12-diol	MOL005334	STAT3	Panax Ginseng
kaempferol	MOL000422	STAT1	Panax Ginseng
Gomisin B	MOL005357	SLCO1B1	Panax Ginseng
Panaxytriol	MOL005378	SLCO1B1	Panax Ginseng
(3R,5R,8R,9R,10R,12R,13R,14R,17S)-17-[(2S)-2-hydroxy-6-methylhept-5-en-2-yl]-4,4,8,10,14-pentamethyl-2,3,5,6,7,9,11,12,13,15,16,17-dodecahydro-1H-cyclopenta[a]phenanthrene-3,12-diol	MOL005332	SLCO1B1	Panax Ginseng
(3S,5R,6S,8R,9R,10R,12R,13R,14R,17S)-17-[(2S)-2-hydroxy-6-methylhept-5-en-2-yl]-4,4,8,10,14-pentamethyl-2,3,5,6,7,9,11,12,13,15,16,17-dodecahydro-1H-cyclopenta[a]phenanthrene-3,6,12-triol	MOL005284	SLCO1B1	Panax Ginseng
(3S,5R,6S,8R,9R,10R,12R,13R,14R,17S)-17-[(2R)-2-hydroxy-6-methylhept-5-en-2-yl]-4,4,8,10,14-pentamethyl-2,3,5,6,7,9,11,12,13,15,16,17-dodecahydro-1H-cyclopenta[a]phenanthrene-3,6,12-triol	MOL005340	SLCO1B1	Panax Ginseng
beta-sitosterol	MOL000358	SLC6A4	Panax Ginseng
DBP	MOL000676	SLC6A4	Panax Ginseng
Linoleic	MOL000749	SLC6A4	Panax Ginseng
Fumarine	MOL000787	SLC6A4	Panax Ginseng
Inermin	MOL003648	SLC6A4	Panax Ginseng
Aposiopolamine	MOL005308	SLC6A4	Panax Ginseng
Gomisin B	MOL005357	SLC6A4	Panax Ginseng
Panaxytriol	MOL005378	SLC6A4	Panax Ginseng
20(s)-protopanaxadiol	MOL005285	SIRT1	Panax Ginseng
(3R,5R,8R,9R,10R,12R,13R,14R,17S)-17-[(2S)-2-hydroxy-6-methylhept-5-en-2-yl]-4,4,8,10,14-pentamethyl-2,3,5,6,7,9,11,12,13,15,16,17-dodecahydro-1H-cyclopenta[a]phenanthrene-3,12-diol	MOL005332	SIRT1	Panax Ginseng
(3S,5R,8R,9R,10R,12R,13R,14R,17S)-17-[(2S)-2-hydroxy-6-methylhept-5-en-2-yl]-4,4,8,10,14-pentamethyl-2,3,5,6,7,9,11,12,13,15,16,17-dodecahydro-1H-cyclopenta[a]phenanthrene-3,12-diol	MOL005334	SIRT1	Panax Ginseng
kaempferol	MOL000422	SELE	Panax Ginseng
beta-sitosterol	MOL000358	SCN5A	Panax Ginseng
Stigmasterol	MOL000449	SCN5A	Panax Ginseng
Fumarine	MOL000787	SCN5A	Panax Ginseng
Diop	MOL002879	SCN5A	Panax Ginseng
Inermin	MOL003648	SCN5A	Panax Ginseng
Frutinone A	MOL005321	SCN5A	Panax Ginseng
Girinimbin	MOL005356	SCN5A	Panax Ginseng
suchilactone	MOL005384	SCN5A	Panax Ginseng
beta-sitosterol	MOL000358	PTGS2	Panax Ginseng
kaempferol	MOL000422	PTGS2	Panax Ginseng
Stigmasterol	MOL000449	PTGS2	Panax Ginseng
DBP	MOL000676	PTGS2	Panax Ginseng
Linoleic	MOL000749	PTGS2	Panax Ginseng
Fumarine	MOL000787	PTGS2	Panax Ginseng
9-HEXADECENOIC ACID	MOL001312	PTGS2	Panax Ginseng
METHYL LINOLEATE	MOL001641	PTGS2	Panax Ginseng
Methyl palmitelaidate	MOL001818	PTGS2	Panax Ginseng
Inermin	MOL003648	PTGS2	Panax Ginseng
N-Salicylidene-salicylamine	MOL004100	PTGS2	Panax Ginseng
Dianthramine	MOL005318	PTGS2	Panax Ginseng
arachidonate	MOL005320	PTGS2	Panax Ginseng
Frutinone A	MOL005321	PTGS2	Panax Ginseng
ginsenoside rh2	MOL005344	PTGS2	Panax Ginseng
Ginsenoyne A	MOL005351	PTGS2	Panax Ginseng
Ginsenoyne B	MOL005352	PTGS2	Panax Ginseng
Ginsenoyne E	MOL005355	PTGS2	Panax Ginseng
Girinimbin	MOL005356	PTGS2	Panax Ginseng
Gomisin B	MOL005357	PTGS2	Panax Ginseng
Malvic acid	MOL005366	PTGS2	Panax Ginseng
Panaxytriol	MOL005378	PTGS2	Panax Ginseng
suchilactone	MOL005384	PTGS2	Panax Ginseng
Nepetin	MOL005305	PTGS2	Panax Ginseng
Dauricine (8CI)	MOL001965	PTGS2	Panax Ginseng
20(s)-protopanaxadiol	MOL005285	PTGS2	Panax Ginseng
(3R,5R,8R,9R,10R,12R,13R,14R,17S)-17-[(2S)-2-hydroxy-6-methylhept-5-en-2-yl]-4,4,8,10,14-pentamethyl-2,3,5,6,7,9,11,12,13,15,16,17-dodecahydro-1H-cyclopenta[a]phenanthrene-3,12-diol	MOL005332	PTGS2	Panax Ginseng
(3S,5R,8R,9R,10R,12R,13R,14R,17S)-17-[(2S)-2-hydroxy-6-methylhept-5-en-2-yl]-4,4,8,10,14-pentamethyl-2,3,5,6,7,9,11,12,13,15,16,17-dodecahydro-1H-cyclopenta[a]phenanthrene-3,12-diol	MOL005334	PTGS2	Panax Ginseng
Folinic acid	MOL003845	PTGS2	Panax Ginseng
Campesteryl ferulate	MOL002669	PTGS2	Panax Ginseng
darutoside	MOL000628	PTGS2	Panax Ginseng
alexandrin	MOL005398	PTGS2	Panax Ginseng
(3S,5R,6S,8R,9R,10R,12R,13R,14R,17S)-17-[(2S)-2-hydroxy-6-methylhept-5-en-2-yl]-4,4,8,10,14-pentamethyl-2,3,5,6,7,9,11,12,13,15,16,17-dodecahydro-1H-cyclopenta[a]phenanthrene-3,6,12-triol	MOL005284	PTGS2	Panax Ginseng
beta-sitosterol	MOL000358	PTGS1	Panax Ginseng
kaempferol	MOL000422	PTGS1	Panax Ginseng
Stigmasterol	MOL000449	PTGS1	Panax Ginseng
DBP	MOL000676	PTGS1	Panax Ginseng
Linoleic	MOL000749	PTGS1	Panax Ginseng
Fumarine	MOL000787	PTGS1	Panax Ginseng
9-HEXADECENOIC ACID	MOL001312	PTGS1	Panax Ginseng
METHYL LINOLEATE	MOL001641	PTGS1	Panax Ginseng
Methyl palmitelaidate	MOL001818	PTGS1	Panax Ginseng
Inermin	MOL003648	PTGS1	Panax Ginseng
N-Salicylidene-salicylamine	MOL004100	PTGS1	Panax Ginseng
Dianthramine	MOL005318	PTGS1	Panax Ginseng
arachidonate	MOL005320	PTGS1	Panax Ginseng
Frutinone A	MOL005321	PTGS1	Panax Ginseng
Ginsenoyne B	MOL005352	PTGS1	Panax Ginseng
Girinimbin	MOL005356	PTGS1	Panax Ginseng
Gomisin B	MOL005357	PTGS1	Panax Ginseng
Malvic acid	MOL005366	PTGS1	Panax Ginseng
Panaxytriol	MOL005378	PTGS1	Panax Ginseng
suchilactone	MOL005384	PTGS1	Panax Ginseng
alexandrin	MOL005398	PTGS1	Panax Ginseng
(3S,5R,6S,8R,9R,10R,12R,13R,14R,17S)-17-[(2S)-2-hydroxy-6-methylhept-5-en-2-yl]-4,4,8,10,14-pentamethyl-2,3,5,6,7,9,11,12,13,15,16,17-dodecahydro-1H-cyclopenta[a]phenanthrene-3,6,12-triol	MOL005284	PTGS1	Panax Ginseng
beta-sitosterol	MOL000358	PRKCA	Panax Ginseng
20(s)-protopanaxadiol	MOL005285	PRKAG2	Panax Ginseng
(3R,5R,8R,9R,10R,12R,13R,14R,17S)-17-[(2S)-2-hydroxy-6-methylhept-5-en-2-yl]-4,4,8,10,14-pentamethyl-2,3,5,6,7,9,11,12,13,15,16,17-dodecahydro-1H-cyclopenta[a]phenanthrene-3,12-diol	MOL005332	PRKAG2	Panax Ginseng
(3S,5R,8R,9R,10R,12R,13R,14R,17S)-17-[(2S)-2-hydroxy-6-methylhept-5-en-2-yl]-4,4,8,10,14-pentamethyl-2,3,5,6,7,9,11,12,13,15,16,17-dodecahydro-1H-cyclopenta[a]phenanthrene-3,12-diol	MOL005334	PRKAG2	Panax Ginseng
(3S,5R,6S,8R,9R,10R,12R,13R,14R,17S)-17-[(2S)-2-hydroxy-6-methylhept-5-en-2-yl]-4,4,8,10,14-pentamethyl-2,3,5,6,7,9,11,12,13,15,16,17-dodecahydro-1H-cyclopenta[a]phenanthrene-3,6,12-triol	MOL005284	PRKAG2	Panax Ginseng
(3S,5R,6S,8R,9R,10R,12R,13R,14R,17S)-17-[(2R)-2-hydroxy-6-methylhept-5-en-2-yl]-4,4,8,10,14-pentamethyl-2,3,5,6,7,9,11,12,13,15,16,17-dodecahydro-1H-cyclopenta[a]phenanthrene-3,6,12-triol	MOL005340	PRKAG2	Panax Ginseng
kaempferol	MOL000422	PPARG	Panax Ginseng
Campesteryl ferulate	MOL002669	PPARG	Panax Ginseng
darutoside	MOL000628	PPARG	Panax Ginseng
alexandrin	MOL005398	PPARG	Panax Ginseng
(3S,5R,6S,8R,9R,10R,12R,13R,14R,17S)-17-[(2S)-2-hydroxy-6-methylhept-5-en-2-yl]-4,4,8,10,14-pentamethyl-2,3,5,6,7,9,11,12,13,15,16,17-dodecahydro-1H-cyclopenta[a]phenanthrene-3,6,12-triol	MOL005284	PPARG	Panax Ginseng
beta-sitosterol	MOL000358	PON1	Panax Ginseng
Stigmasterol	MOL000449	PLAU	Panax Ginseng
alexandrin	MOL005398	PLAT	Panax Ginseng
Gomisin B	MOL005357	PIK3CA	Panax Ginseng
Gomisin B	MOL005357	PIK3CA	Panax Ginseng
Panaxytriol	MOL005378	PIK3CA	Panax Ginseng
20(s)-protopanaxadiol	MOL005285	PIK3CA	Panax Ginseng
(3R,5R,8R,9R,10R,12R,13R,14R,17S)-17-[(2S)-2-hydroxy-6-methylhept-5-en-2-yl]-4,4,8,10,14-pentamethyl-2,3,5,6,7,9,11,12,13,15,16,17-dodecahydro-1H-cyclopenta[a]phenanthrene-3,12-diol	MOL005332	PIK3CA	Panax Ginseng
(3S,5R,8R,9R,10R,12R,13R,14R,17S)-17-[(2S)-2-hydroxy-6-methylhept-5-en-2-yl]-4,4,8,10,14-pentamethyl-2,3,5,6,7,9,11,12,13,15,16,17-dodecahydro-1H-cyclopenta[a]phenanthrene-3,12-diol	MOL005334	PIK3CA	Panax Ginseng
Folinic acid	MOL003845	PIK3CA	Panax Ginseng
alexandrin	MOL005398	PIK3CA	Panax Ginseng
(3S,5R,6S,8R,9R,10R,12R,13R,14R,17S)-17-[(2S)-2-hydroxy-6-methylhept-5-en-2-yl]-4,4,8,10,14-pentamethyl-2,3,5,6,7,9,11,12,13,15,16,17-dodecahydro-1H-cyclopenta[a]phenanthrene-3,6,12-triol	MOL005284	PIK3CA	Panax Ginseng
(3S,5R,6S,8R,9R,10R,12R,13R,14R,17S)-17-[(2R)-2-hydroxy-6-methylhept-5-en-2-yl]-4,4,8,10,14-pentamethyl-2,3,5,6,7,9,11,12,13,15,16,17-dodecahydro-1H-cyclopenta[a]phenanthrene-3,6,12-triol	MOL005340	PIK3CA	Panax Ginseng
Folinic acid	MOL003845	PGF	Panax Ginseng
beta-sitosterol	MOL000358	PDE3A	Panax Ginseng
DBP	MOL000676	PDE3A	Panax Ginseng
Fumarine	MOL000787	PDE3A	Panax Ginseng
Frutinone A	MOL005321	PDE3A	Panax Ginseng
suchilactone	MOL005384	PDE3A	Panax Ginseng
Folinic acid	MOL003845	PDCD1	Panax Ginseng
20(s)-protopanaxadiol	MOL005285	PARP1	Panax Ginseng
(3R,5R,8R,9R,10R,12R,13R,14R,17S)-17-[(2S)-2-hydroxy-6-methylhept-5-en-2-yl]-4,4,8,10,14-pentamethyl-2,3,5,6,7,9,11,12,13,15,16,17-dodecahydro-1H-cyclopenta[a]phenanthrene-3,12-diol	MOL005332	PARP1	Panax Ginseng
(3S,5R,8R,9R,10R,12R,13R,14R,17S)-17-[(2S)-2-hydroxy-6-methylhept-5-en-2-yl]-4,4,8,10,14-pentamethyl-2,3,5,6,7,9,11,12,13,15,16,17-dodecahydro-1H-cyclopenta[a]phenanthrene-3,12-diol	MOL005334	PARP1	Panax Ginseng
alexandrin	MOL005398	PARP1	Panax Ginseng
(3S,5R,6S,8R,9R,10R,12R,13R,14R,17S)-17-[(2S)-2-hydroxy-6-methylhept-5-en-2-yl]-4,4,8,10,14-pentamethyl-2,3,5,6,7,9,11,12,13,15,16,17-dodecahydro-1H-cyclopenta[a]phenanthrene-3,6,12-triol	MOL005284	PARP1	Panax Ginseng
(3S,5R,6S,8R,9R,10R,12R,13R,14R,17S)-17-[(2R)-2-hydroxy-6-methylhept-5-en-2-yl]-4,4,8,10,14-pentamethyl-2,3,5,6,7,9,11,12,13,15,16,17-dodecahydro-1H-cyclopenta[a]phenanthrene-3,6,12-triol	MOL005340	PARP1	Panax Ginseng
Fumarine	MOL000787	OPRD1	Panax Ginseng
Stigmasterol	MOL000449	NR3C2	Panax Ginseng
Deoxyharringtonine	MOL005317	NR3C2	Panax Ginseng
Ginsenoside-Rh4_qt	MOL005348	NR3C2	Panax Ginseng
darutoside	MOL000628	NPPA	Panax Ginseng
(3S,5R,6S,8R,9R,10R,12R,13R,14R,17S)-17-[(2R)-2-hydroxy-6-methylhept-5-en-2-yl]-4,4,8,10,14-pentamethyl-2,3,5,6,7,9,11,12,13,15,16,17-dodecahydro-1H-cyclopenta[a]phenanthrene-3,6,12-triol	MOL005340	NOS3	Panax Ginseng
kaempferol	MOL000422	NOS2	Panax Ginseng
20(s)-protopanaxadiol	MOL005285	NOS2	Panax Ginseng
(3R,5R,8R,9R,10R,12R,13R,14R,17S)-17-[(2S)-2-hydroxy-6-methylhept-5-en-2-yl]-4,4,8,10,14-pentamethyl-2,3,5,6,7,9,11,12,13,15,16,17-dodecahydro-1H-cyclopenta[a]phenanthrene-3,12-diol	MOL005332	NOS2	Panax Ginseng
(3S,5R,8R,9R,10R,12R,13R,14R,17S)-17-[(2S)-2-hydroxy-6-methylhept-5-en-2-yl]-4,4,8,10,14-pentamethyl-2,3,5,6,7,9,11,12,13,15,16,17-dodecahydro-1H-cyclopenta[a]phenanthrene-3,12-diol	MOL005334	NOS2	Panax Ginseng
Campesteryl ferulate	MOL002669	NOS2	Panax Ginseng
ginsenoside rh2	MOL005344	NFKBIA	Panax Ginseng
20(s)-protopanaxadiol	MOL005285	NFKBIA	Panax Ginseng
(3S,5R,8R,9R,10R,12R,13R,14R,17S)-17-[(2S)-2-hydroxy-6-methylhept-5-en-2-yl]-4,4,8,10,14-pentamethyl-2,3,5,6,7,9,11,12,13,15,16,17-dodecahydro-1H-cyclopenta[a]phenanthrene-3,12-diol	MOL005334	NFKBIA	Panax Ginseng
(3S,5R,6S,8R,9R,10R,12R,13R,14R,17S)-17-[(2S)-2-hydroxy-6-methylhept-5-en-2-yl]-4,4,8,10,14-pentamethyl-2,3,5,6,7,9,11,12,13,15,16,17-dodecahydro-1H-cyclopenta[a]phenanthrene-3,6,12-triol	MOL005284	NFKB1	Panax Ginseng
(3S,5R,6S,8R,9R,10R,12R,13R,14R,17S)-17-[(2R)-2-hydroxy-6-methylhept-5-en-2-yl]-4,4,8,10,14-pentamethyl-2,3,5,6,7,9,11,12,13,15,16,17-dodecahydro-1H-cyclopenta[a]phenanthrene-3,6,12-triol	MOL005340	NFKB1	Panax Ginseng
(3R,5R,8R,9R,10R,12R,13R,14R,17S)-17-[(2S)-2-hydroxy-6-methylhept-5-en-2-yl]-4,4,8,10,14-pentamethyl-2,3,5,6,7,9,11,12,13,15,16,17-dodecahydro-1H-cyclopenta[a]phenanthrene-3,12-diol	MOL005332	NFE2L2	Panax Ginseng
Folinic acid	MOL003845	MTR	Panax Ginseng
Gomisin B	MOL005357	MTOR	Panax Ginseng
Panaxytriol	MOL005378	MTOR	Panax Ginseng
20(s)-protopanaxadiol	MOL005285	MTOR	Panax Ginseng
(3R,5R,8R,9R,10R,12R,13R,14R,17S)-17-[(2S)-2-hydroxy-6-methylhept-5-en-2-yl]-4,4,8,10,14-pentamethyl-2,3,5,6,7,9,11,12,13,15,16,17-dodecahydro-1H-cyclopenta[a]phenanthrene-3,12-diol	MOL005332	MTOR	Panax Ginseng
(3S,5R,8R,9R,10R,12R,13R,14R,17S)-17-[(2S)-2-hydroxy-6-methylhept-5-en-2-yl]-4,4,8,10,14-pentamethyl-2,3,5,6,7,9,11,12,13,15,16,17-dodecahydro-1H-cyclopenta[a]phenanthrene-3,12-diol	MOL005334	MTOR	Panax Ginseng
(3S,5R,6S,8R,9R,10R,12R,13R,14R,17S)-17-[(2S)-2-hydroxy-6-methylhept-5-en-2-yl]-4,4,8,10,14-pentamethyl-2,3,5,6,7,9,11,12,13,15,16,17-dodecahydro-1H-cyclopenta[a]phenanthrene-3,6,12-triol	MOL005284	MTOR	Panax Ginseng
(3S,5R,6S,8R,9R,10R,12R,13R,14R,17S)-17-[(2R)-2-hydroxy-6-methylhept-5-en-2-yl]-4,4,8,10,14-pentamethyl-2,3,5,6,7,9,11,12,13,15,16,17-dodecahydro-1H-cyclopenta[a]phenanthrene-3,6,12-triol	MOL005340	MTOR	Panax Ginseng
Folinic acid	MOL003845	MTHFR	Panax Ginseng
(3S,5R,6S,8R,9R,10R,12R,13R,14R,17S)-17-[(2S)-2-hydroxy-6-methylhept-5-en-2-yl]-4,4,8,10,14-pentamethyl-2,3,5,6,7,9,11,12,13,15,16,17-dodecahydro-1H-cyclopenta[a]phenanthrene-3,6,12-triol	MOL005284	MPO	Panax Ginseng
(3S,5R,6S,8R,9R,10R,12R,13R,14R,17S)-17-[(2R)-2-hydroxy-6-methylhept-5-en-2-yl]-4,4,8,10,14-pentamethyl-2,3,5,6,7,9,11,12,13,15,16,17-dodecahydro-1H-cyclopenta[a]phenanthrene-3,6,12-triol	MOL005340	MPO	Panax Ginseng
20(s)-protopanaxadiol	MOL005285	MMP2	Panax Ginseng
(3R,5R,8R,9R,10R,12R,13R,14R,17S)-17-[(2S)-2-hydroxy-6-methylhept-5-en-2-yl]-4,4,8,10,14-pentamethyl-2,3,5,6,7,9,11,12,13,15,16,17-dodecahydro-1H-cyclopenta[a]phenanthrene-3,12-diol	MOL005332	MMP2	Panax Ginseng
(3S,5R,8R,9R,10R,12R,13R,14R,17S)-17-[(2S)-2-hydroxy-6-methylhept-5-en-2-yl]-4,4,8,10,14-pentamethyl-2,3,5,6,7,9,11,12,13,15,16,17-dodecahydro-1H-cyclopenta[a]phenanthrene-3,12-diol	MOL005334	MMP2	Panax Ginseng
(3S,5R,6S,8R,9R,10R,12R,13R,14R,17S)-17-[(2S)-2-hydroxy-6-methylhept-5-en-2-yl]-4,4,8,10,14-pentamethyl-2,3,5,6,7,9,11,12,13,15,16,17-dodecahydro-1H-cyclopenta[a]phenanthrene-3,6,12-triol	MOL005284	MMP2	Panax Ginseng
(3S,5R,6S,8R,9R,10R,12R,13R,14R,17S)-17-[(2R)-2-hydroxy-6-methylhept-5-en-2-yl]-4,4,8,10,14-pentamethyl-2,3,5,6,7,9,11,12,13,15,16,17-dodecahydro-1H-cyclopenta[a]phenanthrene-3,6,12-triol	MOL005340	MMP2	Panax Ginseng
kaempferol	MOL000422	MMP1	Panax Ginseng
alexandrin	MOL005398	MDK	Panax Ginseng
20(s)-protopanaxadiol	MOL005285	MAPK14	Panax Ginseng
(3R,5R,8R,9R,10R,12R,13R,14R,17S)-17-[(2S)-2-hydroxy-6-methylhept-5-en-2-yl]-4,4,8,10,14-pentamethyl-2,3,5,6,7,9,11,12,13,15,16,17-dodecahydro-1H-cyclopenta[a]phenanthrene-3,12-diol	MOL005332	MAPK14	Panax Ginseng
(3S,5R,8R,9R,10R,12R,13R,14R,17S)-17-[(2S)-2-hydroxy-6-methylhept-5-en-2-yl]-4,4,8,10,14-pentamethyl-2,3,5,6,7,9,11,12,13,15,16,17-dodecahydro-1H-cyclopenta[a]phenanthrene-3,12-diol	MOL005334	MAPK14	Panax Ginseng
(3S,5R,6S,8R,9R,10R,12R,13R,14R,17S)-17-[(2S)-2-hydroxy-6-methylhept-5-en-2-yl]-4,4,8,10,14-pentamethyl-2,3,5,6,7,9,11,12,13,15,16,17-dodecahydro-1H-cyclopenta[a]phenanthrene-3,6,12-triol	MOL005284	MAPK14	Panax Ginseng
(3S,5R,6S,8R,9R,10R,12R,13R,14R,17S)-17-[(2R)-2-hydroxy-6-methylhept-5-en-2-yl]-4,4,8,10,14-pentamethyl-2,3,5,6,7,9,11,12,13,15,16,17-dodecahydro-1H-cyclopenta[a]phenanthrene-3,6,12-triol	MOL005340	MAPK14	Panax Ginseng
Chrysanthemaxanthin	MOL004492	MAPK1	Panax Ginseng
20(s)-protopanaxadiol	MOL005285	MAPK1	Panax Ginseng
(3R,5R,8R,9R,10R,12R,13R,14R,17S)-17-[(2S)-2-hydroxy-6-methylhept-5-en-2-yl]-4,4,8,10,14-pentamethyl-2,3,5,6,7,9,11,12,13,15,16,17-dodecahydro-1H-cyclopenta[a]phenanthrene-3,12-diol	MOL005332	MAPK1	Panax Ginseng
(3S,5R,8R,9R,10R,12R,13R,14R,17S)-17-[(2S)-2-hydroxy-6-methylhept-5-en-2-yl]-4,4,8,10,14-pentamethyl-2,3,5,6,7,9,11,12,13,15,16,17-dodecahydro-1H-cyclopenta[a]phenanthrene-3,12-diol	MOL005334	MAPK1	Panax Ginseng
alexandrin	MOL005398	MAPK1	Panax Ginseng
(3S,5R,6S,8R,9R,10R,12R,13R,14R,17S)-17-[(2S)-2-hydroxy-6-methylhept-5-en-2-yl]-4,4,8,10,14-pentamethyl-2,3,5,6,7,9,11,12,13,15,16,17-dodecahydro-1H-cyclopenta[a]phenanthrene-3,6,12-triol	MOL005284	MAPK1	Panax Ginseng
(3S,5R,6S,8R,9R,10R,12R,13R,14R,17S)-17-[(2R)-2-hydroxy-6-methylhept-5-en-2-yl]-4,4,8,10,14-pentamethyl-2,3,5,6,7,9,11,12,13,15,16,17-dodecahydro-1H-cyclopenta[a]phenanthrene-3,6,12-triol	MOL005340	MAPK1	Panax Ginseng
Stigmasterol	MOL000449	LTA4H	Panax Ginseng
Folinic acid	MOL003845	KDR	Panax Ginseng
beta-sitosterol	MOL000358	KCNH2	Panax Ginseng
Fumarine	MOL000787	KCNH2	Panax Ginseng
suchilactone	MOL005384	KCNH2	Panax Ginseng
kaempferol	MOL000422	INSR	Panax Ginseng
20(s)-protopanaxadiol	MOL005285	INS	Panax Ginseng
(3R,5R,8R,9R,10R,12R,13R,14R,17S)-17-[(2S)-2-hydroxy-6-methylhept-5-en-2-yl]-4,4,8,10,14-pentamethyl-2,3,5,6,7,9,11,12,13,15,16,17-dodecahydro-1H-cyclopenta[a]phenanthrene-3,12-diol	MOL005332	INS	Panax Ginseng
(3S,5R,8R,9R,10R,12R,13R,14R,17S)-17-[(2S)-2-hydroxy-6-methylhept-5-en-2-yl]-4,4,8,10,14-pentamethyl-2,3,5,6,7,9,11,12,13,15,16,17-dodecahydro-1H-cyclopenta[a]phenanthrene-3,12-diol	MOL005334	INS	Panax Ginseng
alexandrin	MOL005398	INS	Panax Ginseng
(3S,5R,6S,8R,9R,10R,12R,13R,14R,17S)-17-[(2S)-2-hydroxy-6-methylhept-5-en-2-yl]-4,4,8,10,14-pentamethyl-2,3,5,6,7,9,11,12,13,15,16,17-dodecahydro-1H-cyclopenta[a]phenanthrene-3,6,12-triol	MOL005284	INS	Panax Ginseng
(3S,5R,6S,8R,9R,10R,12R,13R,14R,17S)-17-[(2R)-2-hydroxy-6-methylhept-5-en-2-yl]-4,4,8,10,14-pentamethyl-2,3,5,6,7,9,11,12,13,15,16,17-dodecahydro-1H-cyclopenta[a]phenanthrene-3,6,12-triol	MOL005340	INS	Panax Ginseng
20(s)-protopanaxadiol	MOL005285	IL6	Panax Ginseng
(3R,5R,8R,9R,10R,12R,13R,14R,17S)-17-[(2S)-2-hydroxy-6-methylhept-5-en-2-yl]-4,4,8,10,14-pentamethyl-2,3,5,6,7,9,11,12,13,15,16,17-dodecahydro-1H-cyclopenta[a]phenanthrene-3,12-diol	MOL005332	IL6	Panax Ginseng
(3S,5R,8R,9R,10R,12R,13R,14R,17S)-17-[(2S)-2-hydroxy-6-methylhept-5-en-2-yl]-4,4,8,10,14-pentamethyl-2,3,5,6,7,9,11,12,13,15,16,17-dodecahydro-1H-cyclopenta[a]phenanthrene-3,12-diol	MOL005334	IL6	Panax Ginseng
methyl (Z)-icos-11-enoate	MOL003902	IL6	Panax Ginseng
Folinic acid	MOL003845	IL6	Panax Ginseng
Campesteryl ferulate	MOL002669	IL6	Panax Ginseng
alexandrin	MOL005398	IL6	Panax Ginseng
(3S,5R,6S,8R,9R,10R,12R,13R,14R,17S)-17-[(2S)-2-hydroxy-6-methylhept-5-en-2-yl]-4,4,8,10,14-pentamethyl-2,3,5,6,7,9,11,12,13,15,16,17-dodecahydro-1H-cyclopenta[a]phenanthrene-3,6,12-triol	MOL005284	IL6	Panax Ginseng
(3S,5R,6S,8R,9R,10R,12R,13R,14R,17S)-17-[(2R)-2-hydroxy-6-methylhept-5-en-2-yl]-4,4,8,10,14-pentamethyl-2,3,5,6,7,9,11,12,13,15,16,17-dodecahydro-1H-cyclopenta[a]phenanthrene-3,6,12-triol	MOL005340	IL6	Panax Ginseng
alexandrin	MOL005398	IL4	Panax Ginseng
(3S,5R,6S,8R,9R,10R,12R,13R,14R,17S)-17-[(2S)-2-hydroxy-6-methylhept-5-en-2-yl]-4,4,8,10,14-pentamethyl-2,3,5,6,7,9,11,12,13,15,16,17-dodecahydro-1H-cyclopenta[a]phenanthrene-3,6,12-triol	MOL005284	IL4	Panax Ginseng
(3S,5R,6S,8R,9R,10R,12R,13R,14R,17S)-17-[(2R)-2-hydroxy-6-methylhept-5-en-2-yl]-4,4,8,10,14-pentamethyl-2,3,5,6,7,9,11,12,13,15,16,17-dodecahydro-1H-cyclopenta[a]phenanthrene-3,6,12-triol	MOL005340	IL4	Panax Ginseng
Folinic acid	MOL003845	IL2	Panax Ginseng
alexandrin	MOL005398	IL2	Panax Ginseng
(3S,5R,6S,8R,9R,10R,12R,13R,14R,17S)-17-[(2S)-2-hydroxy-6-methylhept-5-en-2-yl]-4,4,8,10,14-pentamethyl-2,3,5,6,7,9,11,12,13,15,16,17-dodecahydro-1H-cyclopenta[a]phenanthrene-3,6,12-triol	MOL005284	IL2	Panax Ginseng
ginsenoside rh2	MOL005344	IL1B	Panax Ginseng
Chrysanthemaxanthin	MOL004492	IL17A	Panax Ginseng
methyl (Z)-icos-11-enoate	MOL003902	IL10	Panax Ginseng
alexandrin	MOL005398	IL10	Panax Ginseng
(3S,5R,6S,8R,9R,10R,12R,13R,14R,17S)-17-[(2S)-2-hydroxy-6-methylhept-5-en-2-yl]-4,4,8,10,14-pentamethyl-2,3,5,6,7,9,11,12,13,15,16,17-dodecahydro-1H-cyclopenta[a]phenanthrene-3,6,12-triol	MOL005284	IL10	Panax Ginseng
(3S,5R,6S,8R,9R,10R,12R,13R,14R,17S)-17-[(2R)-2-hydroxy-6-methylhept-5-en-2-yl]-4,4,8,10,14-pentamethyl-2,3,5,6,7,9,11,12,13,15,16,17-dodecahydro-1H-cyclopenta[a]phenanthrene-3,6,12-triol	MOL005340	IL10	Panax Ginseng
ginsenoside rh2	MOL005344	IFNG	Panax Ginseng
kaempferol	MOL000422	ICAM1	Panax Ginseng
beta-sitosterol	MOL000358	HTR2A	Panax Ginseng
Stigmasterol	MOL000449	HTR2A	Panax Ginseng
DBP	MOL000676	HTR2A	Panax Ginseng
Fumarine	MOL000787	HTR2A	Panax Ginseng
20(s)-protopanaxadiol	MOL005285	HSPA5	Panax Ginseng
(3S,5R,8R,9R,10R,12R,13R,14R,17S)-17-[(2S)-2-hydroxy-6-methylhept-5-en-2-yl]-4,4,8,10,14-pentamethyl-2,3,5,6,7,9,11,12,13,15,16,17-dodecahydro-1H-cyclopenta[a]phenanthrene-3,12-diol	MOL005334	HSPA5	Panax Ginseng
kaempferol	MOL000422	HMOX1	Panax Ginseng
20(s)-protopanaxadiol	MOL005285	HMOX1	Panax Ginseng
(3S,5R,8R,9R,10R,12R,13R,14R,17S)-17-[(2S)-2-hydroxy-6-methylhept-5-en-2-yl]-4,4,8,10,14-pentamethyl-2,3,5,6,7,9,11,12,13,15,16,17-dodecahydro-1H-cyclopenta[a]phenanthrene-3,12-diol	MOL005334	HMOX1	Panax Ginseng
(3R,5R,8R,9R,10R,12R,13R,14R,17S)-17-[(2S)-2-hydroxy-6-methylhept-5-en-2-yl]-4,4,8,10,14-pentamethyl-2,3,5,6,7,9,11,12,13,15,16,17-dodecahydro-1H-cyclopenta[a]phenanthrene-3,12-diol	MOL005332	HMGCR	Panax Ginseng
(3S,5R,8R,9R,10R,12R,13R,14R,17S)-17-[(2S)-2-hydroxy-6-methylhept-5-en-2-yl]-4,4,8,10,14-pentamethyl-2,3,5,6,7,9,11,12,13,15,16,17-dodecahydro-1H-cyclopenta[a]phenanthrene-3,12-diol	MOL005334	HMGCR	Panax Ginseng
20(s)-protopanaxadiol	MOL005285	HIF1A	Panax Ginseng
(3R,5R,8R,9R,10R,12R,13R,14R,17S)-17-[(2S)-2-hydroxy-6-methylhept-5-en-2-yl]-4,4,8,10,14-pentamethyl-2,3,5,6,7,9,11,12,13,15,16,17-dodecahydro-1H-cyclopenta[a]phenanthrene-3,12-diol	MOL005332	HIF1A	Panax Ginseng
(3S,5R,8R,9R,10R,12R,13R,14R,17S)-17-[(2S)-2-hydroxy-6-methylhept-5-en-2-yl]-4,4,8,10,14-pentamethyl-2,3,5,6,7,9,11,12,13,15,16,17-dodecahydro-1H-cyclopenta[a]phenanthrene-3,12-diol	MOL005334	HIF1A	Panax Ginseng
kaempferol	MOL000422	GSTM1	Panax Ginseng
DBP	MOL000676	GSK3B	Panax Ginseng
Gomisin B	MOL005357	GPT	Panax Ginseng
Panaxytriol	MOL005378	GPT	Panax Ginseng
Folinic acid	MOL003845	GPT	Panax Ginseng
alexandrin	MOL005398	GPT	Panax Ginseng
(3S,5R,6S,8R,9R,10R,12R,13R,14R,17S)-17-[(2S)-2-hydroxy-6-methylhept-5-en-2-yl]-4,4,8,10,14-pentamethyl-2,3,5,6,7,9,11,12,13,15,16,17-dodecahydro-1H-cyclopenta[a]phenanthrene-3,6,12-triol	MOL005284	GPT	Panax Ginseng
(3S,5R,6S,8R,9R,10R,12R,13R,14R,17S)-17-[(2S)-2-hydroxy-6-methylhept-5-en-2-yl]-4,4,8,10,14-pentamethyl-2,3,5,6,7,9,11,12,13,15,16,17-dodecahydro-1H-cyclopenta[a]phenanthrene-3,6,12-triol	MOL005284	FABP4	Panax Ginseng
alexandrin	MOL005398	F9	Panax Ginseng
(3S,5R,6S,8R,9R,10R,12R,13R,14R,17S)-17-[(2S)-2-hydroxy-6-methylhept-5-en-2-yl]-4,4,8,10,14-pentamethyl-2,3,5,6,7,9,11,12,13,15,16,17-dodecahydro-1H-cyclopenta[a]phenanthrene-3,6,12-triol	MOL005284	F9	Panax Ginseng
kaempferol	MOL000422	F7	Panax Ginseng
Fumarine	MOL000787	F7	Panax Ginseng
suchilactone	MOL005384	F7	Panax Ginseng
Nepetin	MOL005305	F7	Panax Ginseng
Gomisin B	MOL005357	ESR1	Panax Ginseng
Panaxytriol	MOL005378	ESR1	Panax Ginseng
20(s)-protopanaxadiol	MOL005285	ESR1	Panax Ginseng
(3R,5R,8R,9R,10R,12R,13R,14R,17S)-17-[(2S)-2-hydroxy-6-methylhept-5-en-2-yl]-4,4,8,10,14-pentamethyl-2,3,5,6,7,9,11,12,13,15,16,17-dodecahydro-1H-cyclopenta[a]phenanthrene-3,12-diol	MOL005332	ESR1	Panax Ginseng
(3S,5R,8R,9R,10R,12R,13R,14R,17S)-17-[(2S)-2-hydroxy-6-methylhept-5-en-2-yl]-4,4,8,10,14-pentamethyl-2,3,5,6,7,9,11,12,13,15,16,17-dodecahydro-1H-cyclopenta[a]phenanthrene-3,12-diol	MOL005334	ESR1	Panax Ginseng
(3S,5R,6S,8R,9R,10R,12R,13R,14R,17S)-17-[(2S)-2-hydroxy-6-methylhept-5-en-2-yl]-4,4,8,10,14-pentamethyl-2,3,5,6,7,9,11,12,13,15,16,17-dodecahydro-1H-cyclopenta[a]phenanthrene-3,6,12-triol	MOL005284	ESR1	Panax Ginseng
(3S,5R,6S,8R,9R,10R,12R,13R,14R,17S)-17-[(2R)-2-hydroxy-6-methylhept-5-en-2-yl]-4,4,8,10,14-pentamethyl-2,3,5,6,7,9,11,12,13,15,16,17-dodecahydro-1H-cyclopenta[a]phenanthrene-3,6,12-triol	MOL005340	ESR1	Panax Ginseng
Folinic acid	MOL003845	EGF	Panax Ginseng
alexandrin	MOL005398	EGF	Panax Ginseng
(3S,5R,6S,8R,9R,10R,12R,13R,14R,17S)-17-[(2S)-2-hydroxy-6-methylhept-5-en-2-yl]-4,4,8,10,14-pentamethyl-2,3,5,6,7,9,11,12,13,15,16,17-dodecahydro-1H-cyclopenta[a]phenanthrene-3,6,12-triol	MOL005284	EGF	Panax Ginseng
Nepetin	MOL005305	DPP4	Panax Ginseng
kaempferol	MOL000422	CYP3A4	Panax Ginseng
Gomisin B	MOL005357	CYP3A4	Panax Ginseng
Gomisin B	MOL005357	CYP3A4	Panax Ginseng
Panaxytriol	MOL005378	CYP3A4	Panax Ginseng
20(s)-protopanaxadiol	MOL005285	CYP3A4	Panax Ginseng
(3R,5R,8R,9R,10R,12R,13R,14R,17S)-17-[(2S)-2-hydroxy-6-methylhept-5-en-2-yl]-4,4,8,10,14-pentamethyl-2,3,5,6,7,9,11,12,13,15,16,17-dodecahydro-1H-cyclopenta[a]phenanthrene-3,12-diol	MOL005332	CYP3A4	Panax Ginseng
(3S,5R,8R,9R,10R,12R,13R,14R,17S)-17-[(2S)-2-hydroxy-6-methylhept-5-en-2-yl]-4,4,8,10,14-pentamethyl-2,3,5,6,7,9,11,12,13,15,16,17-dodecahydro-1H-cyclopenta[a]phenanthrene-3,12-diol	MOL005334	CYP3A4	Panax Ginseng
(3S,5R,6S,8R,9R,10R,12R,13R,14R,17S)-17-[(2S)-2-hydroxy-6-methylhept-5-en-2-yl]-4,4,8,10,14-pentamethyl-2,3,5,6,7,9,11,12,13,15,16,17-dodecahydro-1H-cyclopenta[a]phenanthrene-3,6,12-triol	MOL005284	CYP3A4	Panax Ginseng
(3S,5R,6S,8R,9R,10R,12R,13R,14R,17S)-17-[(2R)-2-hydroxy-6-methylhept-5-en-2-yl]-4,4,8,10,14-pentamethyl-2,3,5,6,7,9,11,12,13,15,16,17-dodecahydro-1H-cyclopenta[a]phenanthrene-3,6,12-triol	MOL005340	CYP3A4	Panax Ginseng
Gomisin B	MOL005357	CYP2D6	Panax Ginseng
Panaxytriol	MOL005378	CYP2D6	Panax Ginseng
(3S,5R,6S,8R,9R,10R,12R,13R,14R,17S)-17-[(2S)-2-hydroxy-6-methylhept-5-en-2-yl]-4,4,8,10,14-pentamethyl-2,3,5,6,7,9,11,12,13,15,16,17-dodecahydro-1H-cyclopenta[a]phenanthrene-3,6,12-triol	MOL005284	CYP2D6	Panax Ginseng
Gomisin B	MOL005357	CYP2C9	Panax Ginseng
Panaxytriol	MOL005378	CYP2C9	Panax Ginseng
Gomisin B	MOL005357	CYP2C19	Panax Ginseng
Panaxytriol	MOL005378	CYP2C19	Panax Ginseng
Gomisin B	MOL005357	CYP1A2	Panax Ginseng
Panaxytriol	MOL005378	CYP1A2	Panax Ginseng
darutoside	MOL000628	CXCL8	Panax Ginseng
20(s)-protopanaxadiol	MOL005285	CTNNB1	Panax Ginseng
(3S,5R,8R,9R,10R,12R,13R,14R,17S)-17-[(2S)-2-hydroxy-6-methylhept-5-en-2-yl]-4,4,8,10,14-pentamethyl-2,3,5,6,7,9,11,12,13,15,16,17-dodecahydro-1H-cyclopenta[a]phenanthrene-3,12-diol	MOL005334	CTNNB1	Panax Ginseng
Folinic acid	MOL003845	CSF3	Panax Ginseng
Folinic acid	MOL003845	CSF2	Panax Ginseng
Folinic acid	MOL003845	CRP	Panax Ginseng
Folinic acid	MOL003845	CDKN2A	Panax Ginseng
kaempferol	MOL000422	CD40LG	Panax Ginseng
ginsenoside rh2	MOL005344	CD40LG	Panax Ginseng
Folinic acid	MOL003845	CD40LG	Panax Ginseng
alexandrin	MOL005398	CD40LG	Panax Ginseng
(3S,5R,6S,8R,9R,10R,12R,13R,14R,17S)-17-[(2S)-2-hydroxy-6-methylhept-5-en-2-yl]-4,4,8,10,14-pentamethyl-2,3,5,6,7,9,11,12,13,15,16,17-dodecahydro-1H-cyclopenta[a]phenanthrene-3,6,12-triol	MOL005284	CD40LG	Panax Ginseng
(3S,5R,6S,8R,9R,10R,12R,13R,14R,17S)-17-[(2R)-2-hydroxy-6-methylhept-5-en-2-yl]-4,4,8,10,14-pentamethyl-2,3,5,6,7,9,11,12,13,15,16,17-dodecahydro-1H-cyclopenta[a]phenanthrene-3,6,12-triol	MOL005340	CD40LG	Panax Ginseng
20(s)-protopanaxadiol	MOL005285	CCND1	Panax Ginseng
(3R,5R,8R,9R,10R,12R,13R,14R,17S)-17-[(2S)-2-hydroxy-6-methylhept-5-en-2-yl]-4,4,8,10,14-pentamethyl-2,3,5,6,7,9,11,12,13,15,16,17-dodecahydro-1H-cyclopenta[a]phenanthrene-3,12-diol	MOL005332	CCND1	Panax Ginseng
(3S,5R,8R,9R,10R,12R,13R,14R,17S)-17-[(2S)-2-hydroxy-6-methylhept-5-en-2-yl]-4,4,8,10,14-pentamethyl-2,3,5,6,7,9,11,12,13,15,16,17-dodecahydro-1H-cyclopenta[a]phenanthrene-3,12-diol	MOL005334	CCND1	Panax Ginseng
20(s)-protopanaxadiol	MOL005285	CAT	Panax Ginseng
(3R,5R,8R,9R,10R,12R,13R,14R,17S)-17-[(2S)-2-hydroxy-6-methylhept-5-en-2-yl]-4,4,8,10,14-pentamethyl-2,3,5,6,7,9,11,12,13,15,16,17-dodecahydro-1H-cyclopenta[a]phenanthrene-3,12-diol	MOL005332	CAT	Panax Ginseng
(3S,5R,8R,9R,10R,12R,13R,14R,17S)-17-[(2S)-2-hydroxy-6-methylhept-5-en-2-yl]-4,4,8,10,14-pentamethyl-2,3,5,6,7,9,11,12,13,15,16,17-dodecahydro-1H-cyclopenta[a]phenanthrene-3,12-diol	MOL005334	CAT	Panax Ginseng
alexandrin	MOL005398	CAT	Panax Ginseng
(3S,5R,6S,8R,9R,10R,12R,13R,14R,17S)-17-[(2S)-2-hydroxy-6-methylhept-5-en-2-yl]-4,4,8,10,14-pentamethyl-2,3,5,6,7,9,11,12,13,15,16,17-dodecahydro-1H-cyclopenta[a]phenanthrene-3,6,12-triol	MOL005284	CAT	Panax Ginseng
(3S,5R,6S,8R,9R,10R,12R,13R,14R,17S)-17-[(2R)-2-hydroxy-6-methylhept-5-en-2-yl]-4,4,8,10,14-pentamethyl-2,3,5,6,7,9,11,12,13,15,16,17-dodecahydro-1H-cyclopenta[a]phenanthrene-3,6,12-triol	MOL005340	CAT	Panax Ginseng
beta-sitosterol	MOL000358	CASP3	Panax Ginseng
kaempferol	MOL000422	CASP3	Panax Ginseng
Chrysanthemaxanthin	MOL004492	CASP3	Panax Ginseng
ginsenoside rh2	MOL005344	CASP3	Panax Ginseng
20(s)-protopanaxadiol	MOL005285	CASP3	Panax Ginseng
(3R,5R,8R,9R,10R,12R,13R,14R,17S)-17-[(2S)-2-hydroxy-6-methylhept-5-en-2-yl]-4,4,8,10,14-pentamethyl-2,3,5,6,7,9,11,12,13,15,16,17-dodecahydro-1H-cyclopenta[a]phenanthrene-3,12-diol	MOL005332	CASP3	Panax Ginseng
(3S,5R,8R,9R,10R,12R,13R,14R,17S)-17-[(2S)-2-hydroxy-6-methylhept-5-en-2-yl]-4,4,8,10,14-pentamethyl-2,3,5,6,7,9,11,12,13,15,16,17-dodecahydro-1H-cyclopenta[a]phenanthrene-3,12-diol	MOL005334	CASP3	Panax Ginseng
alexandrin	MOL005398	CASP3	Panax Ginseng
(3S,5R,6S,8R,9R,10R,12R,13R,14R,17S)-17-[(2S)-2-hydroxy-6-methylhept-5-en-2-yl]-4,4,8,10,14-pentamethyl-2,3,5,6,7,9,11,12,13,15,16,17-dodecahydro-1H-cyclopenta[a]phenanthrene-3,6,12-triol	MOL005284	CASP3	Panax Ginseng
(3S,5R,6S,8R,9R,10R,12R,13R,14R,17S)-17-[(2R)-2-hydroxy-6-methylhept-5-en-2-yl]-4,4,8,10,14-pentamethyl-2,3,5,6,7,9,11,12,13,15,16,17-dodecahydro-1H-cyclopenta[a]phenanthrene-3,6,12-triol	MOL005340	CASP3	Panax Ginseng
Folinic acid	MOL003845	BRAF	Panax Ginseng
(3S,5R,6S,8R,9R,10R,12R,13R,14R,17S)-17-[(2S)-2-hydroxy-6-methylhept-5-en-2-yl]-4,4,8,10,14-pentamethyl-2,3,5,6,7,9,11,12,13,15,16,17-dodecahydro-1H-cyclopenta[a]phenanthrene-3,6,12-triol	MOL005284	BMP2	Panax Ginseng
(3S,5R,6S,8R,9R,10R,12R,13R,14R,17S)-17-[(2R)-2-hydroxy-6-methylhept-5-en-2-yl]-4,4,8,10,14-pentamethyl-2,3,5,6,7,9,11,12,13,15,16,17-dodecahydro-1H-cyclopenta[a]phenanthrene-3,6,12-triol	MOL005340	BMP2	Panax Ginseng
alexandrin	MOL005398	BCL2L1	Panax Ginseng
(3S,5R,6S,8R,9R,10R,12R,13R,14R,17S)-17-[(2S)-2-hydroxy-6-methylhept-5-en-2-yl]-4,4,8,10,14-pentamethyl-2,3,5,6,7,9,11,12,13,15,16,17-dodecahydro-1H-cyclopenta[a]phenanthrene-3,6,12-triol	MOL005284	BCL2L1	Panax Ginseng
beta-sitosterol	MOL000358	BCL2	Panax Ginseng
kaempferol	MOL000422	BCL2	Panax Ginseng
20(s)-protopanaxadiol	MOL005285	BCL2	Panax Ginseng
(3R,5R,8R,9R,10R,12R,13R,14R,17S)-17-[(2S)-2-hydroxy-6-methylhept-5-en-2-yl]-4,4,8,10,14-pentamethyl-2,3,5,6,7,9,11,12,13,15,16,17-dodecahydro-1H-cyclopenta[a]phenanthrene-3,12-diol	MOL005332	BCL2	Panax Ginseng
(3S,5R,8R,9R,10R,12R,13R,14R,17S)-17-[(2S)-2-hydroxy-6-methylhept-5-en-2-yl]-4,4,8,10,14-pentamethyl-2,3,5,6,7,9,11,12,13,15,16,17-dodecahydro-1H-cyclopenta[a]phenanthrene-3,12-diol	MOL005334	BCL2	Panax Ginseng
Folinic acid	MOL003845	BCL2	Panax Ginseng
alexandrin	MOL005398	BCL2	Panax Ginseng
(3S,5R,6S,8R,9R,10R,12R,13R,14R,17S)-17-[(2S)-2-hydroxy-6-methylhept-5-en-2-yl]-4,4,8,10,14-pentamethyl-2,3,5,6,7,9,11,12,13,15,16,17-dodecahydro-1H-cyclopenta[a]phenanthrene-3,6,12-triol	MOL005284	BCL2	Panax Ginseng
(3S,5R,6S,8R,9R,10R,12R,13R,14R,17S)-17-[(2R)-2-hydroxy-6-methylhept-5-en-2-yl]-4,4,8,10,14-pentamethyl-2,3,5,6,7,9,11,12,13,15,16,17-dodecahydro-1H-cyclopenta[a]phenanthrene-3,6,12-triol	MOL005340	BCL2	Panax Ginseng
alexandrin	MOL005398	BCHE	Panax Ginseng
(3S,5R,6S,8R,9R,10R,12R,13R,14R,17S)-17-[(2S)-2-hydroxy-6-methylhept-5-en-2-yl]-4,4,8,10,14-pentamethyl-2,3,5,6,7,9,11,12,13,15,16,17-dodecahydro-1H-cyclopenta[a]phenanthrene-3,6,12-triol	MOL005284	BCHE	Panax Ginseng
beta-sitosterol	MOL000358	BAX	Panax Ginseng
kaempferol	MOL000422	BAX	Panax Ginseng
ginsenoside rh2	MOL005344	BAX	Panax Ginseng
(3R,5R,8R,9R,10R,12R,13R,14R,17S)-17-[(2S)-2-hydroxy-6-methylhept-5-en-2-yl]-4,4,8,10,14-pentamethyl-2,3,5,6,7,9,11,12,13,15,16,17-dodecahydro-1H-cyclopenta[a]phenanthrene-3,12-diol	MOL005332	ATG7	Panax Ginseng
kaempferol	MOL000422	AR	Panax Ginseng
Deoxyharringtonine	MOL005317	AR	Panax Ginseng
Frutinone A	MOL005321	AR	Panax Ginseng
20(s)-protopanaxadiol	MOL005285	AR	Panax Ginseng
(3R,5R,8R,9R,10R,12R,13R,14R,17S)-17-[(2S)-2-hydroxy-6-methylhept-5-en-2-yl]-4,4,8,10,14-pentamethyl-2,3,5,6,7,9,11,12,13,15,16,17-dodecahydro-1H-cyclopenta[a]phenanthrene-3,12-diol	MOL005332	AR	Panax Ginseng
(3S,5R,8R,9R,10R,12R,13R,14R,17S)-17-[(2S)-2-hydroxy-6-methylhept-5-en-2-yl]-4,4,8,10,14-pentamethyl-2,3,5,6,7,9,11,12,13,15,16,17-dodecahydro-1H-cyclopenta[a]phenanthrene-3,12-diol	MOL005334	AR	Panax Ginseng
(3S,5R,6S,8R,9R,10R,12R,13R,14R,17S)-17-[(2S)-2-hydroxy-6-methylhept-5-en-2-yl]-4,4,8,10,14-pentamethyl-2,3,5,6,7,9,11,12,13,15,16,17-dodecahydro-1H-cyclopenta[a]phenanthrene-3,6,12-triol	MOL005284	APOE	Panax Ginseng
20(s)-protopanaxadiol	MOL005285	ANXA5	Panax Ginseng
(3R,5R,8R,9R,10R,12R,13R,14R,17S)-17-[(2S)-2-hydroxy-6-methylhept-5-en-2-yl]-4,4,8,10,14-pentamethyl-2,3,5,6,7,9,11,12,13,15,16,17-dodecahydro-1H-cyclopenta[a]phenanthrene-3,12-diol	MOL005332	ANXA5	Panax Ginseng
(3S,5R,8R,9R,10R,12R,13R,14R,17S)-17-[(2S)-2-hydroxy-6-methylhept-5-en-2-yl]-4,4,8,10,14-pentamethyl-2,3,5,6,7,9,11,12,13,15,16,17-dodecahydro-1H-cyclopenta[a]phenanthrene-3,12-diol	MOL005334	ANXA5	Panax Ginseng
alexandrin	MOL005398	ANXA5	Panax Ginseng
(3S,5R,6S,8R,9R,10R,12R,13R,14R,17S)-17-[(2S)-2-hydroxy-6-methylhept-5-en-2-yl]-4,4,8,10,14-pentamethyl-2,3,5,6,7,9,11,12,13,15,16,17-dodecahydro-1H-cyclopenta[a]phenanthrene-3,6,12-triol	MOL005284	ANXA5	Panax Ginseng
(3S,5R,6S,8R,9R,10R,12R,13R,14R,17S)-17-[(2R)-2-hydroxy-6-methylhept-5-en-2-yl]-4,4,8,10,14-pentamethyl-2,3,5,6,7,9,11,12,13,15,16,17-dodecahydro-1H-cyclopenta[a]phenanthrene-3,6,12-triol	MOL005340	ANXA5	Panax Ginseng
kaempferol	MOL000422	ALOX5	Panax Ginseng
Folinic acid	MOL003845	ALB	Panax Ginseng
kaempferol	MOL000422	AKT1	Panax Ginseng
Gomisin B	MOL005357	AKT1	Panax Ginseng
Panaxytriol	MOL005378	AKT1	Panax Ginseng
20(s)-protopanaxadiol	MOL005285	AKT1	Panax Ginseng
(3R,5R,8R,9R,10R,12R,13R,14R,17S)-17-[(2S)-2-hydroxy-6-methylhept-5-en-2-yl]-4,4,8,10,14-pentamethyl-2,3,5,6,7,9,11,12,13,15,16,17-dodecahydro-1H-cyclopenta[a]phenanthrene-3,12-diol	MOL005332	AKT1	Panax Ginseng
(3S,5R,8R,9R,10R,12R,13R,14R,17S)-17-[(2S)-2-hydroxy-6-methylhept-5-en-2-yl]-4,4,8,10,14-pentamethyl-2,3,5,6,7,9,11,12,13,15,16,17-dodecahydro-1H-cyclopenta[a]phenanthrene-3,12-diol	MOL005334	AKT1	Panax Ginseng
alexandrin	MOL005398	AKT1	Panax Ginseng
(3S,5R,6S,8R,9R,10R,12R,13R,14R,17S)-17-[(2S)-2-hydroxy-6-methylhept-5-en-2-yl]-4,4,8,10,14-pentamethyl-2,3,5,6,7,9,11,12,13,15,16,17-dodecahydro-1H-cyclopenta[a]phenanthrene-3,6,12-triol	MOL005284	AKT1	Panax Ginseng
(3S,5R,6S,8R,9R,10R,12R,13R,14R,17S)-17-[(2R)-2-hydroxy-6-methylhept-5-en-2-yl]-4,4,8,10,14-pentamethyl-2,3,5,6,7,9,11,12,13,15,16,17-dodecahydro-1H-cyclopenta[a]phenanthrene-3,6,12-triol	MOL005340	AKT1	Panax Ginseng
beta-sitosterol	MOL000358	ADRB2	Panax Ginseng
Stigmasterol	MOL000449	ADRB2	Panax Ginseng
DBP	MOL000676	ADRB2	Panax Ginseng
Linoleic	MOL000749	ADRB2	Panax Ginseng
Fumarine	MOL000787	ADRB2	Panax Ginseng
Diop	MOL002879	ADRB2	Panax Ginseng
Inermin	MOL003648	ADRB2	Panax Ginseng
Aposiopolamine	MOL005308	ADRB2	Panax Ginseng
Frutinone A	MOL005321	ADRB2	Panax Ginseng
Girinimbin	MOL005356	ADRB2	Panax Ginseng
suchilactone	MOL005384	ADRB2	Panax Ginseng
Stigmasterol	MOL000449	ADRB1	Panax Ginseng
Linoleic	MOL000749	ADRB1	Panax Ginseng
Linoleic	MOL000749	ADRA2B	Panax Ginseng
Campesteryl ferulate	MOL002669	ADIPOQ	Panax Ginseng
alexandrin	MOL005398	ABCG8	Panax Ginseng
(3S,5R,6S,8R,9R,10R,12R,13R,14R,17S)-17-[(2S)-2-hydroxy-6-methylhept-5-en-2-yl]-4,4,8,10,14-pentamethyl-2,3,5,6,7,9,11,12,13,15,16,17-dodecahydro-1H-cyclopenta[a]phenanthrene-3,6,12-triol	MOL005284	ABCG8	Panax Ginseng
alexandrin	MOL005398	ABCG5	Panax Ginseng
(3S,5R,6S,8R,9R,10R,12R,13R,14R,17S)-17-[(2S)-2-hydroxy-6-methylhept-5-en-2-yl]-4,4,8,10,14-pentamethyl-2,3,5,6,7,9,11,12,13,15,16,17-dodecahydro-1H-cyclopenta[a]phenanthrene-3,6,12-triol	MOL005284	ABCG5	Panax Ginseng
Gomisin B	MOL005357	ABCB1	Panax Ginseng
Panaxytriol	MOL005378	ABCB1	Panax Ginseng
20(s)-protopanaxadiol	MOL005285	ABCB1	Panax Ginseng
(3R,5R,8R,9R,10R,12R,13R,14R,17S)-17-[(2S)-2-hydroxy-6-methylhept-5-en-2-yl]-4,4,8,10,14-pentamethyl-2,3,5,6,7,9,11,12,13,15,16,17-dodecahydro-1H-cyclopenta[a]phenanthrene-3,12-diol	MOL005332	ABCB1	Panax Ginseng
(3S,5R,8R,9R,10R,12R,13R,14R,17S)-17-[(2S)-2-hydroxy-6-methylhept-5-en-2-yl]-4,4,8,10,14-pentamethyl-2,3,5,6,7,9,11,12,13,15,16,17-dodecahydro-1H-cyclopenta[a]phenanthrene-3,12-diol	MOL005334	ABCB1	Panax Ginseng
Folinic acid	MOL003845	ABCB1	Panax Ginseng
Caso4·2H2O	Caso4·2H2O	VEGFA	Gypsum
Caso4·2H2O	Caso4·2H2O	TGFB1	Gypsum
Caso4·2H2O	Caso4·2H2O	TAC1	Gypsum
Caso4·2H2O	Caso4·2H2O	SPP1	Gypsum
Caso4·2H2O	Caso4·2H2O	SPARC	Gypsum
Caso4·2H2O	Caso4·2H2O	SMAD3	Gypsum
Caso4·2H2O	Caso4·2H2O	HMGB1	Gypsum
Caso4·2H2O	Caso4·2H2O	FN1	Gypsum
Caso4·2H2O	Caso4·2H2O	CAT	Gypsum
Caso4·2H2O	Caso4·2H2O	CA3	Gypsum
Caso4·2H2O	Caso4·2H2O	BMP2	Gypsum
tetrandrine	MOL002343	CCND1	Fourstamen Stephania Root
Berbamine	MOL002352	XDH	Fourstamen Stephania Root
Berbamine	MOL002352	VEGFA	Fourstamen Stephania Root
Berbamine	MOL002352	VAMP8	Fourstamen Stephania Root
tetrandrine	MOL002343	TP53	Fourstamen Stephania Root
Berbamine	MOL002352	TP53	Fourstamen Stephania Root
Berbamine	MOL002352	TNF	Fourstamen Stephania Root
aristolene	MOL002348	TNF	Fourstamen Stephania Root
tetrandrine	MOL002343	TGFB1	Fourstamen Stephania Root
beta-sitosterol	MOL000358	TGFB1	Fourstamen Stephania Root
Berbamine	MOL002352	STAT4	Fourstamen Stephania Root
Berbamine	MOL002352	STAT3	Fourstamen Stephania Root
TNP00326	MOL002330	SP1	Fourstamen Stephania Root
tetrandrine	MOL002343	SMAD3	Fourstamen Stephania Root
STOCK1N-53032	MOL002332	SLC6A4	Fourstamen Stephania Root
N-Methylflindersine	MOL002331	SLC6A4	Fourstamen Stephania Root
beta-sitosterol	MOL000358	SLC6A4	Fourstamen Stephania Root
STOCK1N-53032	MOL002332	SCN5A	Fourstamen Stephania Root
N-Methylflindersine	MOL002331	SCN5A	Fourstamen Stephania Root
menisperine	MOL000794	SCN5A	Fourstamen Stephania Root
magnoflorine	MOL000764	SCN5A	Fourstamen Stephania Root
Hesperetin	MOL002341	SCN5A	Fourstamen Stephania Root
beta-sitosterol	MOL000358	SCN5A	Fourstamen Stephania Root
Aristololactum	MOL002345	SCN5A	Fourstamen Stephania Root
STOCK1N-53032	MOL002332	PTGS2	Fourstamen Stephania Root
N-Methylflindersine	MOL002331	PTGS2	Fourstamen Stephania Root
menisperine	MOL000794	PTGS2	Fourstamen Stephania Root
magnoflorine	MOL000764	PTGS2	Fourstamen Stephania Root
Hesperetin	MOL002341	PTGS2	Fourstamen Stephania Root
beta-sitosterol	MOL000358	PTGS2	Fourstamen Stephania Root
Betaine	MOL002346	PTGS2	Fourstamen Stephania Root
Aristololactum	MOL002345	PTGS2	Fourstamen Stephania Root
49070_FLUKA	MOL001390	PTGS2	Fourstamen Stephania Root
TNP00326	MOL002330	PTGS2	Fourstamen Stephania Root
Berbamine	MOL002352	PTGS2	Fourstamen Stephania Root
STOCK1N-53032	MOL002332	PTGS1	Fourstamen Stephania Root
N-Methylflindersine	MOL002331	PTGS1	Fourstamen Stephania Root
menisperine	MOL000794	PTGS1	Fourstamen Stephania Root
magnoflorine	MOL000764	PTGS1	Fourstamen Stephania Root
Hesperetin	MOL002341	PTGS1	Fourstamen Stephania Root
beta-sitosterol	MOL000358	PTGS1	Fourstamen Stephania Root
Betaine	MOL002346	PTGS1	Fourstamen Stephania Root
Aristololactum	MOL002345	PTGS1	Fourstamen Stephania Root
Tetraneurin A	MOL002333	PRTN3	Fourstamen Stephania Root
beta-sitosterol	MOL000358	PRKCA	Fourstamen Stephania Root
beta-sitosterol	MOL000358	PON1	Fourstamen Stephania Root
Berbamine	MOL002352	PIK3CA	Fourstamen Stephania Root
N-Methylflindersine	MOL002331	PDE3A	Fourstamen Stephania Root
beta-sitosterol	MOL000358	PDE3A	Fourstamen Stephania Root
Berbamine	MOL002352	PARP1	Fourstamen Stephania Root
STOCK1N-53032	MOL002332	OPRD1	Fourstamen Stephania Root
menisperine	MOL000794	OPRD1	Fourstamen Stephania Root
magnoflorine	MOL000764	OPRD1	Fourstamen Stephania Root
TNP00326	MOL002330	NOS3	Fourstamen Stephania Root
N-Methylflindersine	MOL002331	NOS2	Fourstamen Stephania Root
Berbamine	MOL002352	NFKBIA	Fourstamen Stephania Root
Berbamine	MOL002352	NFKB1	Fourstamen Stephania Root
Berbamine	MOL002352	MTOR	Fourstamen Stephania Root
TNP00326	MOL002330	MPO	Fourstamen Stephania Root
Berbamine	MOL002352	MAP1LC3A	Fourstamen Stephania Root
Berbamine	MOL002352	LDLR	Fourstamen Stephania Root
TNP00326	MOL002330	KNG1	Fourstamen Stephania Root
menisperine	MOL000794	KCNH2	Fourstamen Stephania Root
magnoflorine	MOL000764	KCNH2	Fourstamen Stephania Root
beta-sitosterol	MOL000358	KCNH2	Fourstamen Stephania Root
Berbamine	MOL002352	JAK2	Fourstamen Stephania Root
TNP00326	MOL002330	INS	Fourstamen Stephania Root
Berbamine	MOL002352	INS	Fourstamen Stephania Root
TNP00326	MOL002330	IL6	Fourstamen Stephania Root
Berbamine	MOL002352	IL6	Fourstamen Stephania Root
aristolene	MOL002348	IL6	Fourstamen Stephania Root
tetrandrine	MOL002343	IL4	Fourstamen Stephania Root
tetrandrine	MOL002343	IL2	Fourstamen Stephania Root
tetrandrine	MOL002343	IFNG	Fourstamen Stephania Root
STOCK1N-53032	MOL002332	HTR2A	Fourstamen Stephania Root
beta-sitosterol	MOL000358	HTR2A	Fourstamen Stephania Root
TNP00326	MOL002330	HMOX1	Fourstamen Stephania Root
Berbamine	MOL002352	HMOX1	Fourstamen Stephania Root
Berbamine	MOL002352	G6PD	Fourstamen Stephania Root
TNP00326	MOL002330	F2R	Fourstamen Stephania Root
TNP00326	MOL002330	F2	Fourstamen Stephania Root
Berbamine	MOL002352	F2	Fourstamen Stephania Root
Berbamine	MOL002352	CYP27A1	Fourstamen Stephania Root
Berbamine	MOL002352	CTNNB1	Fourstamen Stephania Root
Berbamine	MOL002352	CSF3	Fourstamen Stephania Root
Berbamine	MOL002352	CCND1	Fourstamen Stephania Root
beta-sitosterol	MOL000358	CASP3	Fourstamen Stephania Root
Berbamine	MOL002352	CASP3	Fourstamen Stephania Root
Berbamine	MOL002352	CAMK2G	Fourstamen Stephania Root
Berbamine	MOL002352	BNIP3	Fourstamen Stephania Root
TNP00326	MOL002330	BIRC5	Fourstamen Stephania Root
Berbamine	MOL002352	BIRC5	Fourstamen Stephania Root
Berbamine	MOL002352	BECN1	Fourstamen Stephania Root
TNP00326	MOL002330	BDKRB2	Fourstamen Stephania Root
Berbamine	MOL002352	BCL2L1	Fourstamen Stephania Root
beta-sitosterol	MOL000358	BCL2	Fourstamen Stephania Root
TNP00326	MOL002330	BCL2	Fourstamen Stephania Root
Berbamine	MOL002352	BCL2	Fourstamen Stephania Root
Berbamine	MOL002352	BCHE	Fourstamen Stephania Root
beta-sitosterol	MOL000358	BAX	Fourstamen Stephania Root
TNP00326	MOL002330	B2M	Fourstamen Stephania Root
TNP00326	MOL002330	AVP	Fourstamen Stephania Root
menisperine	MOL000794	AR	Fourstamen Stephania Root
magnoflorine	MOL000764	AR	Fourstamen Stephania Root
TNP00326	MOL002330	AQP4	Fourstamen Stephania Root
Berbamine	MOL002352	ANXA5	Fourstamen Stephania Root
aristolene	MOL002348	ANXA5	Fourstamen Stephania Root
Berbamine	MOL002352	AKT1	Fourstamen Stephania Root
STOCK1N-53032	MOL002332	ADRB2	Fourstamen Stephania Root
N-Methylflindersine	MOL002331	ADRB2	Fourstamen Stephania Root
menisperine	MOL000794	ADRB2	Fourstamen Stephania Root
beta-sitosterol	MOL000358	ADRB2	Fourstamen Stephania Root
Berbamine	MOL002352	ACE2	Fourstamen Stephania Root
TNP00326	MOL002330	ABCB1	Fourstamen Stephania Root
Berbamine	MOL002352	ABCB1	Fourstamen Stephania Root
Peroxyergosterol	MOL011169	VEGFA	Cassia Twig
Peroxyergosterol	MOL011169	TNF	Cassia Twig
Peroxyergosterol	MOL011169	TLR4	Cassia Twig
beta-sitosterol	MOL000358	TGFB1	Cassia Twig
Peroxyergosterol	MOL011169	STAT3	Cassia Twig
Peroxyergosterol	MOL011169	STAT1	Cassia Twig
oleic acid	MOL000675	SOD1	Cassia Twig
Peroxyergosterol	MOL011169	SMAD3	Cassia Twig
Peroxyergosterol	MOL011169	SMAD2	Cassia Twig
WLN: RVO2R	MOL010556	SLC6A4	Cassia Twig
DIBP	MOL000057	SLC6A4	Cassia Twig
beta-sitosterol	MOL000358	SLC6A4	Cassia Twig
1,2-Dibenzoylethane	MOL010555	SLC6A4	Cassia Twig
1,2-Benzenedicarboxylicacid, mono(2-ethyl) hexylester	MOL005472	SLC6A4	Cassia Twig
oleic acid	MOL000675	SERPINE1	Cassia Twig
Sitogluside	MOL000357	SCN5A	Cassia Twig
DMEP	MOL010551	SCN5A	Cassia Twig
beta-sitosterol	MOL000358	SCN5A	Cassia Twig
1,2-Benzenedicarboxylicacid, mono(2-ethyl) hexylester	MOL005472	SCN5A	Cassia Twig
Peroxyergosterol	MOL011169	PTPN11	Cassia Twig
α-Longipinene	MOL000025	PTGS2	Cassia Twig
taxifolin	MOL004576	PTGS2	Cassia Twig
ST069309	MOL010546	PTGS2	Cassia Twig
Sitogluside	MOL000357	PTGS2	Cassia Twig
phytol	MOL001442	PTGS2	Cassia Twig
oleic acid	MOL000675	PTGS2	Cassia Twig
ent-Epicatechin	MOL000073	PTGS2	Cassia Twig
ELD	MOL001746	PTGS2	Cassia Twig
EIC	MOL000131	PTGS2	Cassia Twig
DBP	MOL000676	PTGS2	Cassia Twig
copaene	MOL001600	PTGS2	Cassia Twig
copaene	MOL001600	PTGS2	Cassia Twig
beta-sitosterol	MOL000358	PTGS2	Cassia Twig
beta-Cubebene	MOL000266	PTGS2	Cassia Twig
1,2-Dibenzoylethane	MOL010555	PTGS2	Cassia Twig
1,2-Benzenedicarboxylicacid, mono(2-ethyl) hexylester	MOL005472	PTGS2	Cassia Twig
(+)-catechin	MOL000492	PTGS2	Cassia Twig
(-)-taxifolin	MOL001736	PTGS2	Cassia Twig
(-)-Epoxycaryophyllene	MOL000474	PTGS2	Cassia Twig
(-)-Caryophyllene oxide	MOL002003	PTGS2	Cassia Twig
()-alpha-Funebrene	MOL010380	PTGS2	Cassia Twig
(-)-alpha-cedrene	MOL000612	PTGS2	Cassia Twig
Peroxyergosterol	MOL011169	PTGS2	Cassia Twig
taxifolin	MOL004576	PTGS1	Cassia Twig
Sitogluside	MOL000357	PTGS1	Cassia Twig
oleic acid	MOL000675	PTGS1	Cassia Twig
ent-Epicatechin	MOL000073	PTGS1	Cassia Twig
ELD	MOL001746	PTGS1	Cassia Twig
EIC	MOL000131	PTGS1	Cassia Twig
DBP	MOL000676	PTGS1	Cassia Twig
copaene	MOL001600	PTGS1	Cassia Twig
beta-sitosterol	MOL000358	PTGS1	Cassia Twig
1,2-Dibenzoylethane	MOL010555	PTGS1	Cassia Twig
(+)-catechin	MOL000492	PTGS1	Cassia Twig
(-)-taxifolin	MOL001736	PTGS1	Cassia Twig
beta-sitosterol	MOL000358	PRKCA	Cassia Twig
oleic acid	MOL000675	PPARG	Cassia Twig
phytol	MOL001442	PPARA	Cassia Twig
oleic acid	MOL000675	PPARA	Cassia Twig
oleic acid	MOL000675	PON1	Cassia Twig
beta-sitosterol	MOL000358	PON1	Cassia Twig
oleic acid	MOL000675	PLAU	Cassia Twig
Peroxyergosterol	MOL011169	PIK3CA	Cassia Twig
Sitogluside	MOL000357	PDE3A	Cassia Twig
DBP	MOL000676	PDE3A	Cassia Twig
beta-sitosterol	MOL000358	PDE3A	Cassia Twig
1,2-Dibenzoylethane	MOL010555	PDE3A	Cassia Twig
1,2-Benzenedicarboxylicacid, mono(2-ethyl) hexylester	MOL005472	PDE3A	Cassia Twig
Peroxyergosterol	MOL011169	PARP1	Cassia Twig
ST069309	MOL010546	OPRD1	Cassia Twig
sitosterol	MOL000359	NR3C2	Cassia Twig
DIBP	MOL000057	NR3C2	Cassia Twig
ST069309	MOL010546	NOS2	Cassia Twig
Peroxyergosterol	MOL011169	NOS2	Cassia Twig
Peroxyergosterol	MOL011169	NFKB1	Cassia Twig
oleic acid	MOL000675	MPO	Cassia Twig
Peroxyergosterol	MOL011169	MAPK14	Cassia Twig
1,2-Dibenzoylethane	MOL010555	LTA4H	Cassia Twig
Peroxyergosterol	MOL011169	LDLR	Cassia Twig
1, 10, 14-trimethyl-2-pentadecanone	MOL010544	KNG1	Cassia Twig
Sitogluside	MOL000357	KCNH2	Cassia Twig
beta-sitosterol	MOL000358	KCNH2	Cassia Twig
1, 10, 14-trimethyl-2-pentadecanone	MOL010544	INS	Cassia Twig
Peroxyergosterol	MOL011169	IL6	Cassia Twig
Peroxyergosterol	MOL011169	IL2	Cassia Twig
taxifolin	MOL004576	ICAM1	Cassia Twig
DIBP	MOL000057	HTR2A	Cassia Twig
DBP	MOL000676	HTR2A	Cassia Twig
beta-sitosterol	MOL000358	HTR2A	Cassia Twig
(&#8722;)-Alloaromadendrene	MOL001179	HTR2A	Cassia Twig
DBP	MOL000676	GSK3B	Cassia Twig
1, 10, 14-trimethyl-2-pentadecanone	MOL010544	GAA	Cassia Twig
Peroxyergosterol	MOL011169	GAA	Cassia Twig
ST069309	MOL010546	ESR1	Cassia Twig
ent-Epicatechin	MOL000073	ESR1	Cassia Twig
1,2-Dibenzoylethane	MOL010555	ESR1	Cassia Twig
(+)-catechin	MOL000492	ESR1	Cassia Twig
Peroxyergosterol	MOL011169	CXCL8	Cassia Twig
Peroxyergosterol	MOL011169	CTNNB1	Cassia Twig
oleic acid	MOL000675	CRP	Cassia Twig
1, 10, 14-trimethyl-2-pentadecanone	MOL010544	CCND1	Cassia Twig
Peroxyergosterol	MOL011169	CCND1	Cassia Twig
1, 10, 14-trimethyl-2-pentadecanone	MOL010544	CAT	Cassia Twig
beta-sitosterol	MOL000358	CASP3	Cassia Twig
1, 10, 14-trimethyl-2-pentadecanone	MOL010544	CASP3	Cassia Twig
Peroxyergosterol	MOL011169	CASP3	Cassia Twig
Peroxyergosterol	MOL011169	BCL2L1	Cassia Twig
beta-sitosterol	MOL000358	BCL2	Cassia Twig
Peroxyergosterol	MOL011169	BCL2	Cassia Twig
beta-sitosterol	MOL000358	BAX	Cassia Twig
ST069309	MOL010546	AR	Cassia Twig
1, 10, 14-trimethyl-2-pentadecanone	MOL010544	ALB	Cassia Twig
Peroxyergosterol	MOL011169	AKT1	Cassia Twig
WLN: RVO2R	MOL010556	ADRB2	Cassia Twig
ST069309	MOL010546	ADRB2	Cassia Twig
Sitogluside	MOL000357	ADRB2	Cassia Twig
DMEP	MOL010551	ADRB2	Cassia Twig
DIBP	MOL000057	ADRB2	Cassia Twig
DBP	MOL000676	ADRB2	Cassia Twig
beta-sitosterol	MOL000358	ADRB2	Cassia Twig
1,2-Dibenzoylethane	MOL010555	ADRB2	Cassia Twig
1,2-Benzenedicarboxylicacid, mono(2-ethyl) hexylester	MOL005472	ADRB2	Cassia Twig
(&#8722;)-Alloaromadendrene	MOL001179	ADRB2	Cassia Twig
WLN: RVO2R	MOL010556	ADRB1	Cassia Twig
1,2-Dibenzoylethane	MOL010555	ADRB1	Cassia Twig
1,2-Benzenedicarboxylicacid, mono(2-ethyl) hexylester	MOL005472	ADRB1	Cassia Twig
(&#8722;)-Alloaromadendrene	MOL001179	ADRB1	Cassia Twig
WLN: RVO2R	MOL010556	ADRA2B	Cassia Twig
